# Supplementary material for: Practical implementation of DNA methylation and copy-number-based CNS tumor diagnostics: the Heidelberg experience
Source: Springer Nature journal article supplement (doi:10.1007/s00401-018-1879-y), 2018-07-02

# m. c. anaplastic pilocytic astrocytoma (n=21)

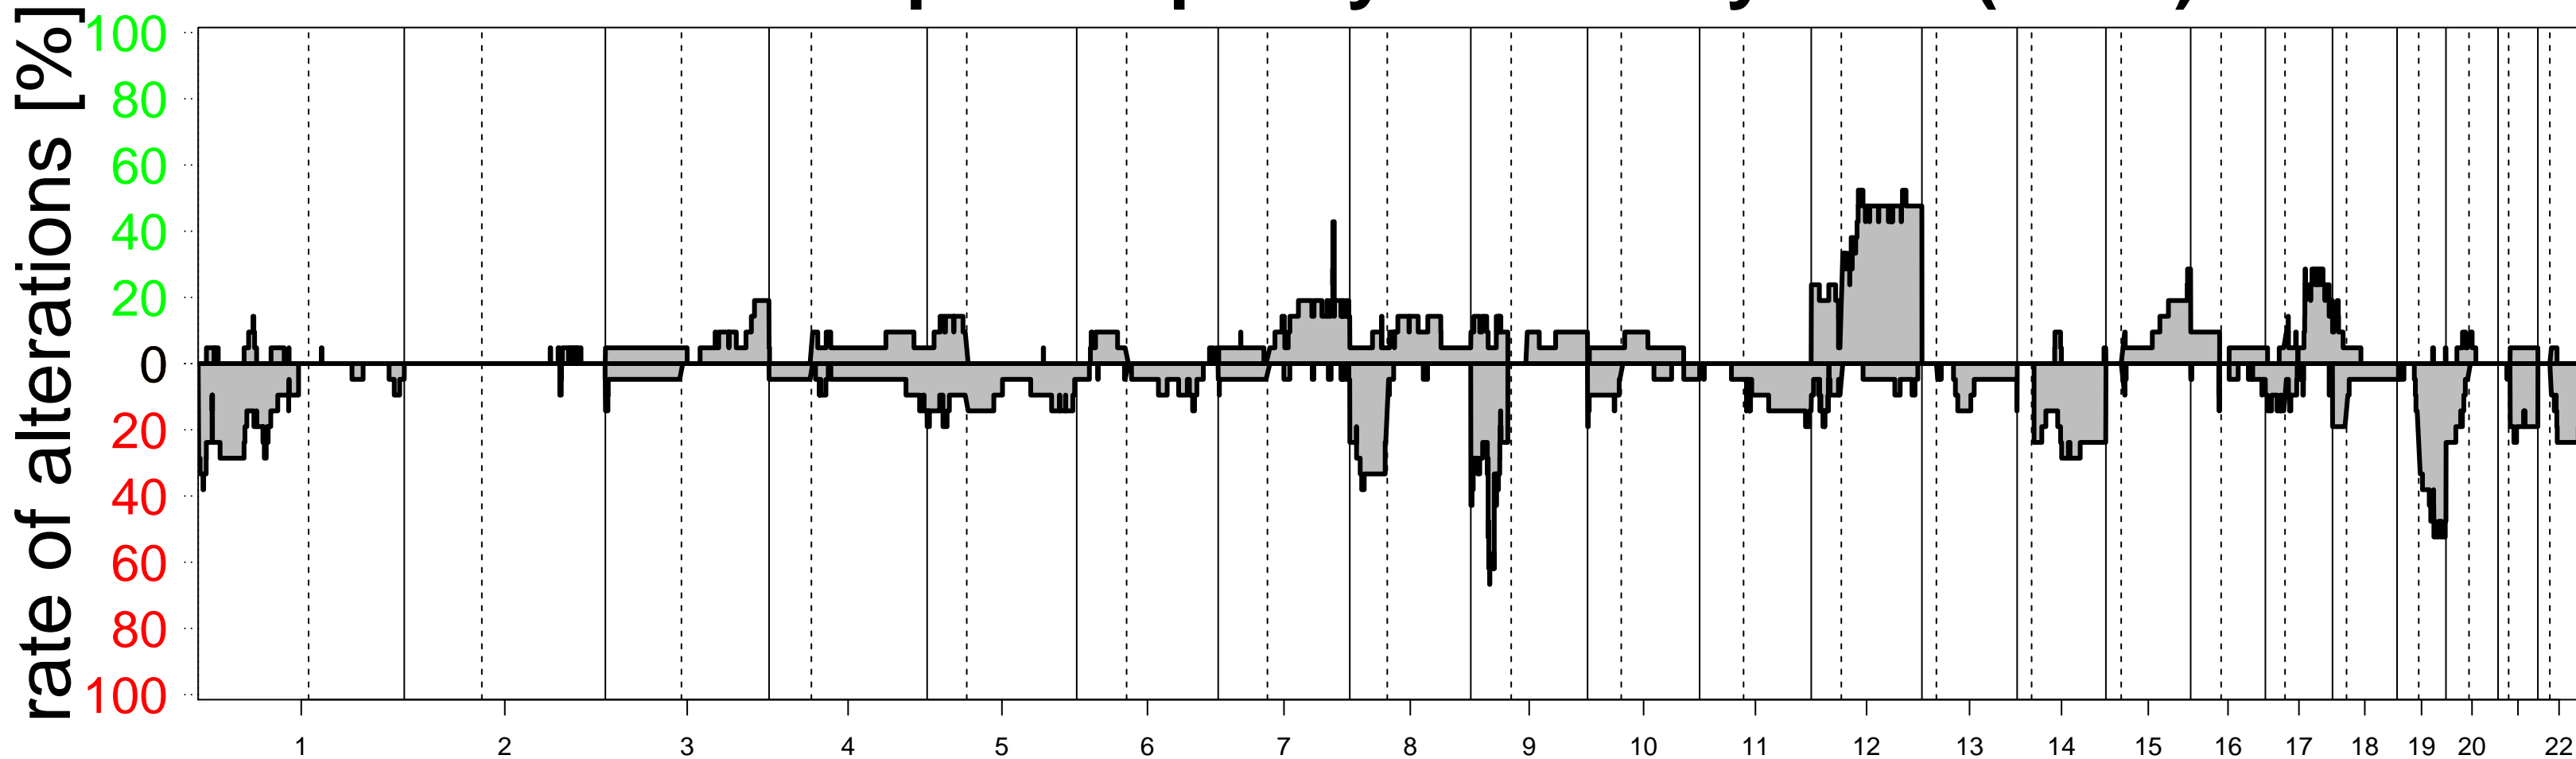

# m. c. (anaplastic) pleomorphic xanthoastrocytoma (n=44)

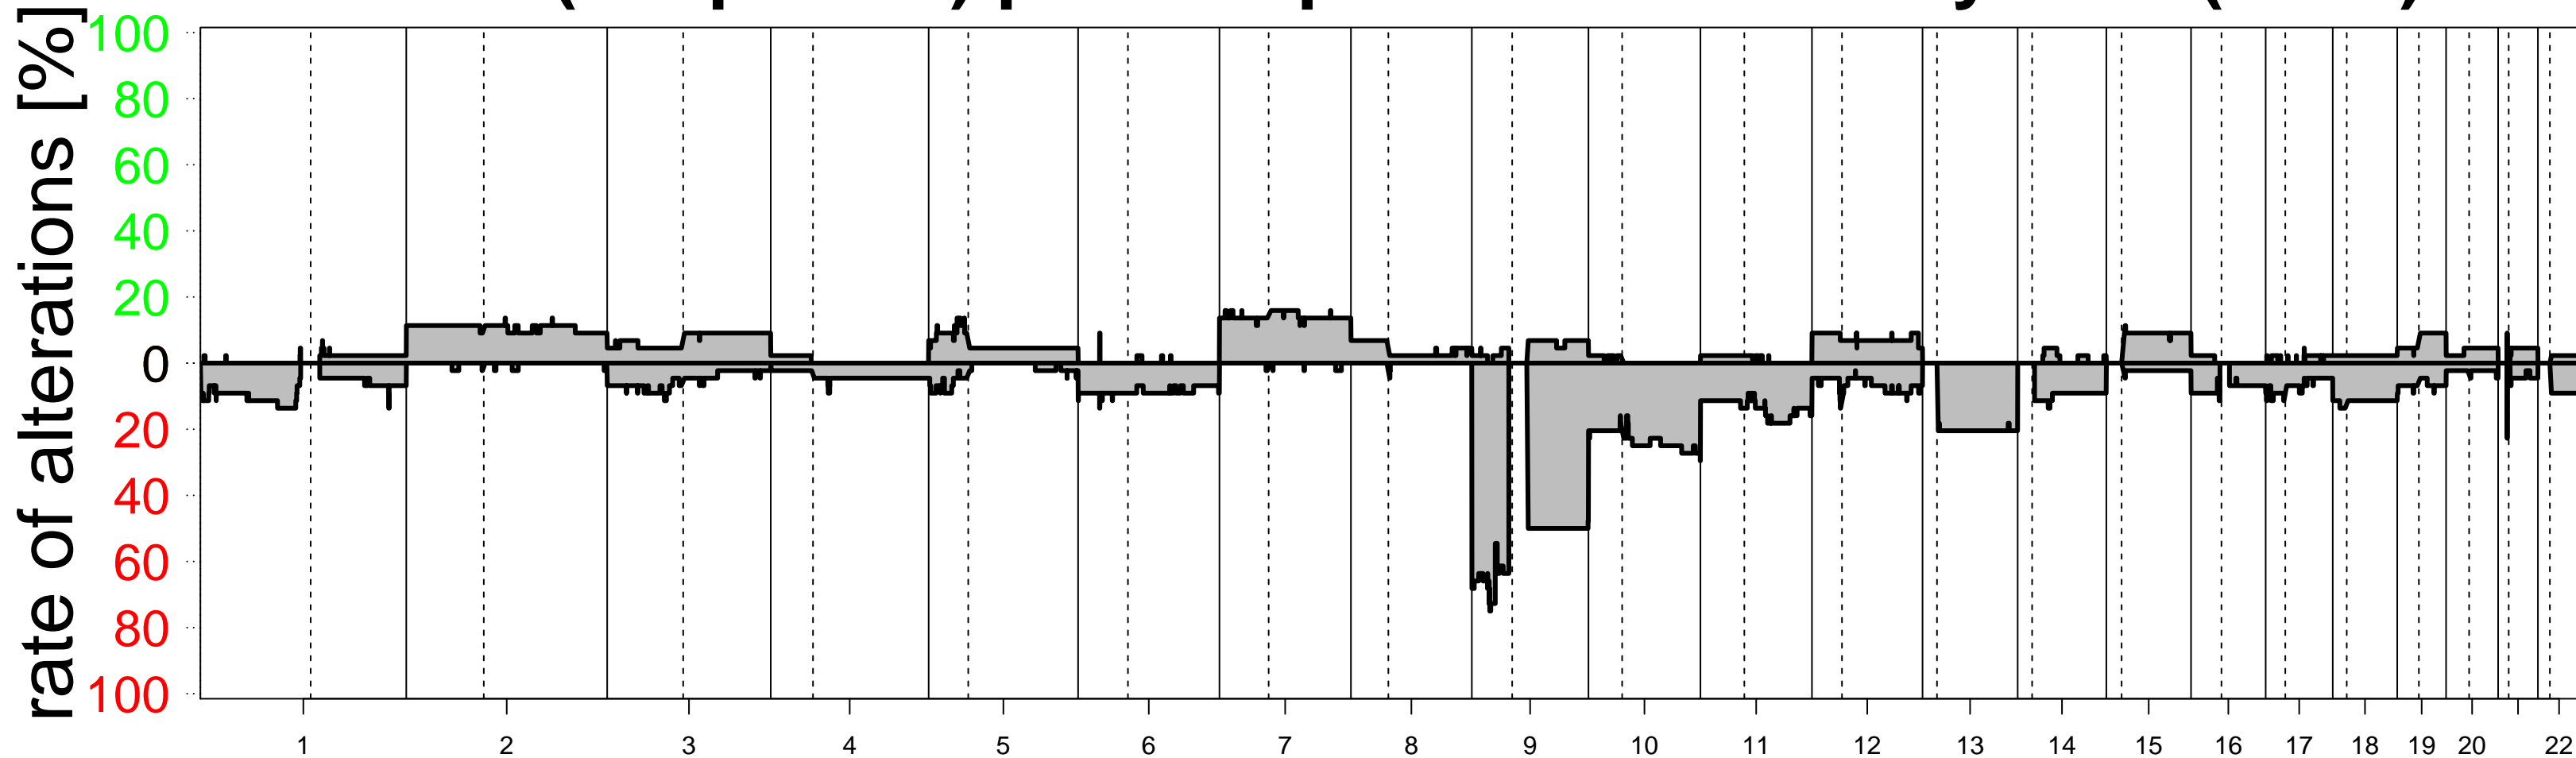

# m. c. atypical teratoid-rhabdoid tumor, subclass MYC (n=29)

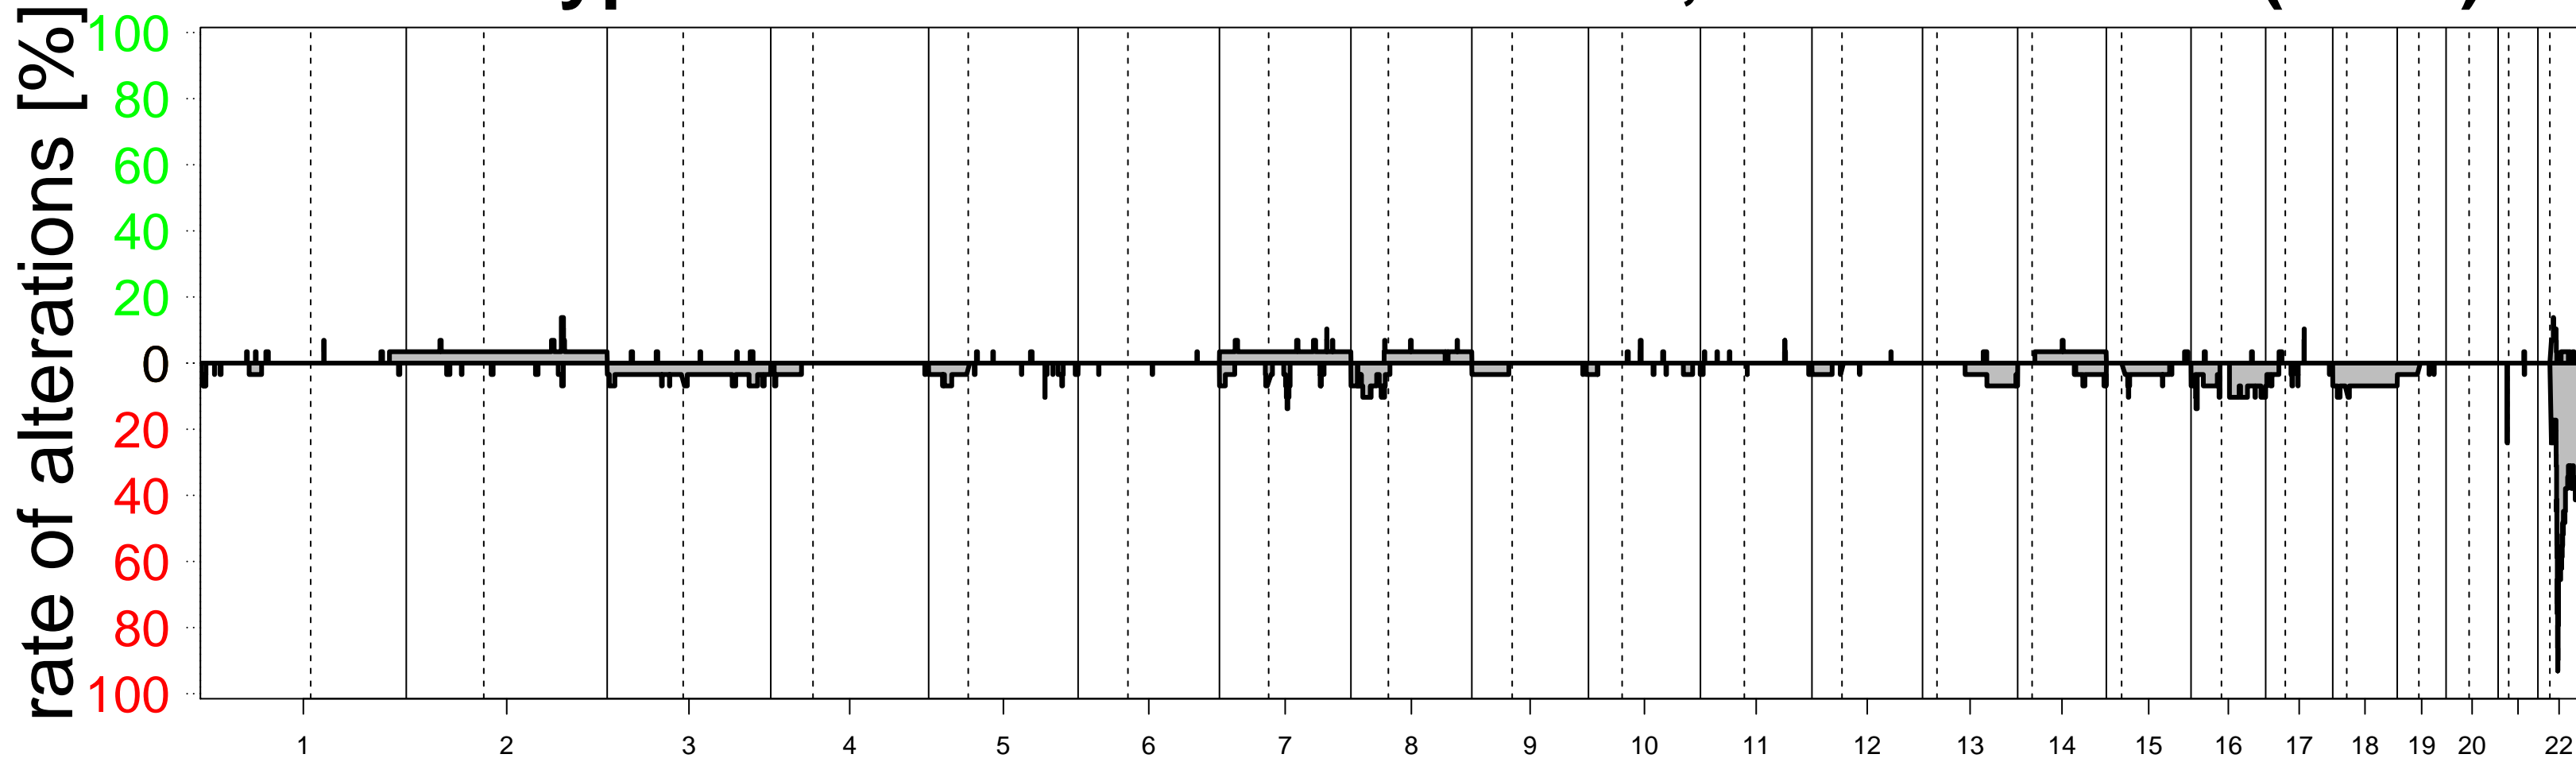

# m. c. atypical teratoid–rhabdoid tumor, subclass SHH (n=46)

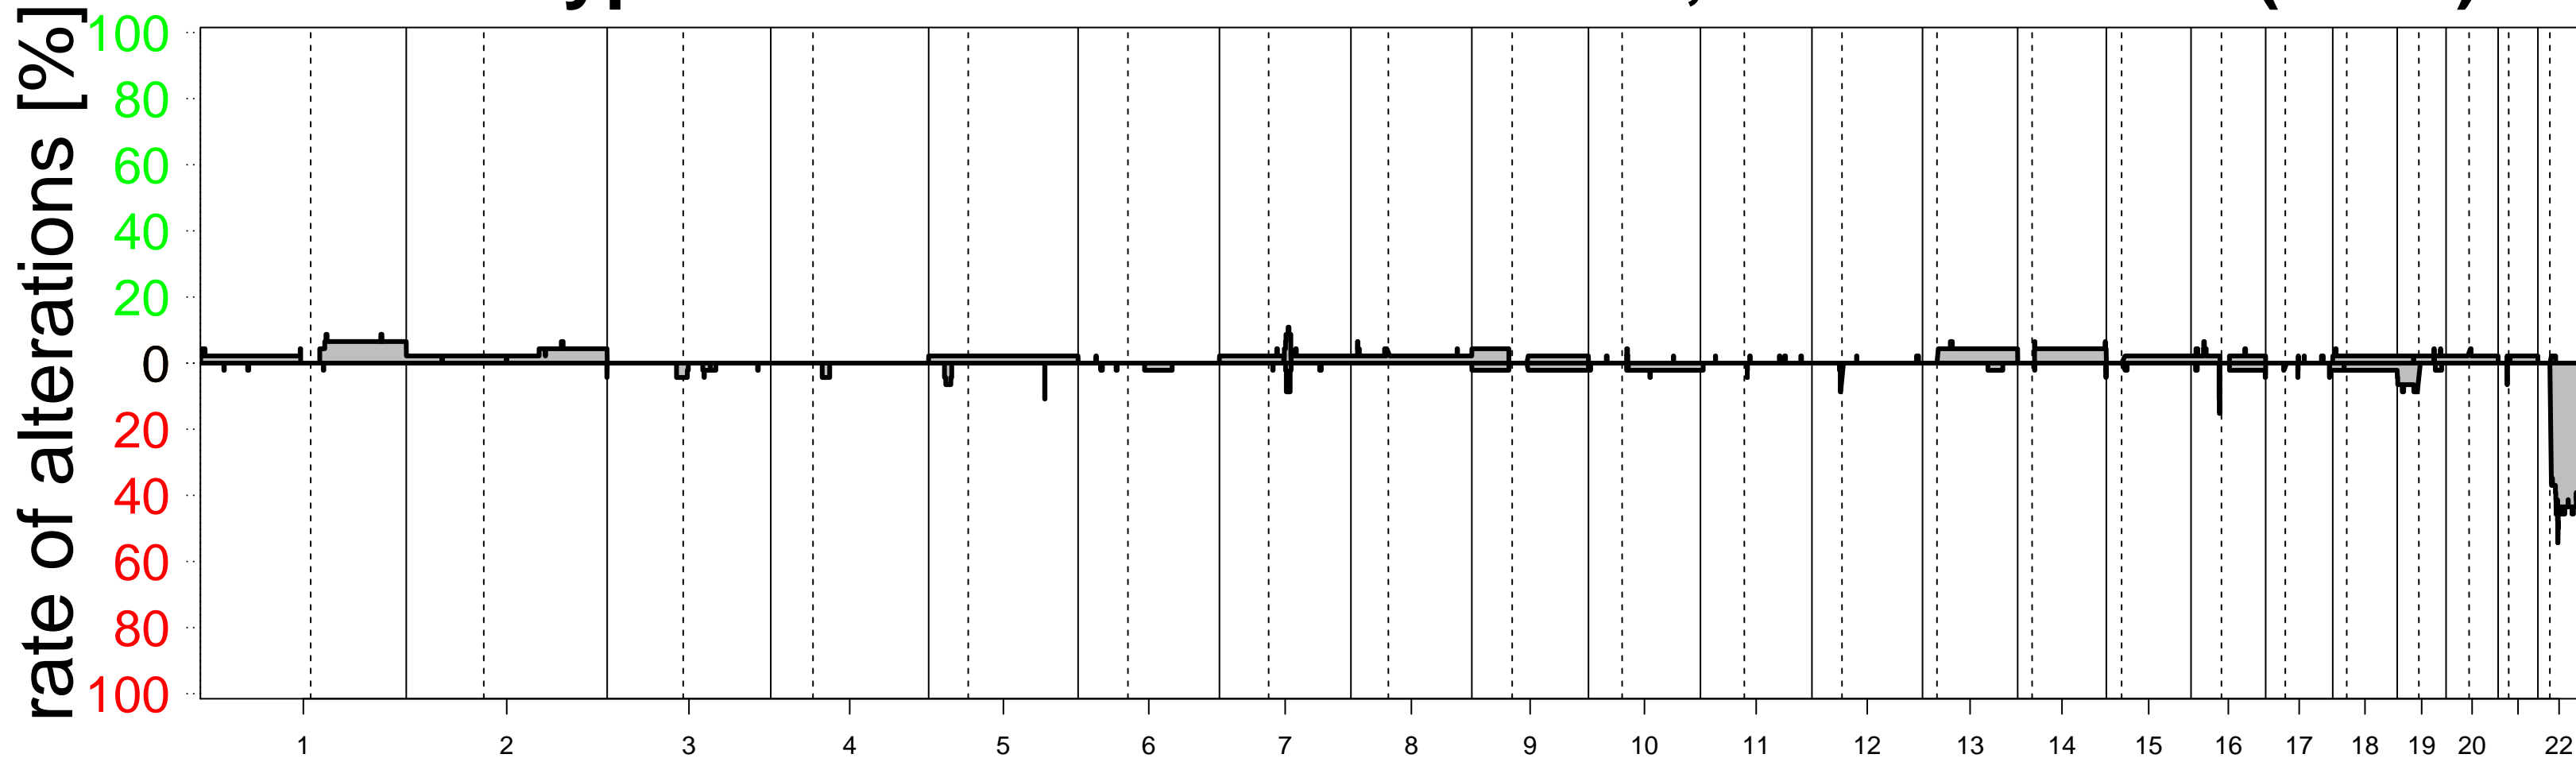

# m. c. atypical teratoid–rhabdoid tumor, subclass TYR (n=37)

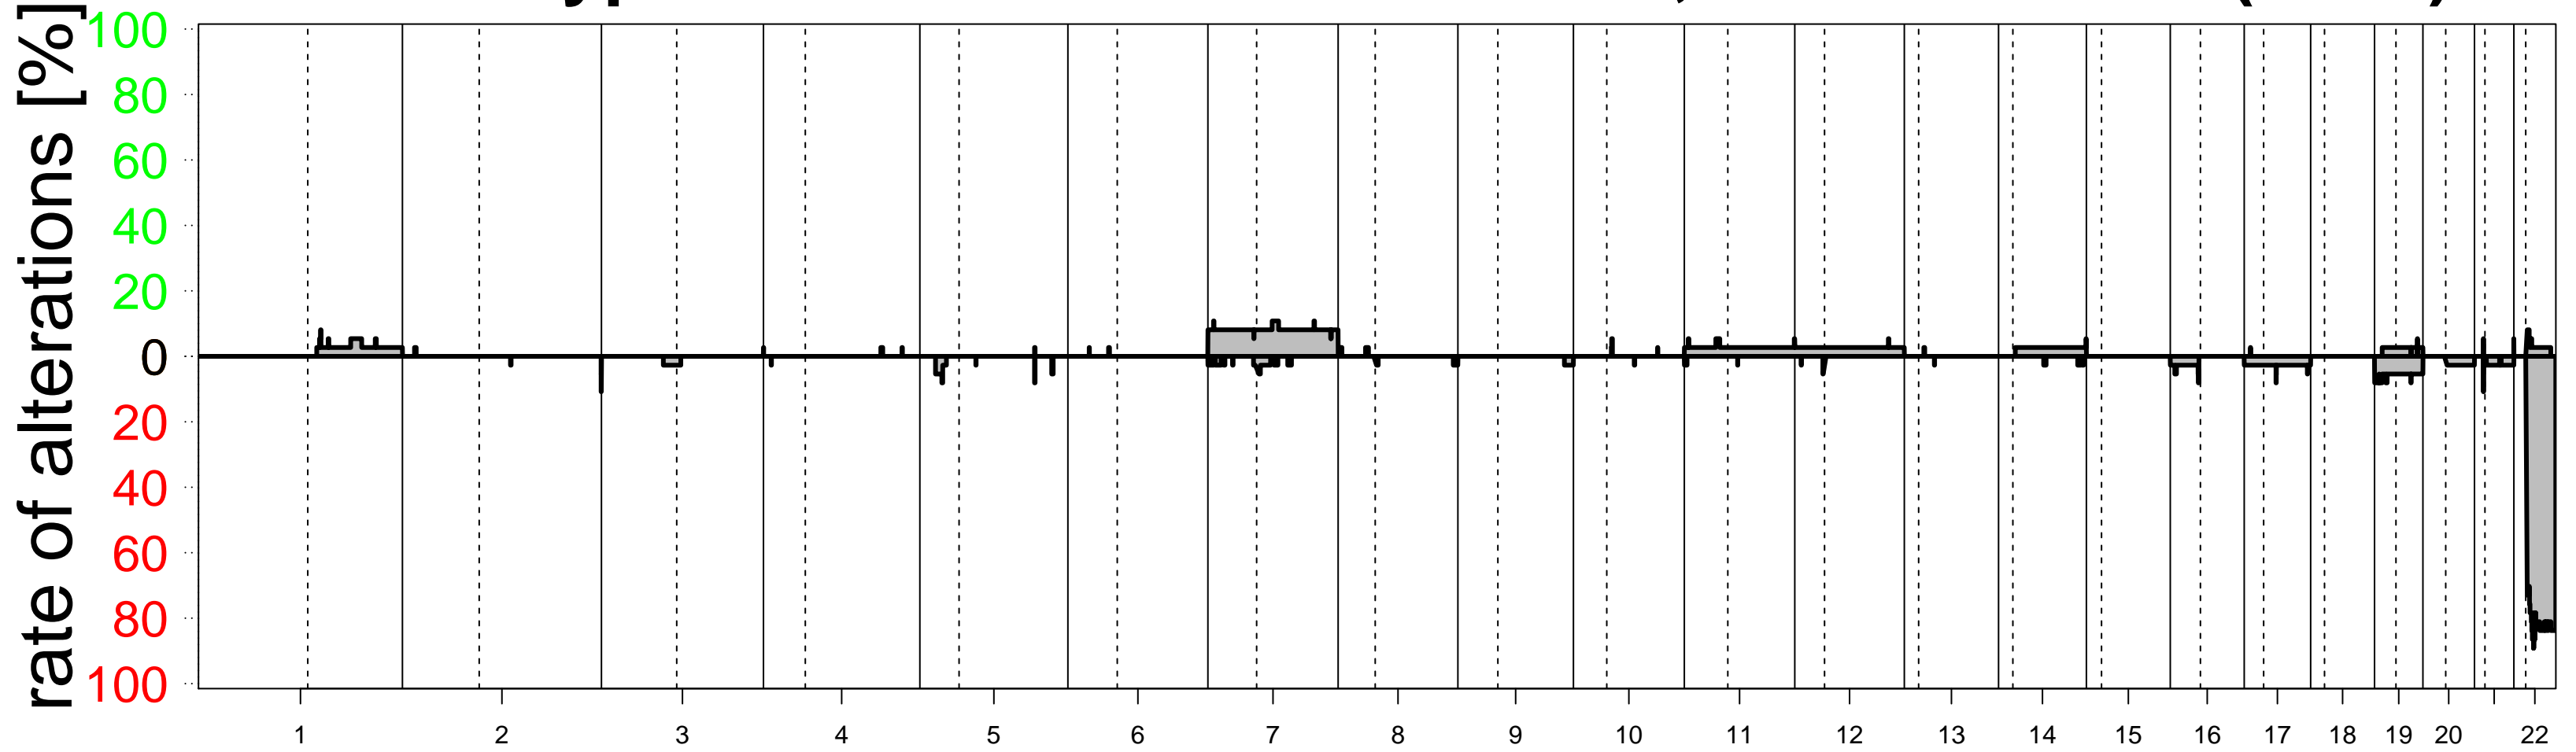

# m. c. central neurocytoma (n=21)

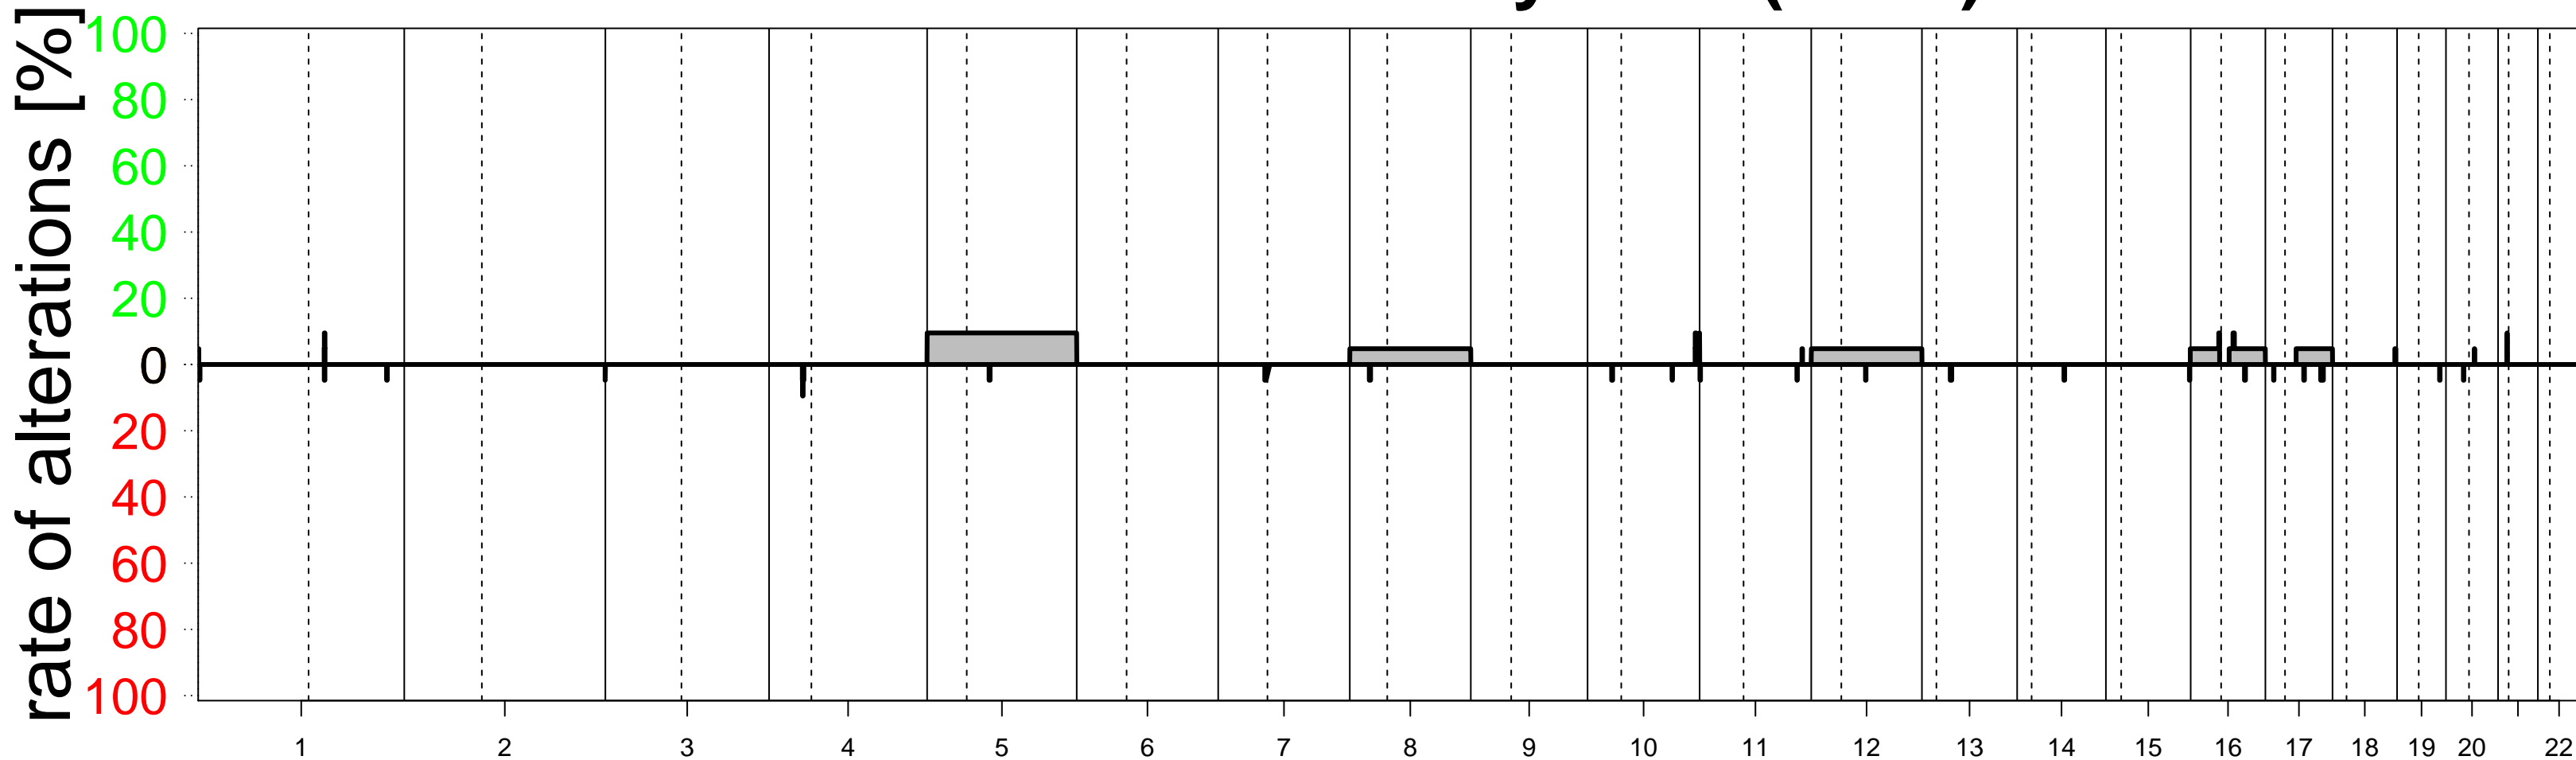

# m. c. cerebellar liponeurocytoma (n=10)

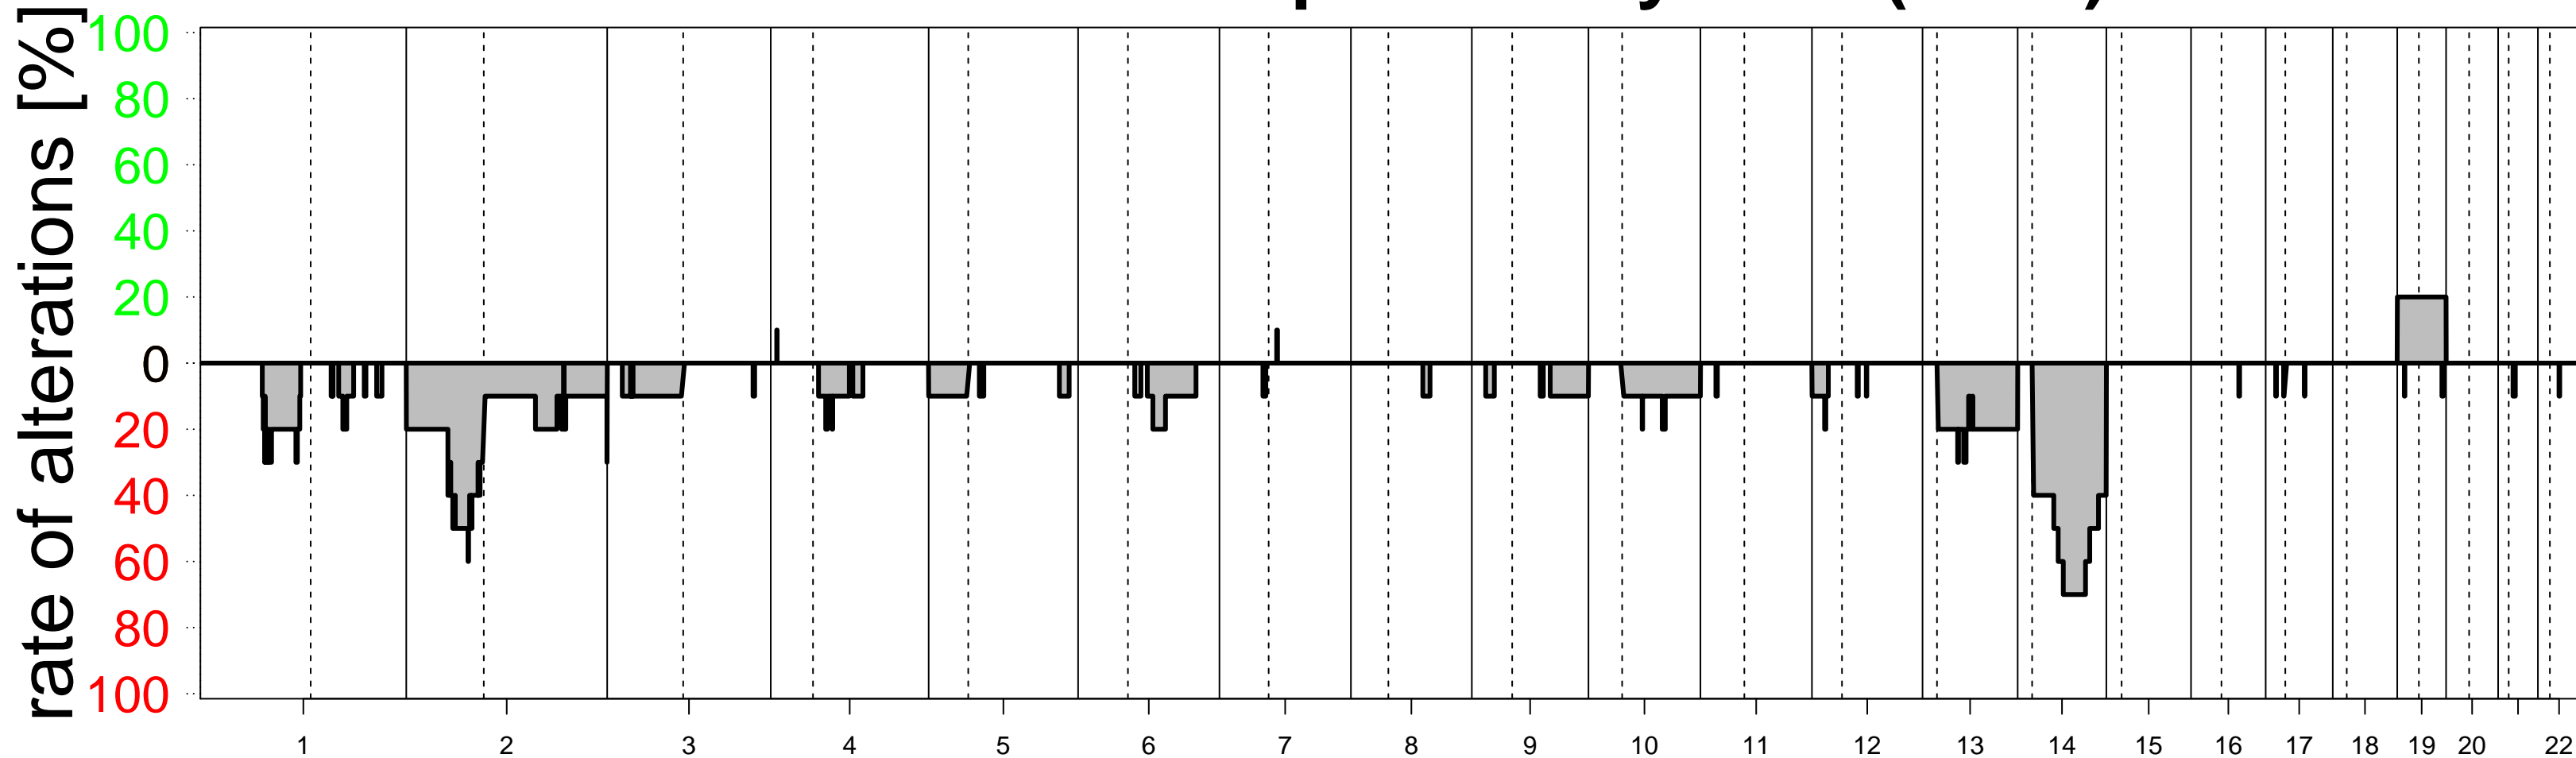

# m. c. chordoid glioma of the third ventricle (n=12)

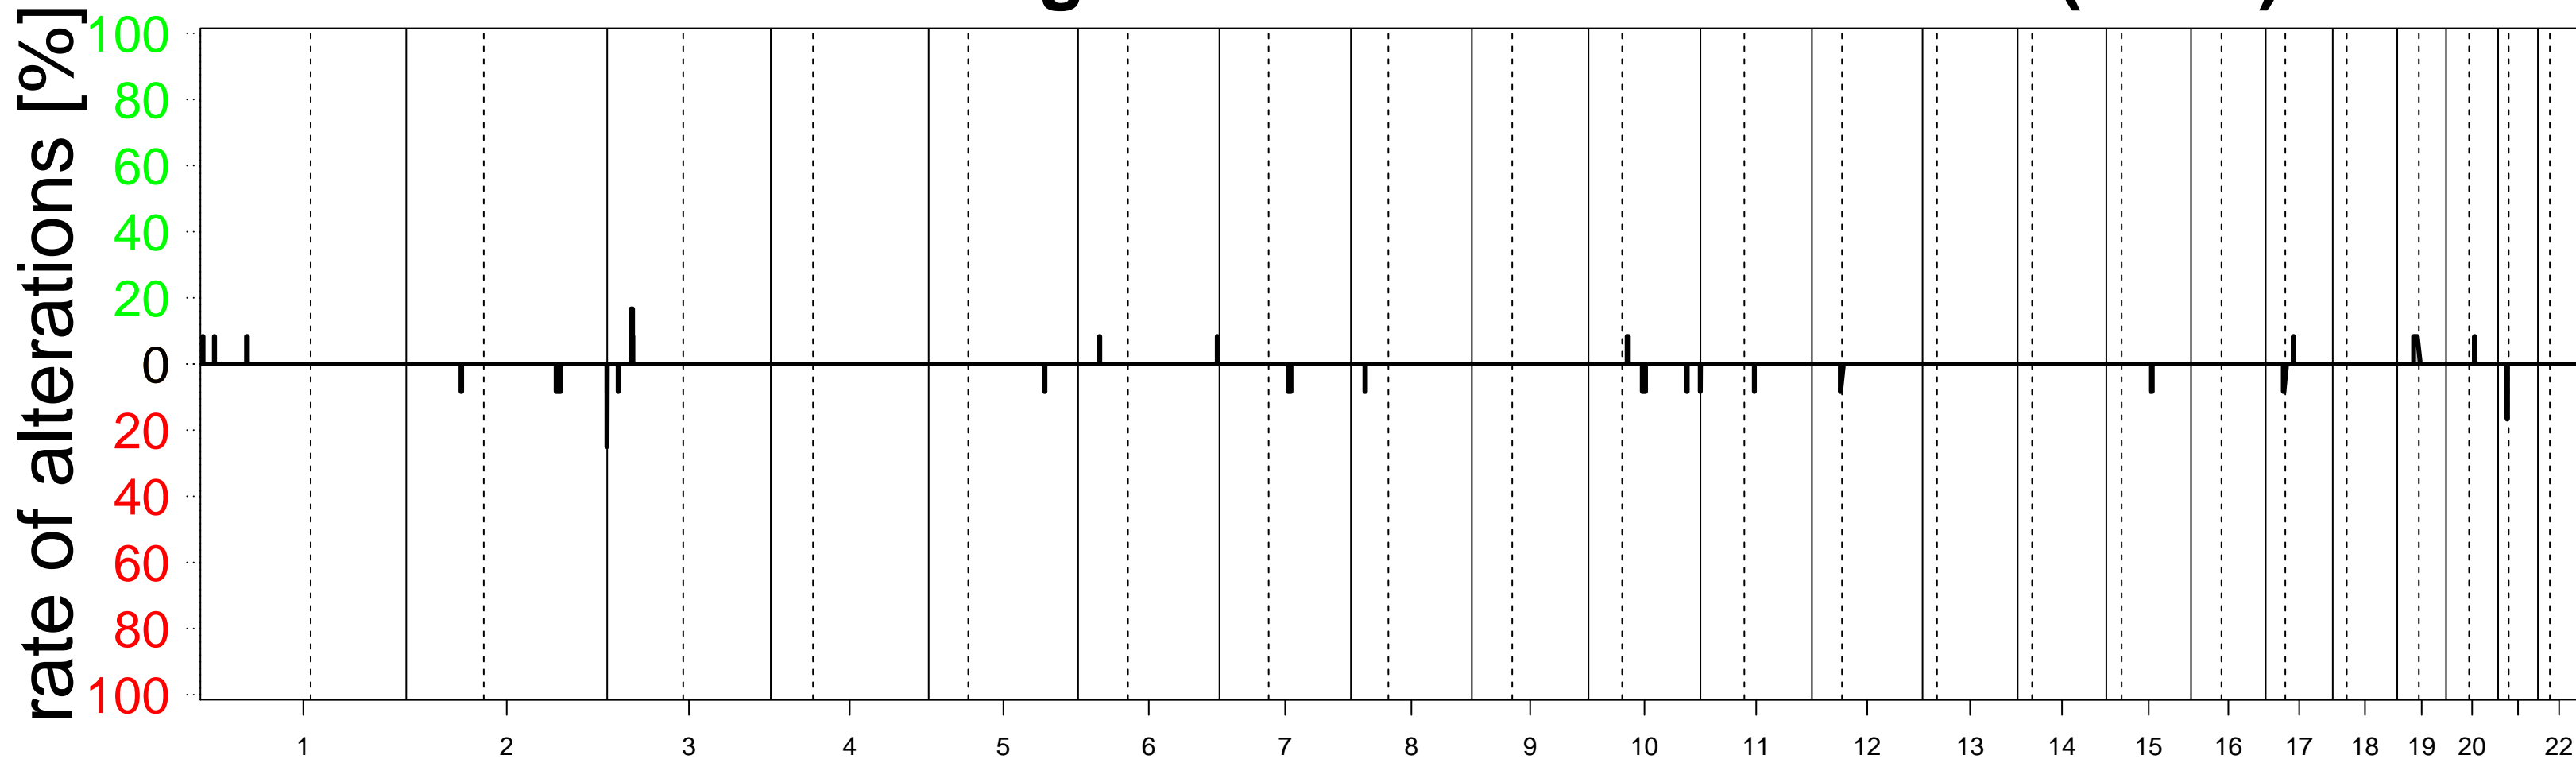



# m. c. chordoma (n=9)

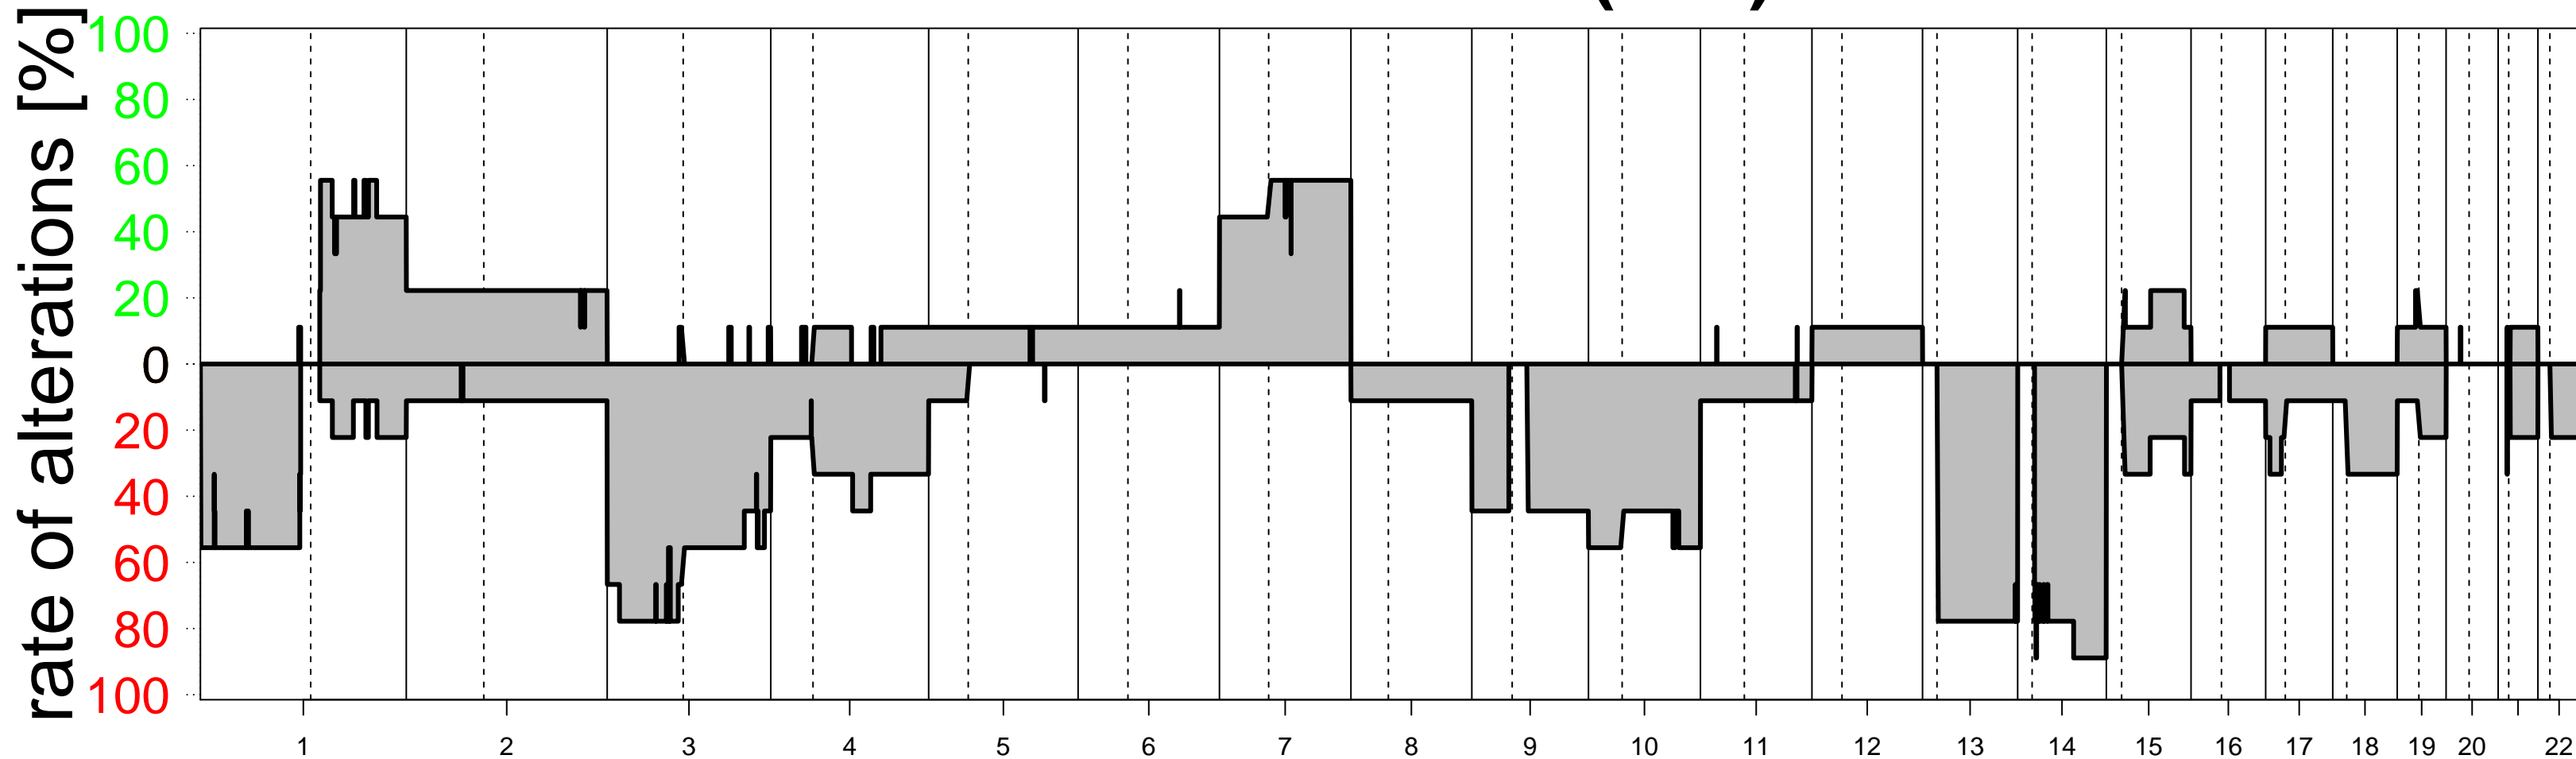

# m. c. CNS Ewing sarcoma family tumor with CIC alteration (n=13)

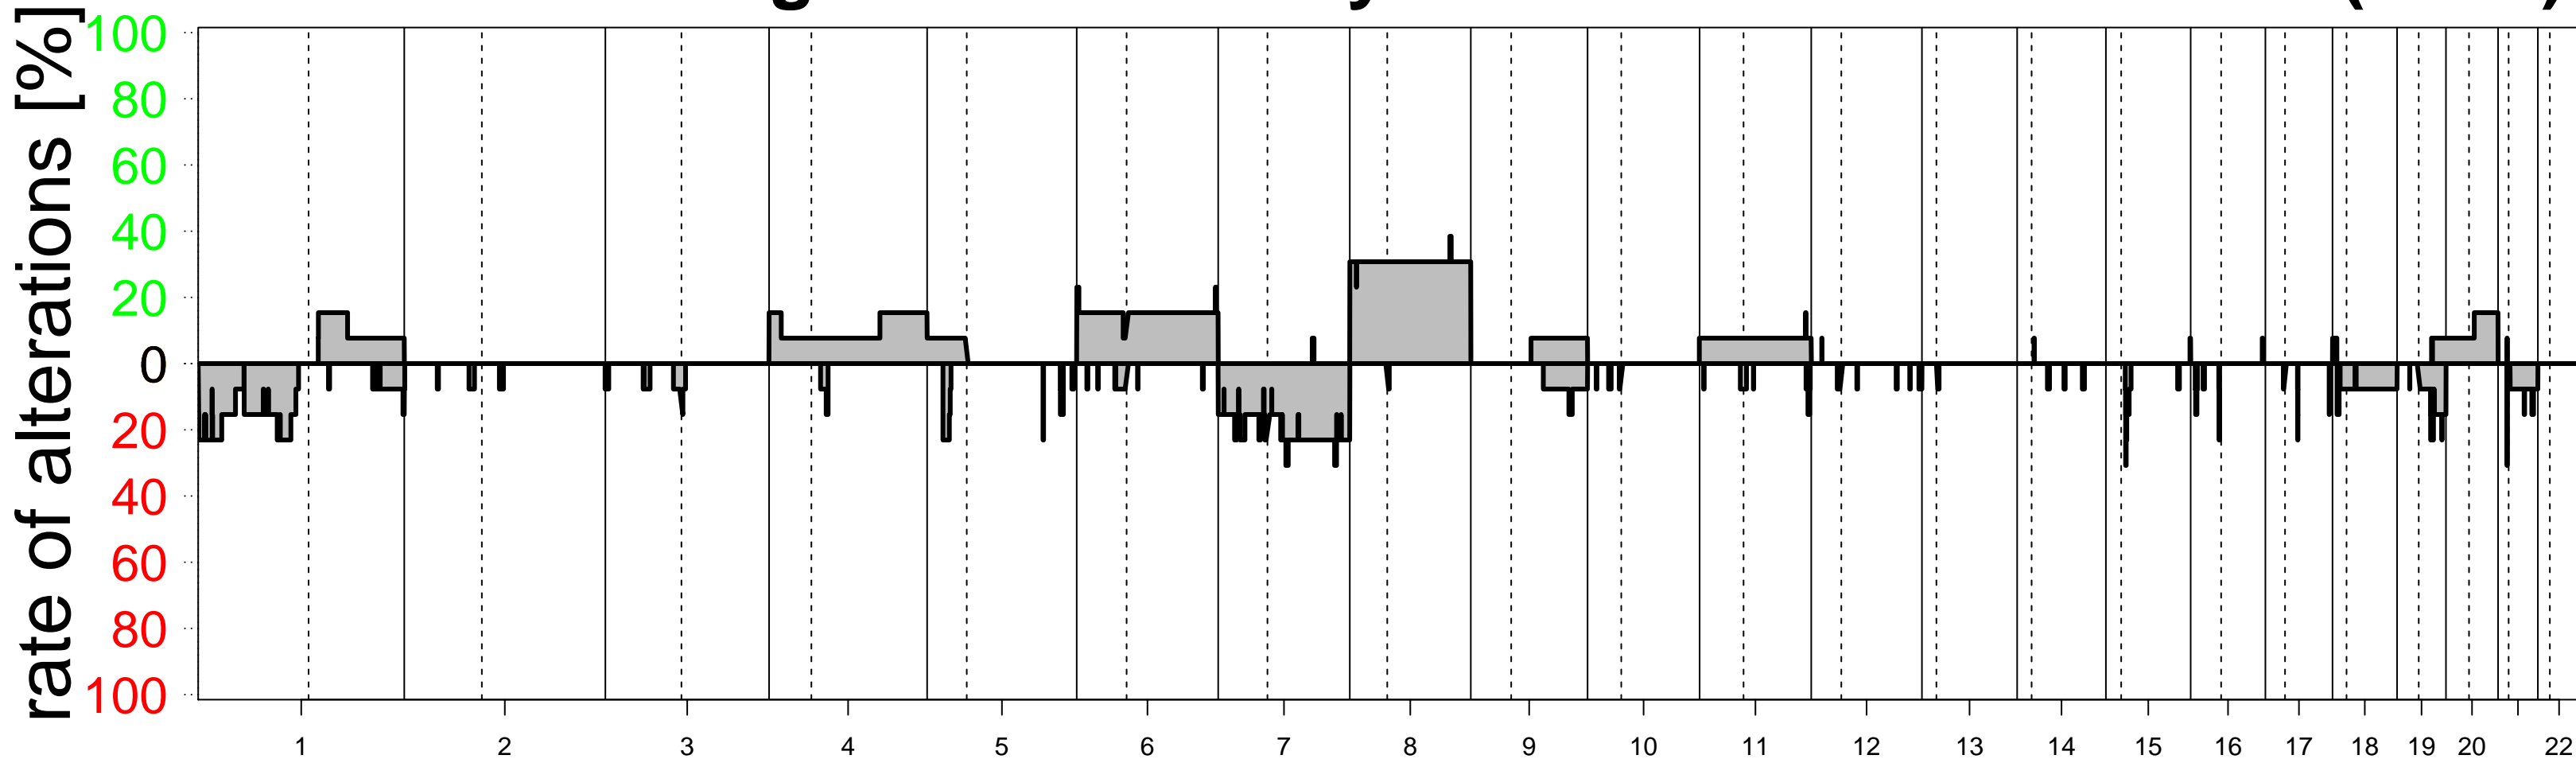

# m. c. CNS high grade neuroepithelial tumor with BCOR alteration (n=23)

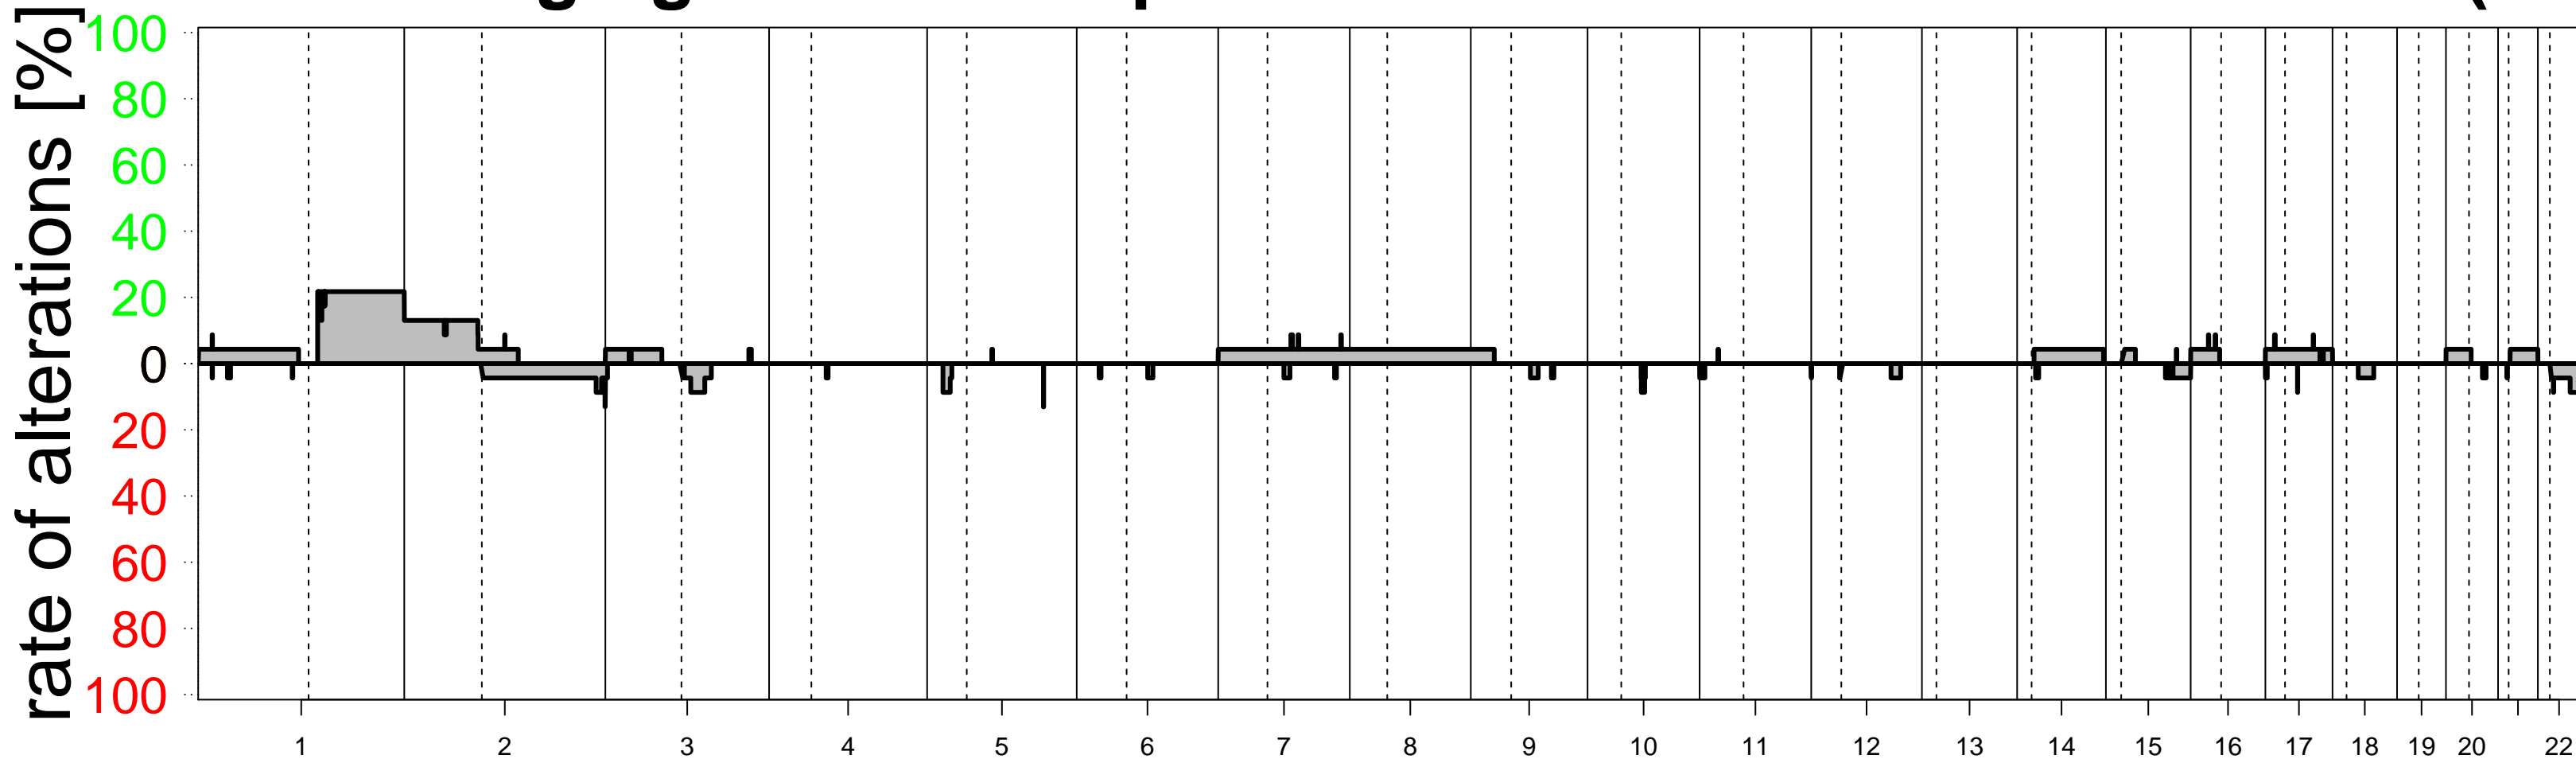

# m. c. CNS high grade neuroepithelial tumor with MN1 alteration (n=21)

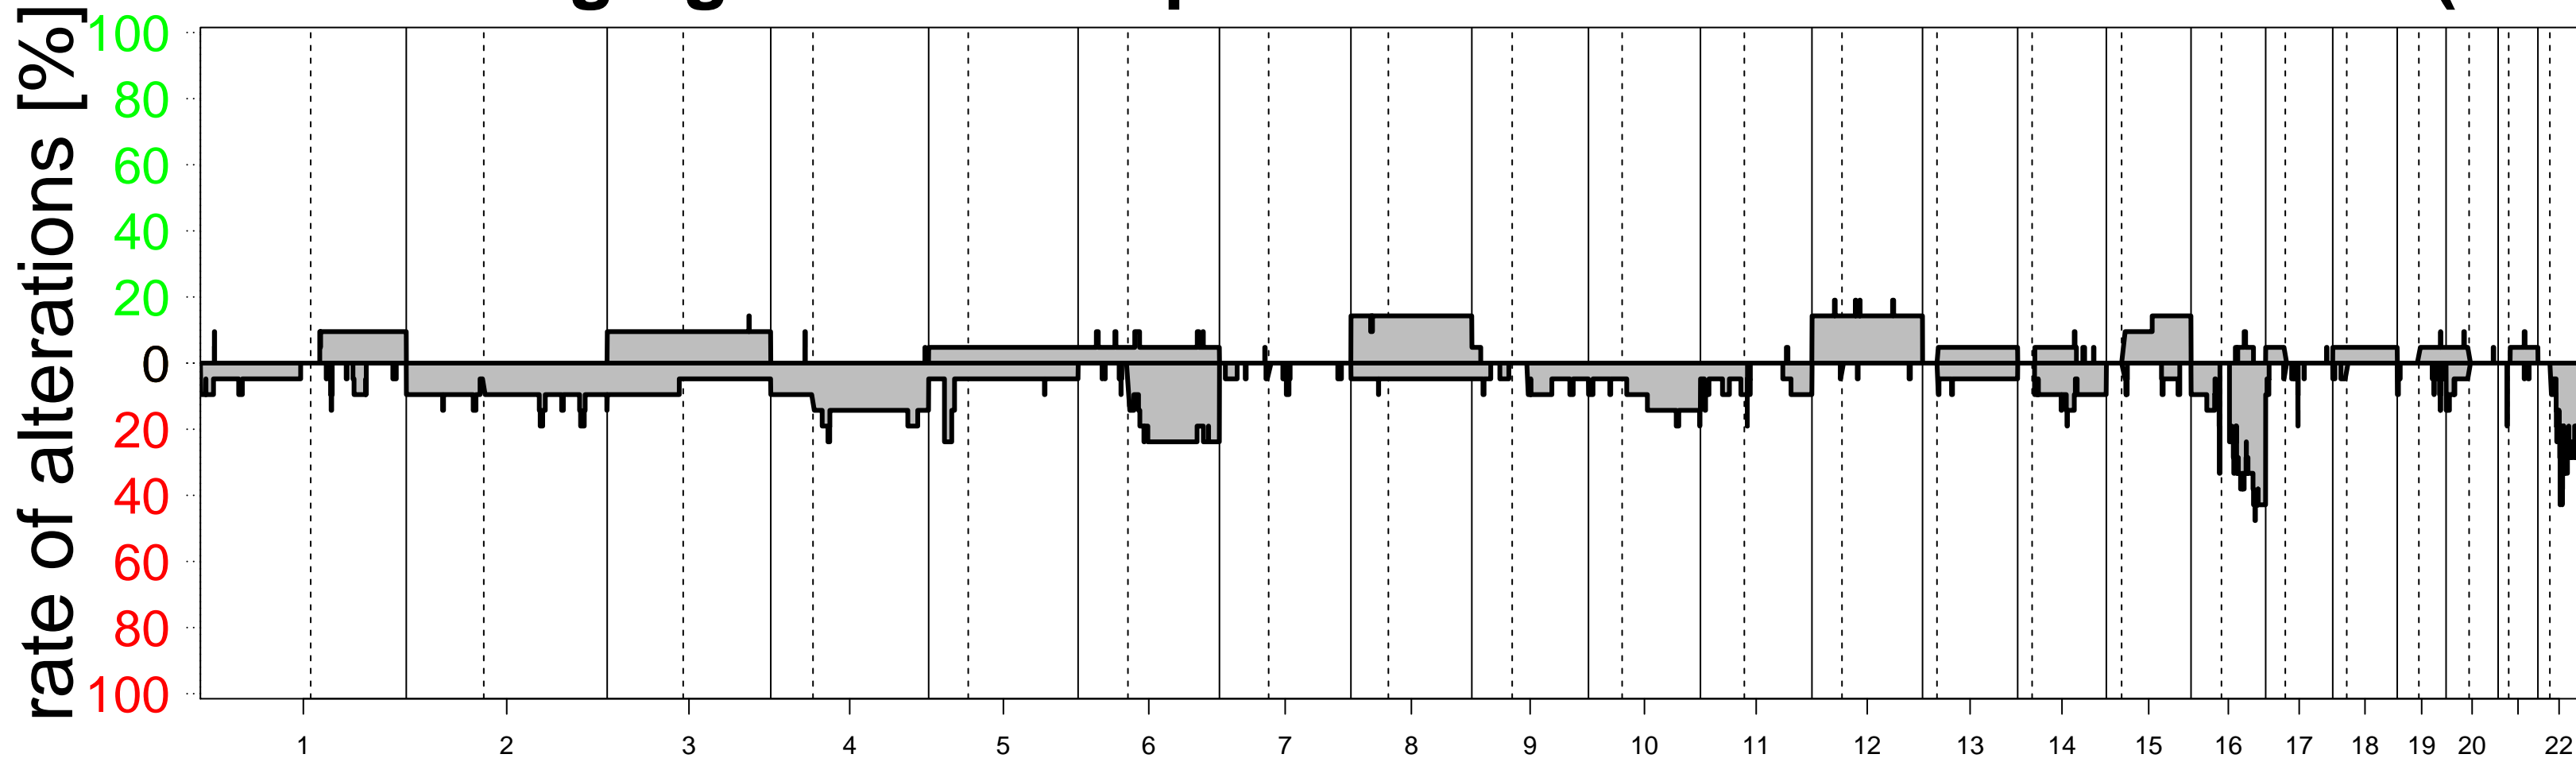

# m. c. CNS neuroblastoma with FOXR2 activation (n=39)

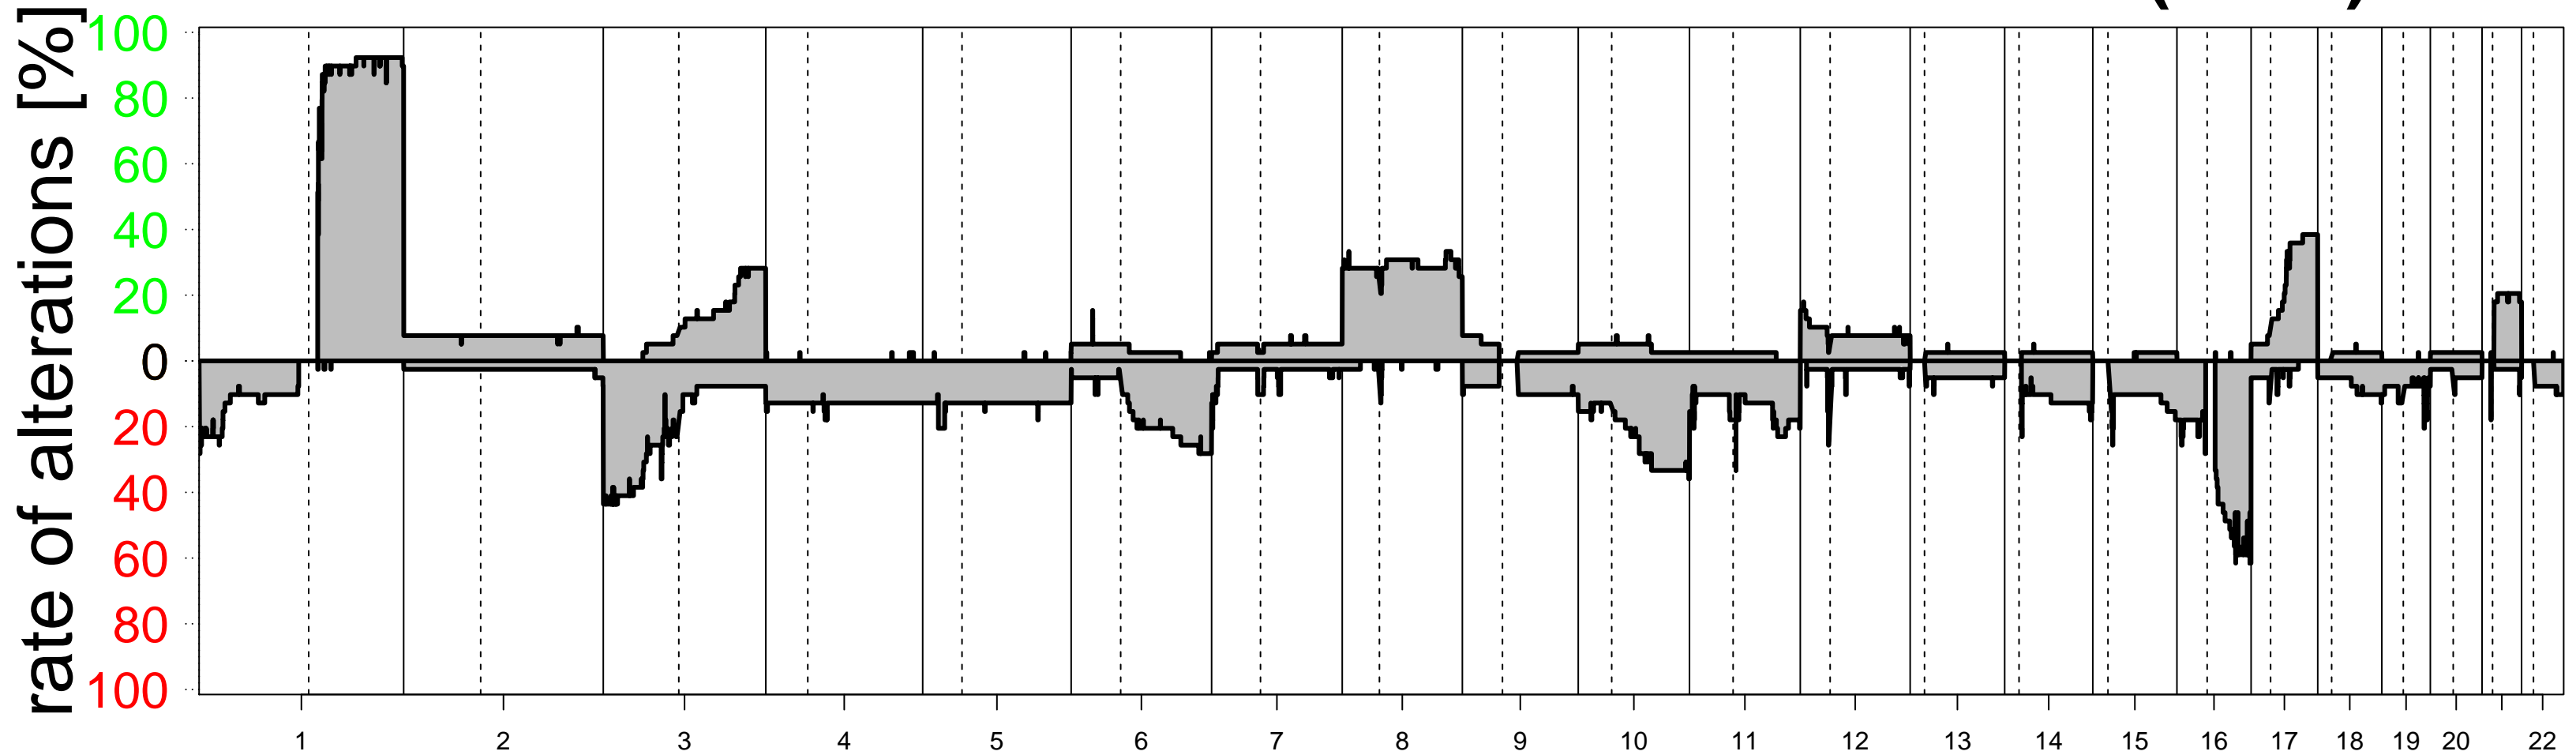

# m. c. craniopharyngioma, adamantinomatous (n=25)

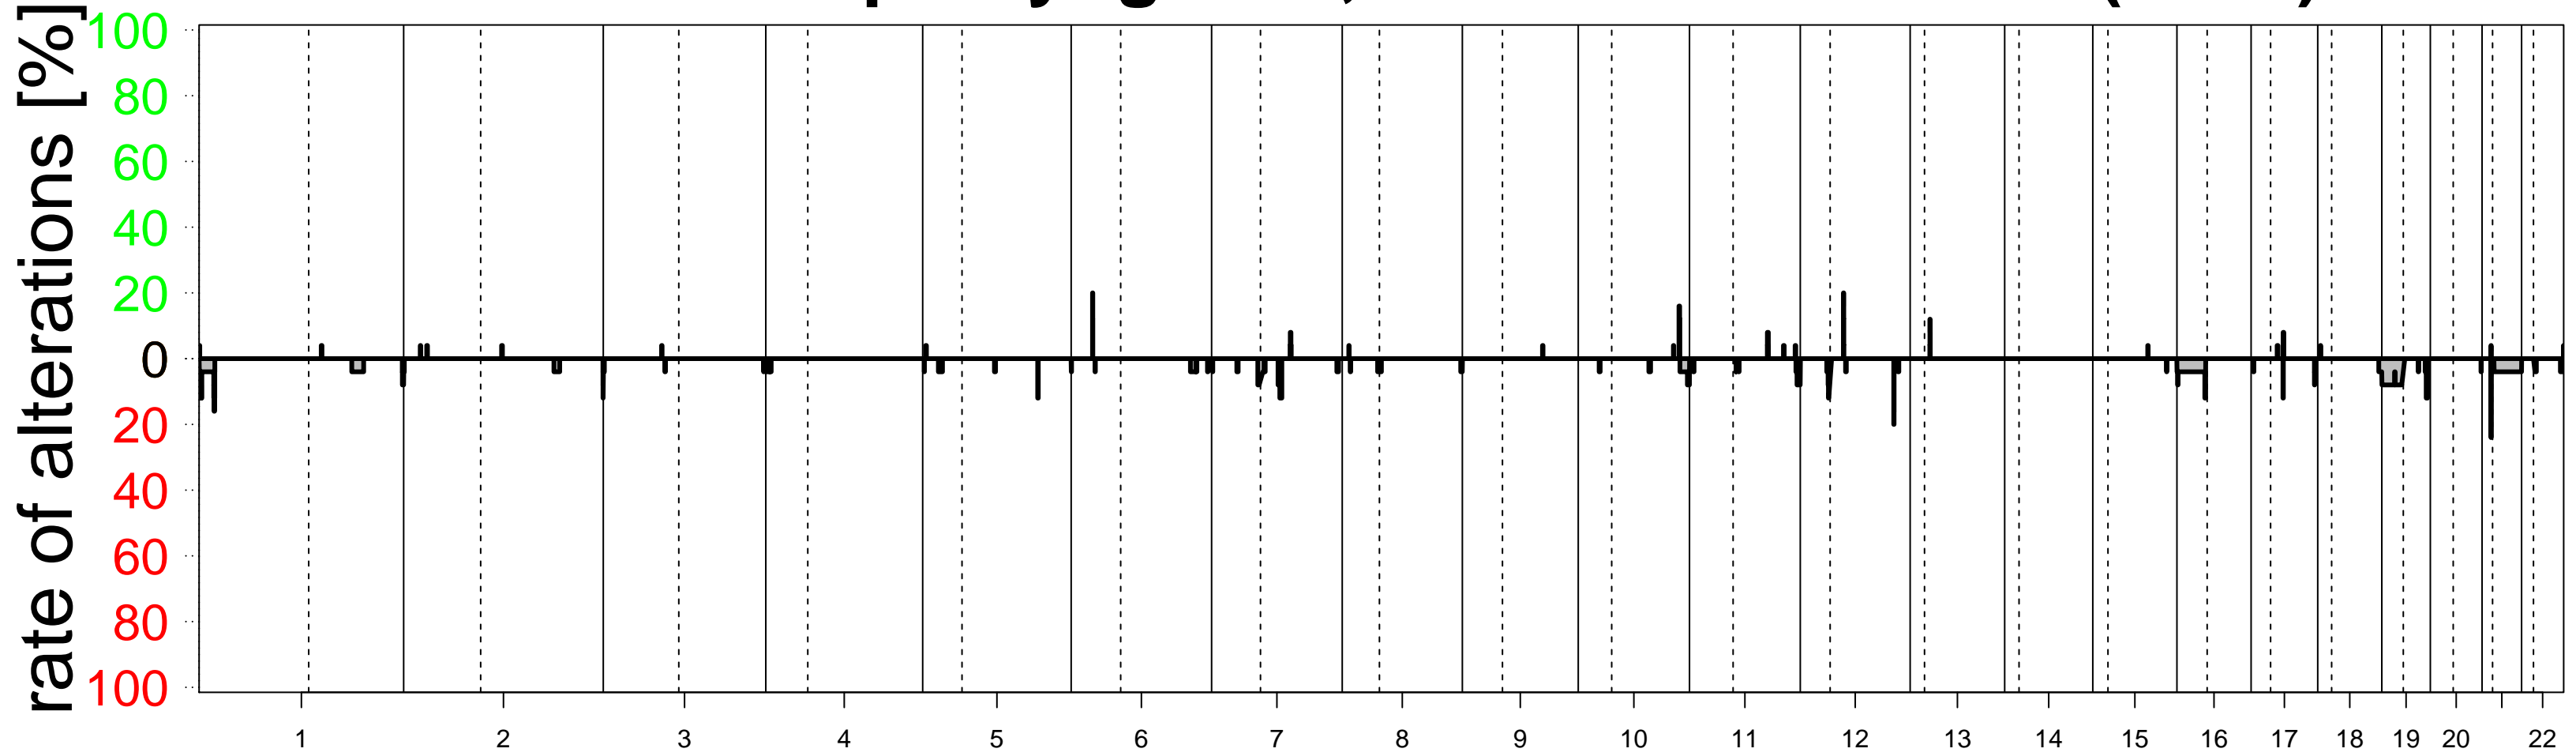

# m. c. craniopharyngioma, papillary (n=20)

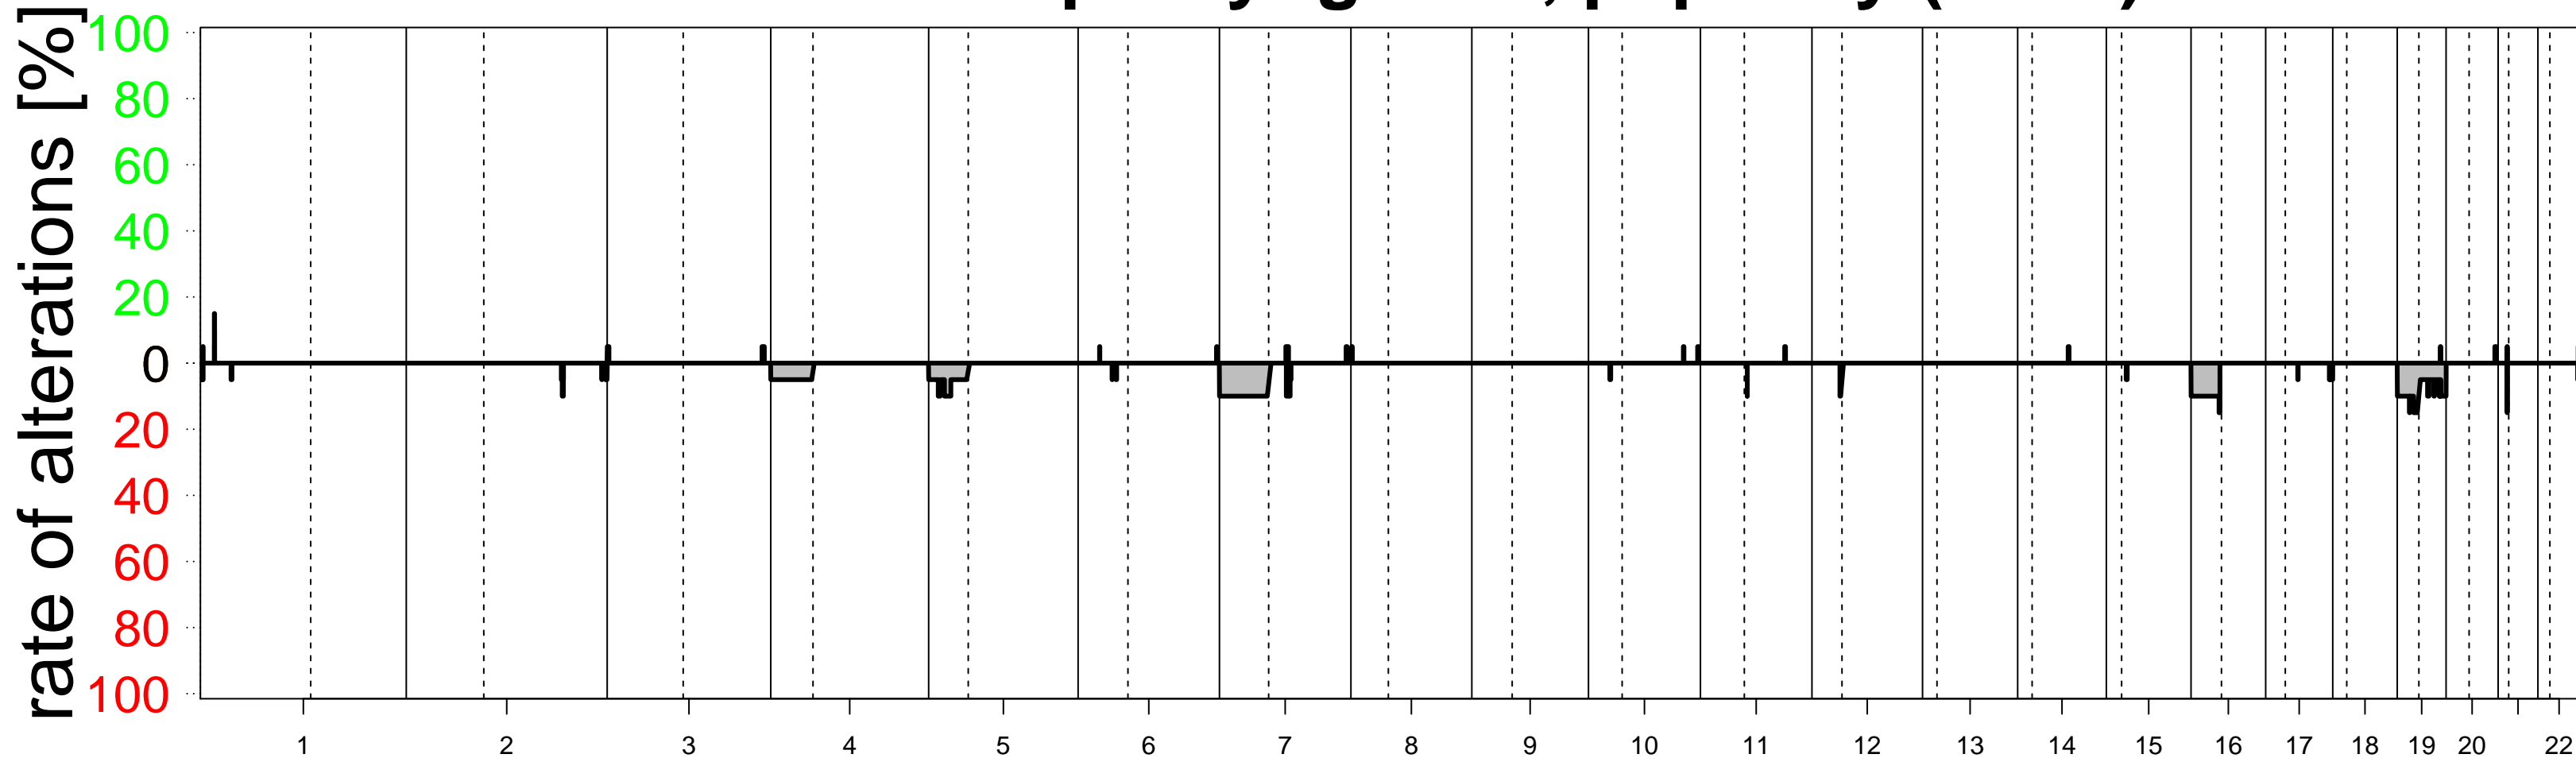





# m. c. diffuse midline glioma H3 K27M mutant (n=78)

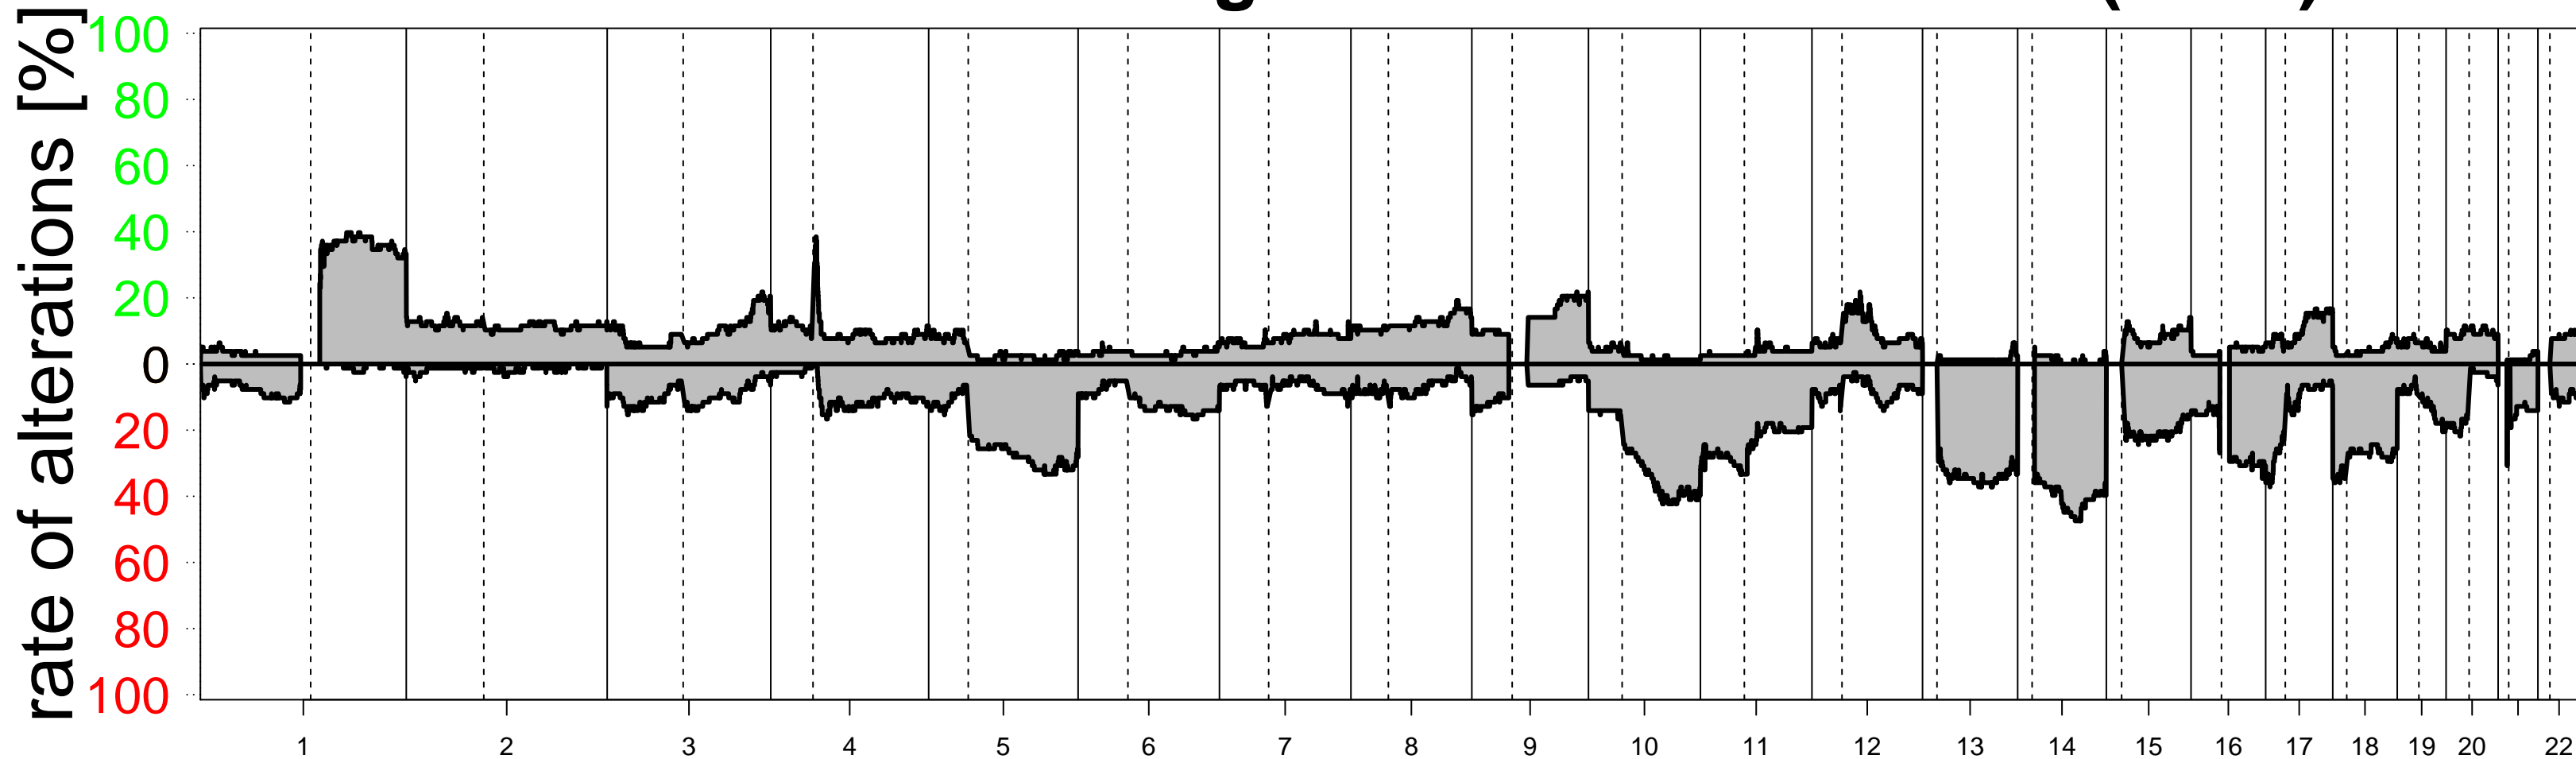

# m. c. embryonal tumor with multilayered rosettes (n=43)

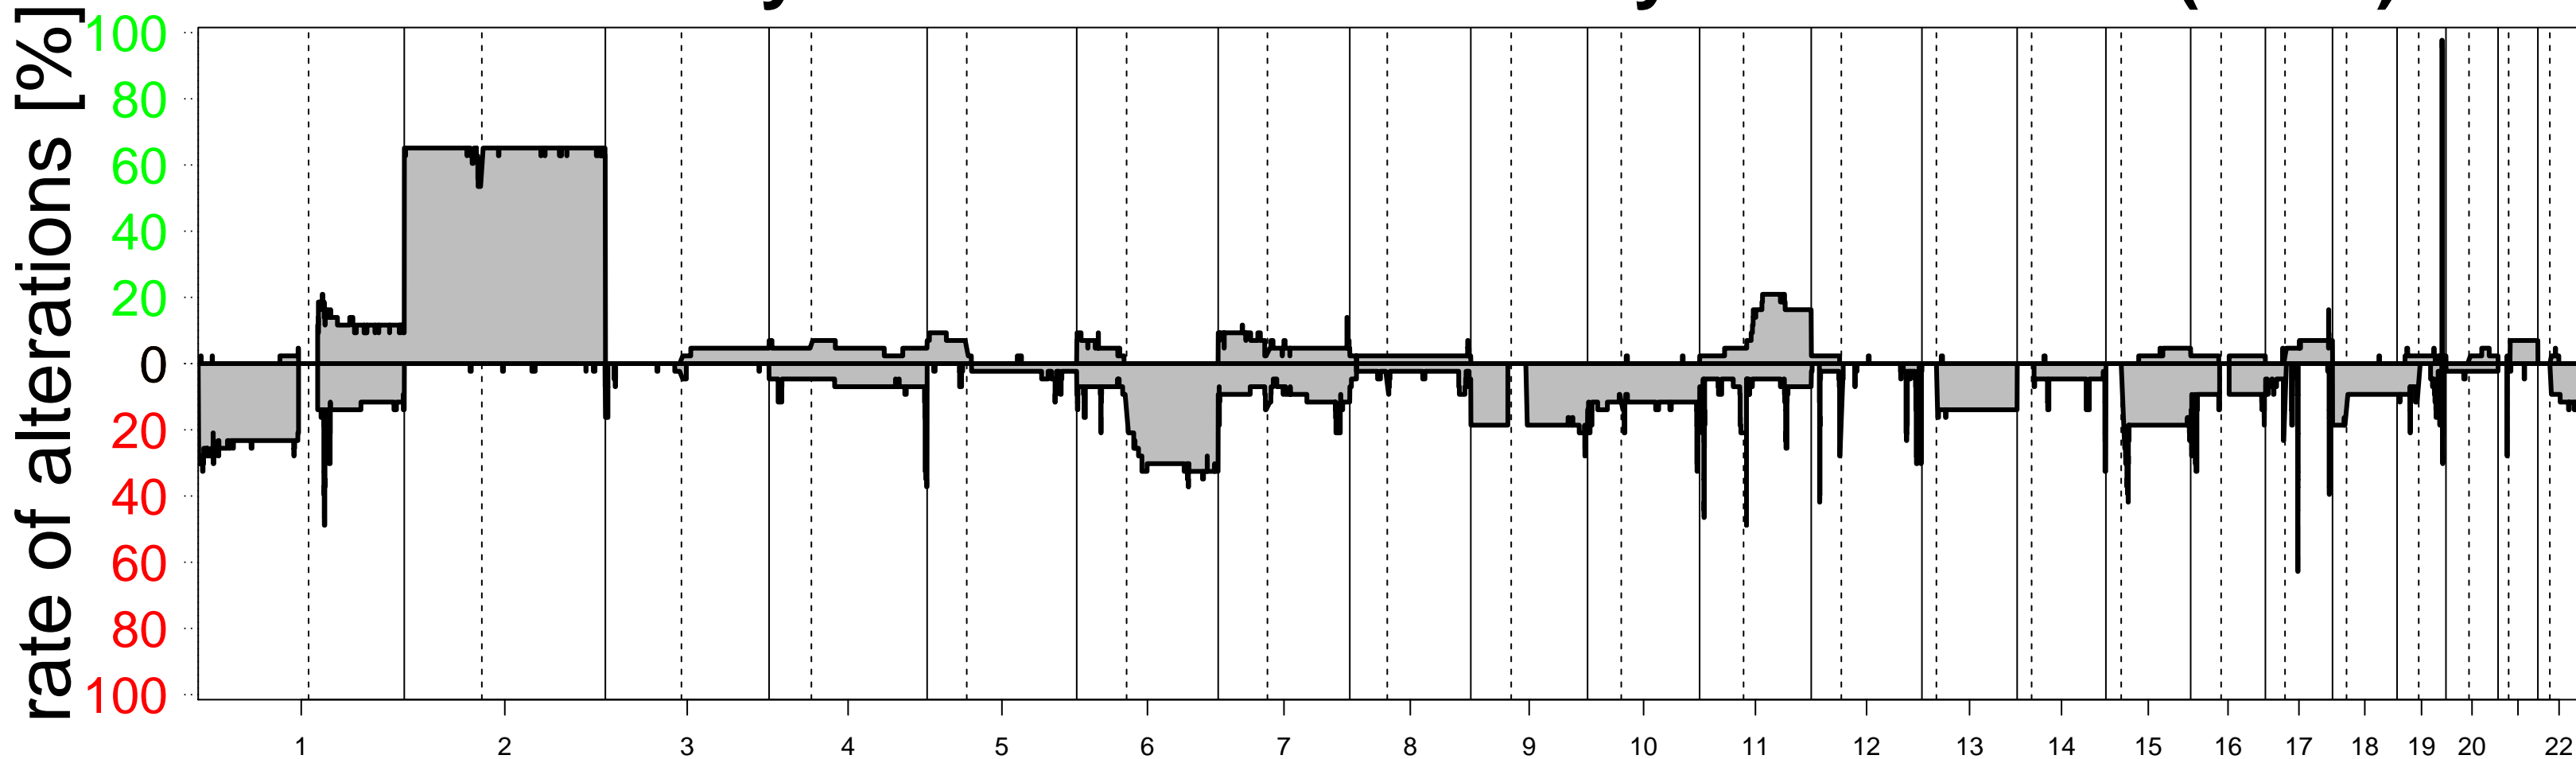

# m. c. ependymoma, myxopapillary (n=28)

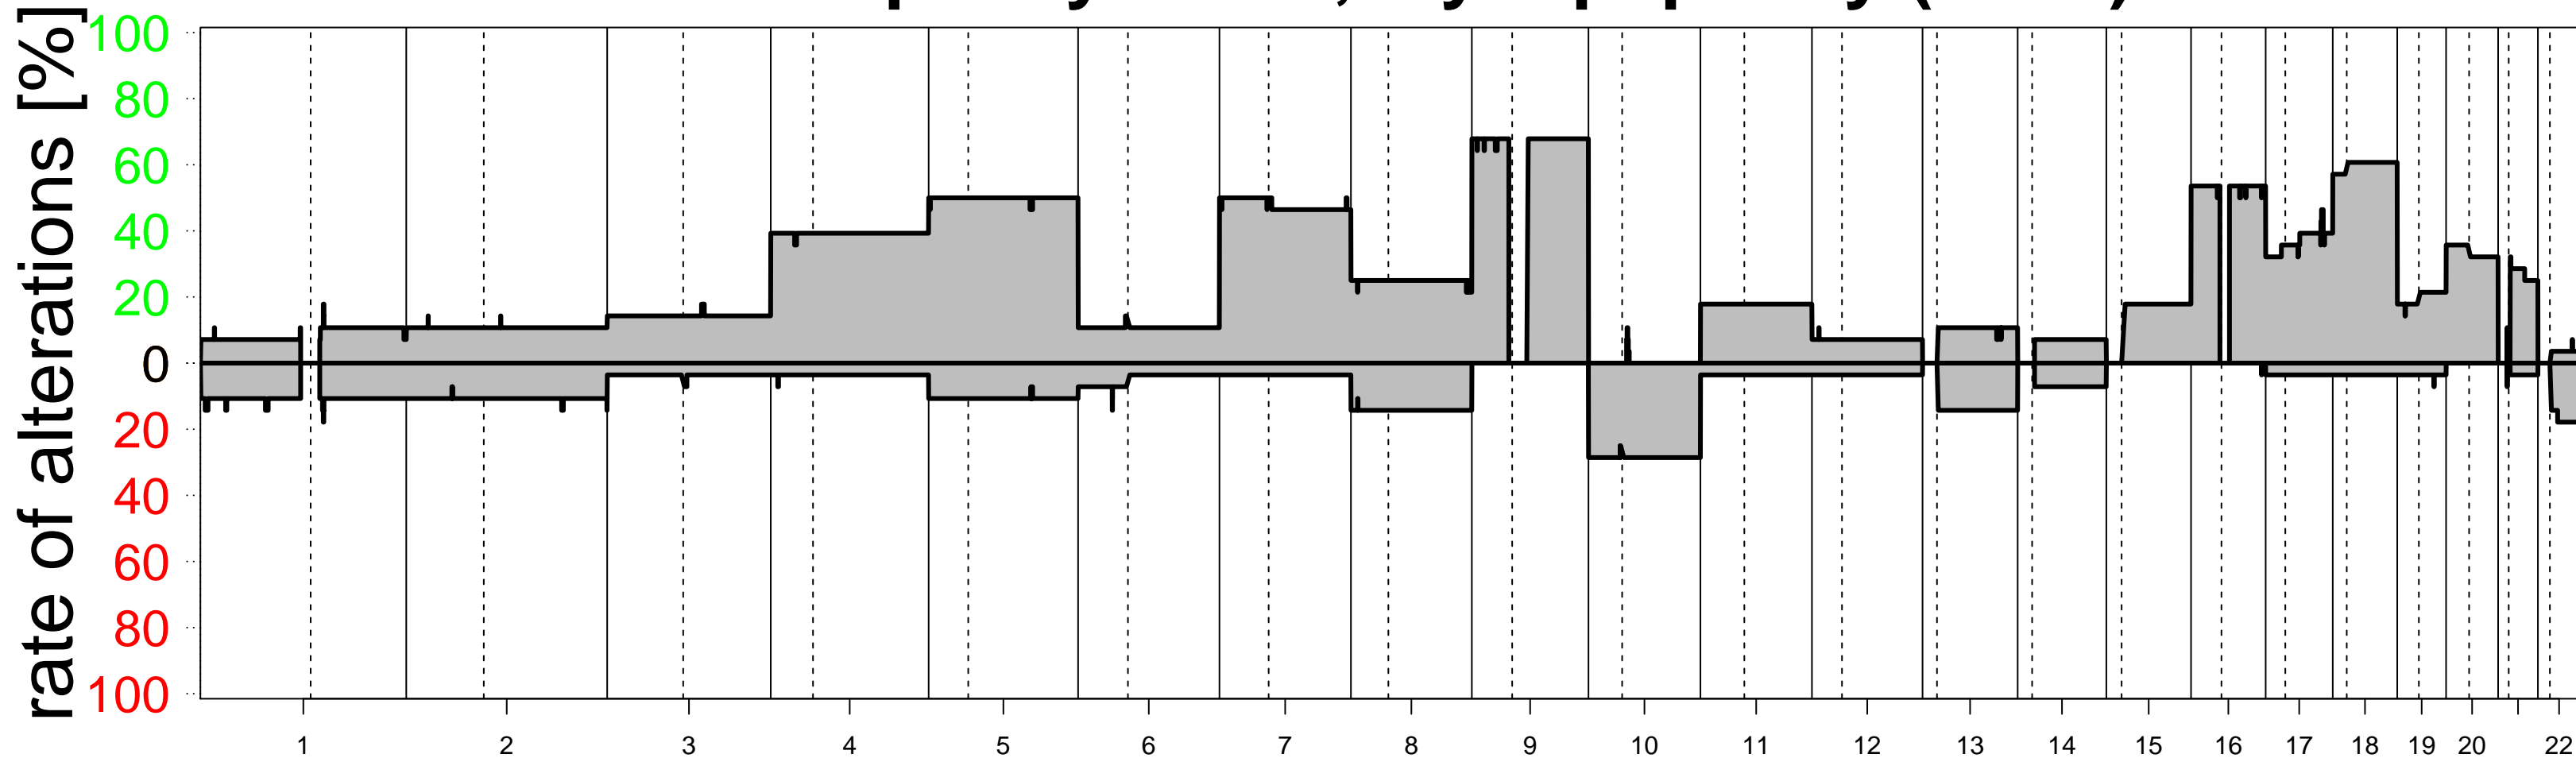

# m. c. ependymoma, posterior fossa group A (n=91)

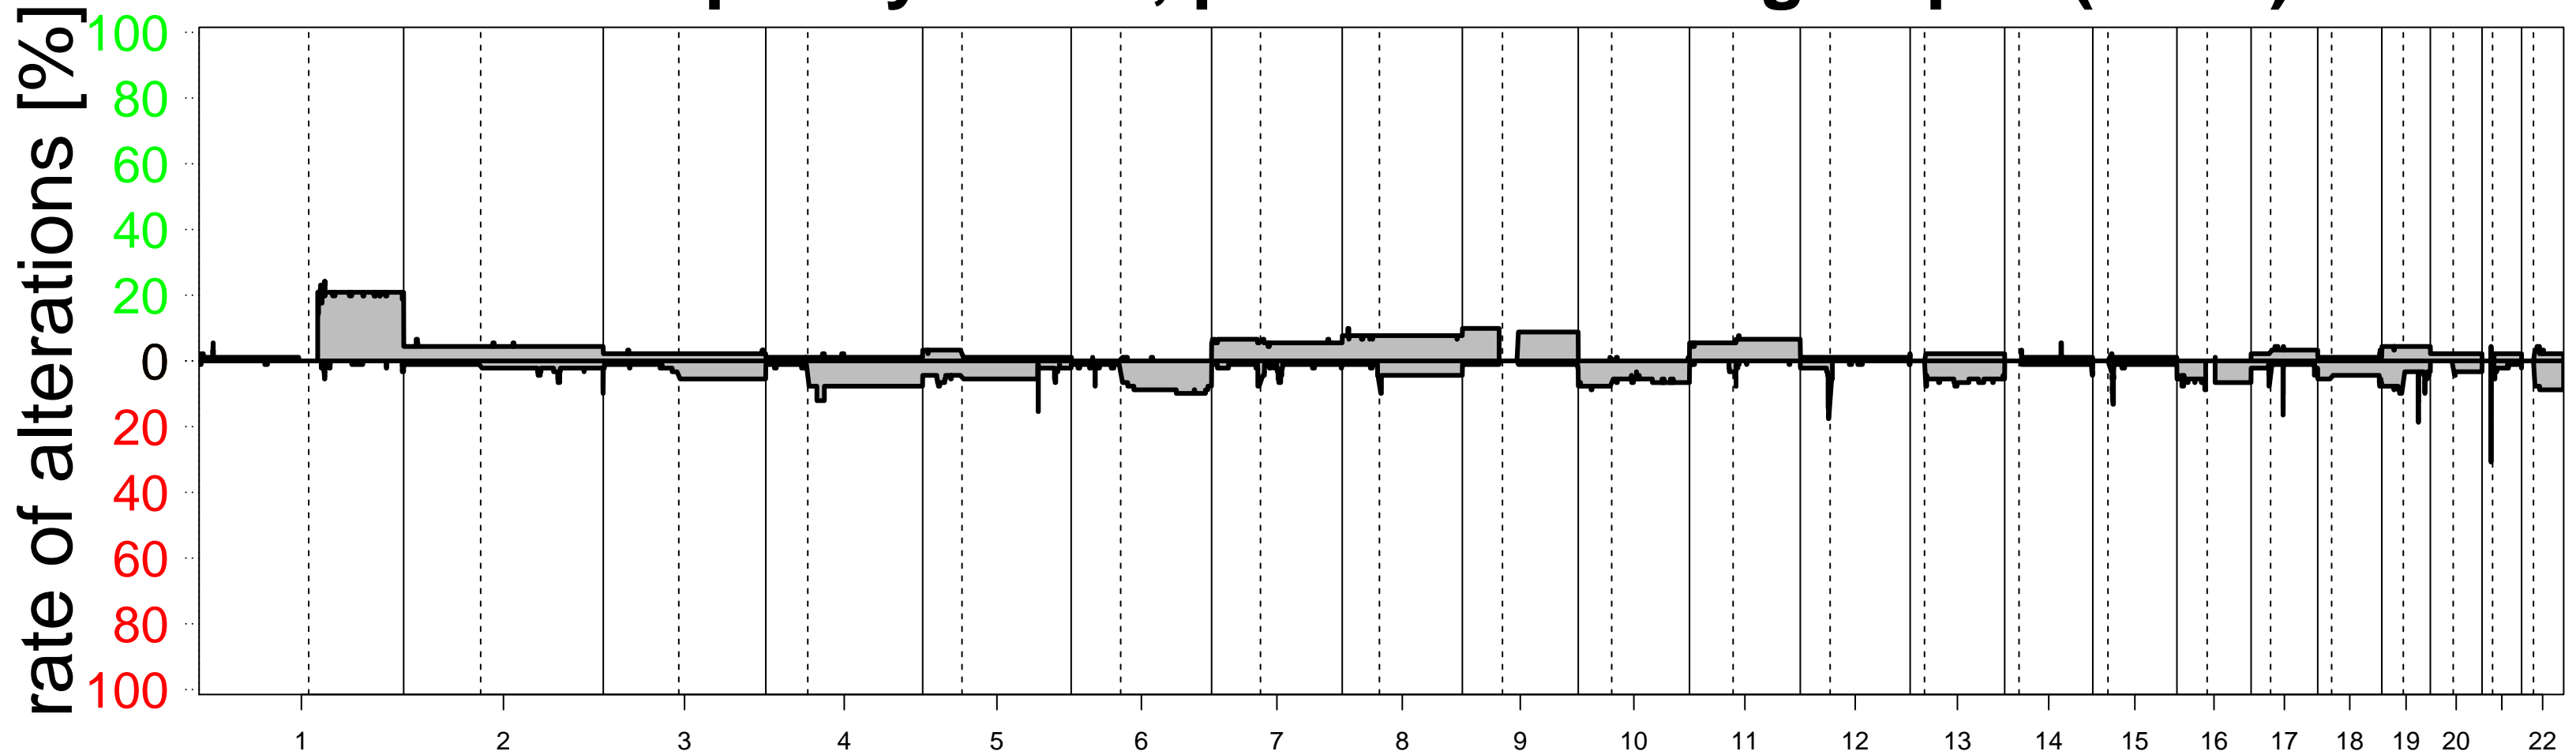

# m. c. ependymoma, posterior fossa group B (n=51)

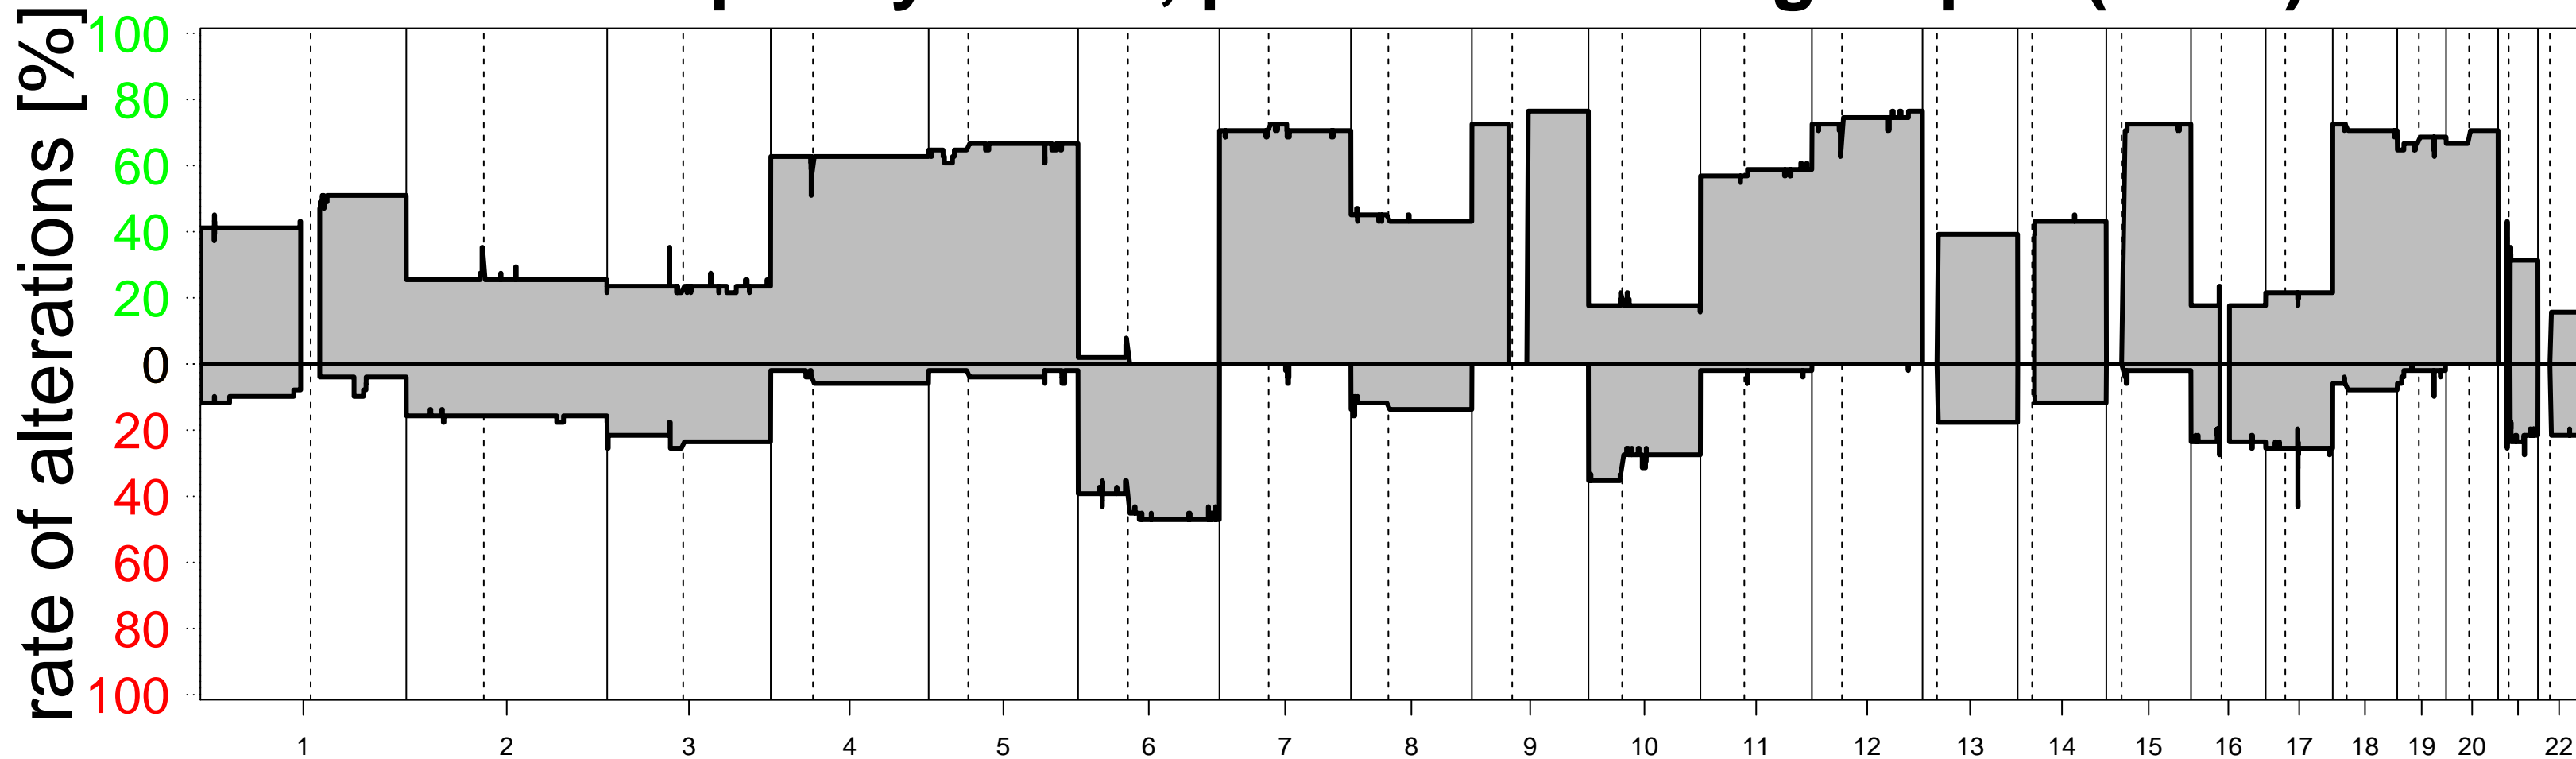

# m. c. ependymoma, RELA fusion (n=70)

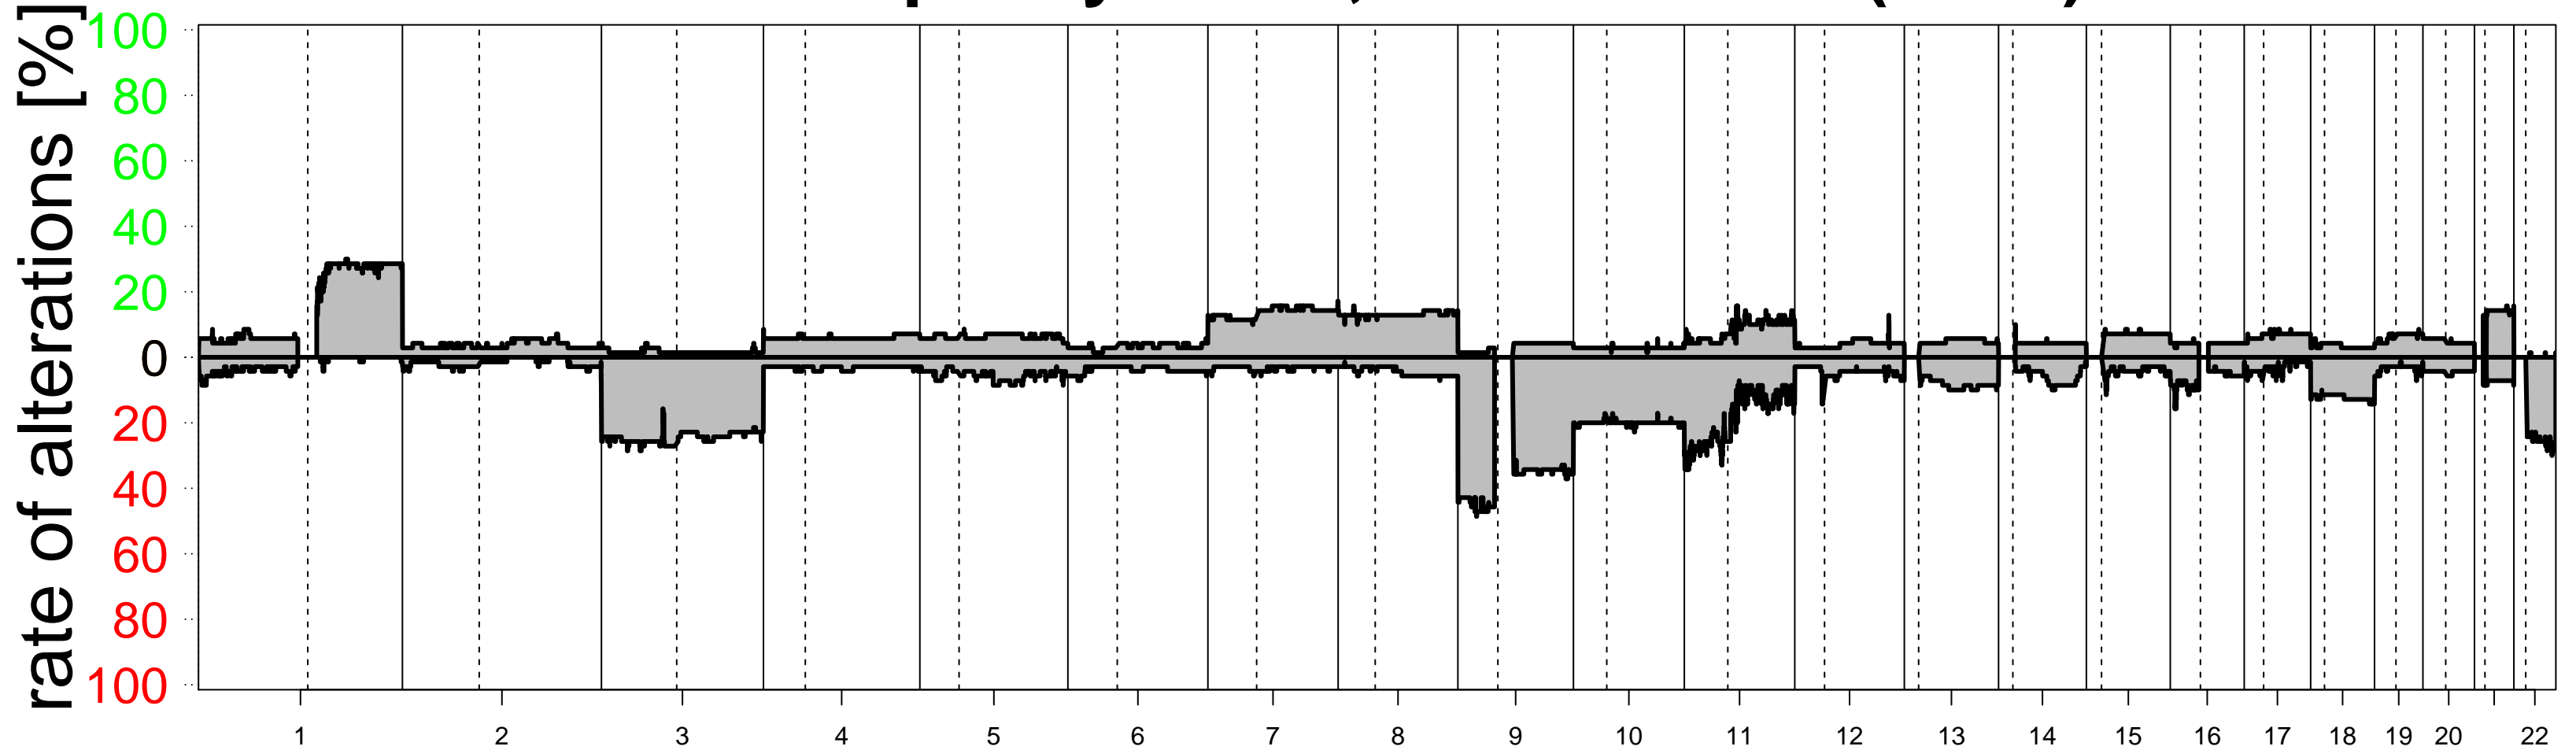

# m. c. ependymoma, spinal (n=27)

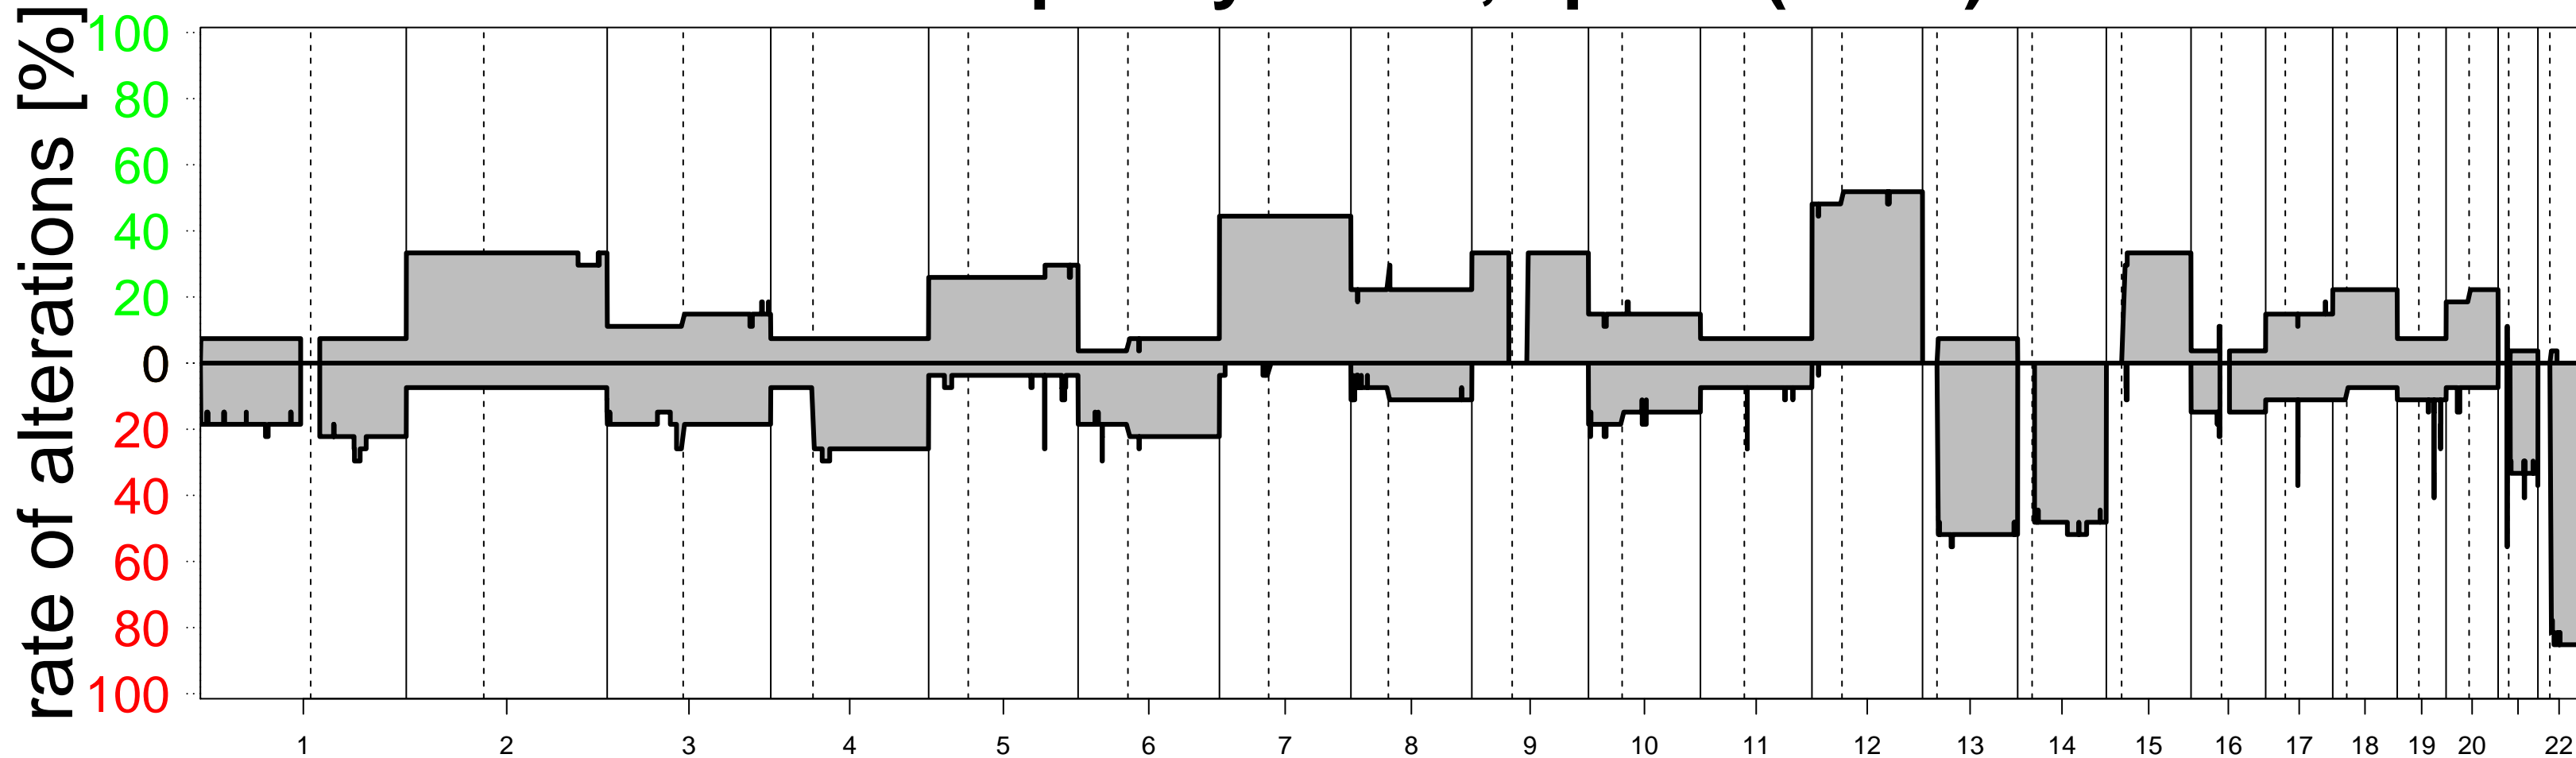

# m. c. ependymoma, YAP fusion (n=11)

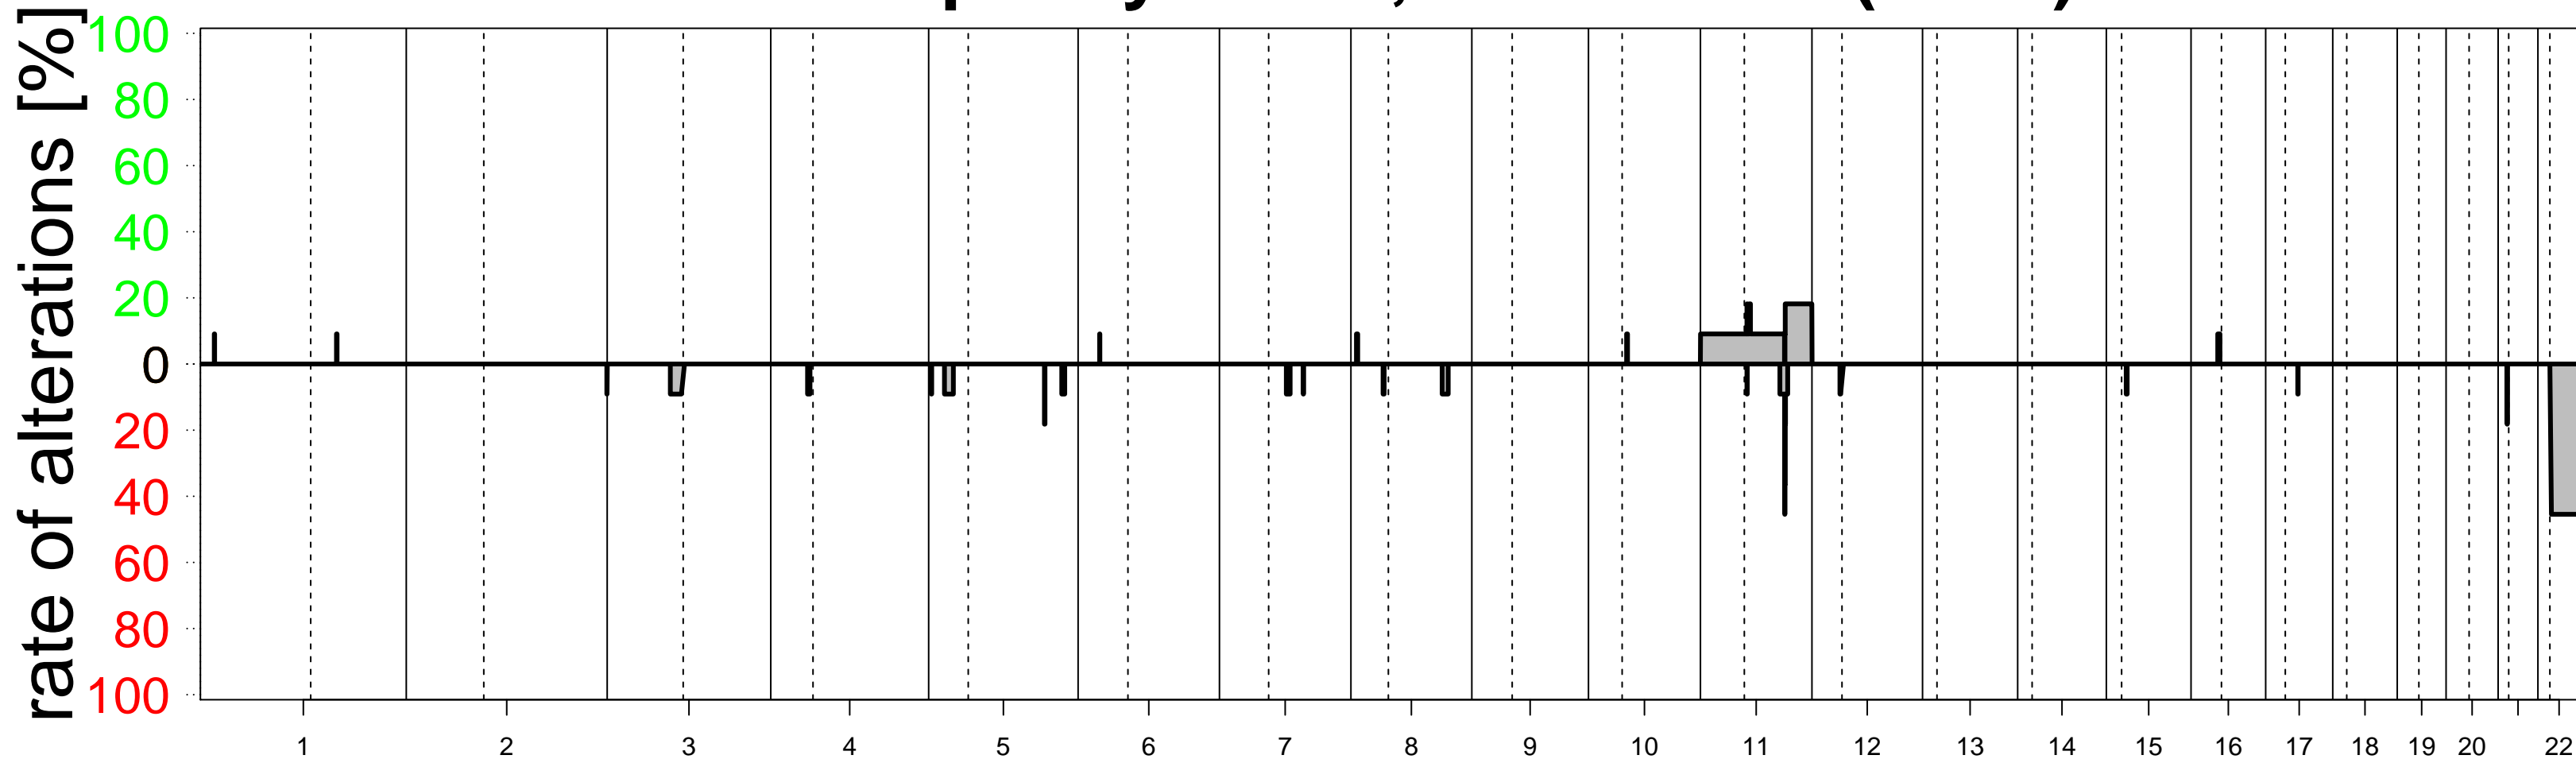



# m. c. esthesioneuroblastoma, subclass A (n=23)

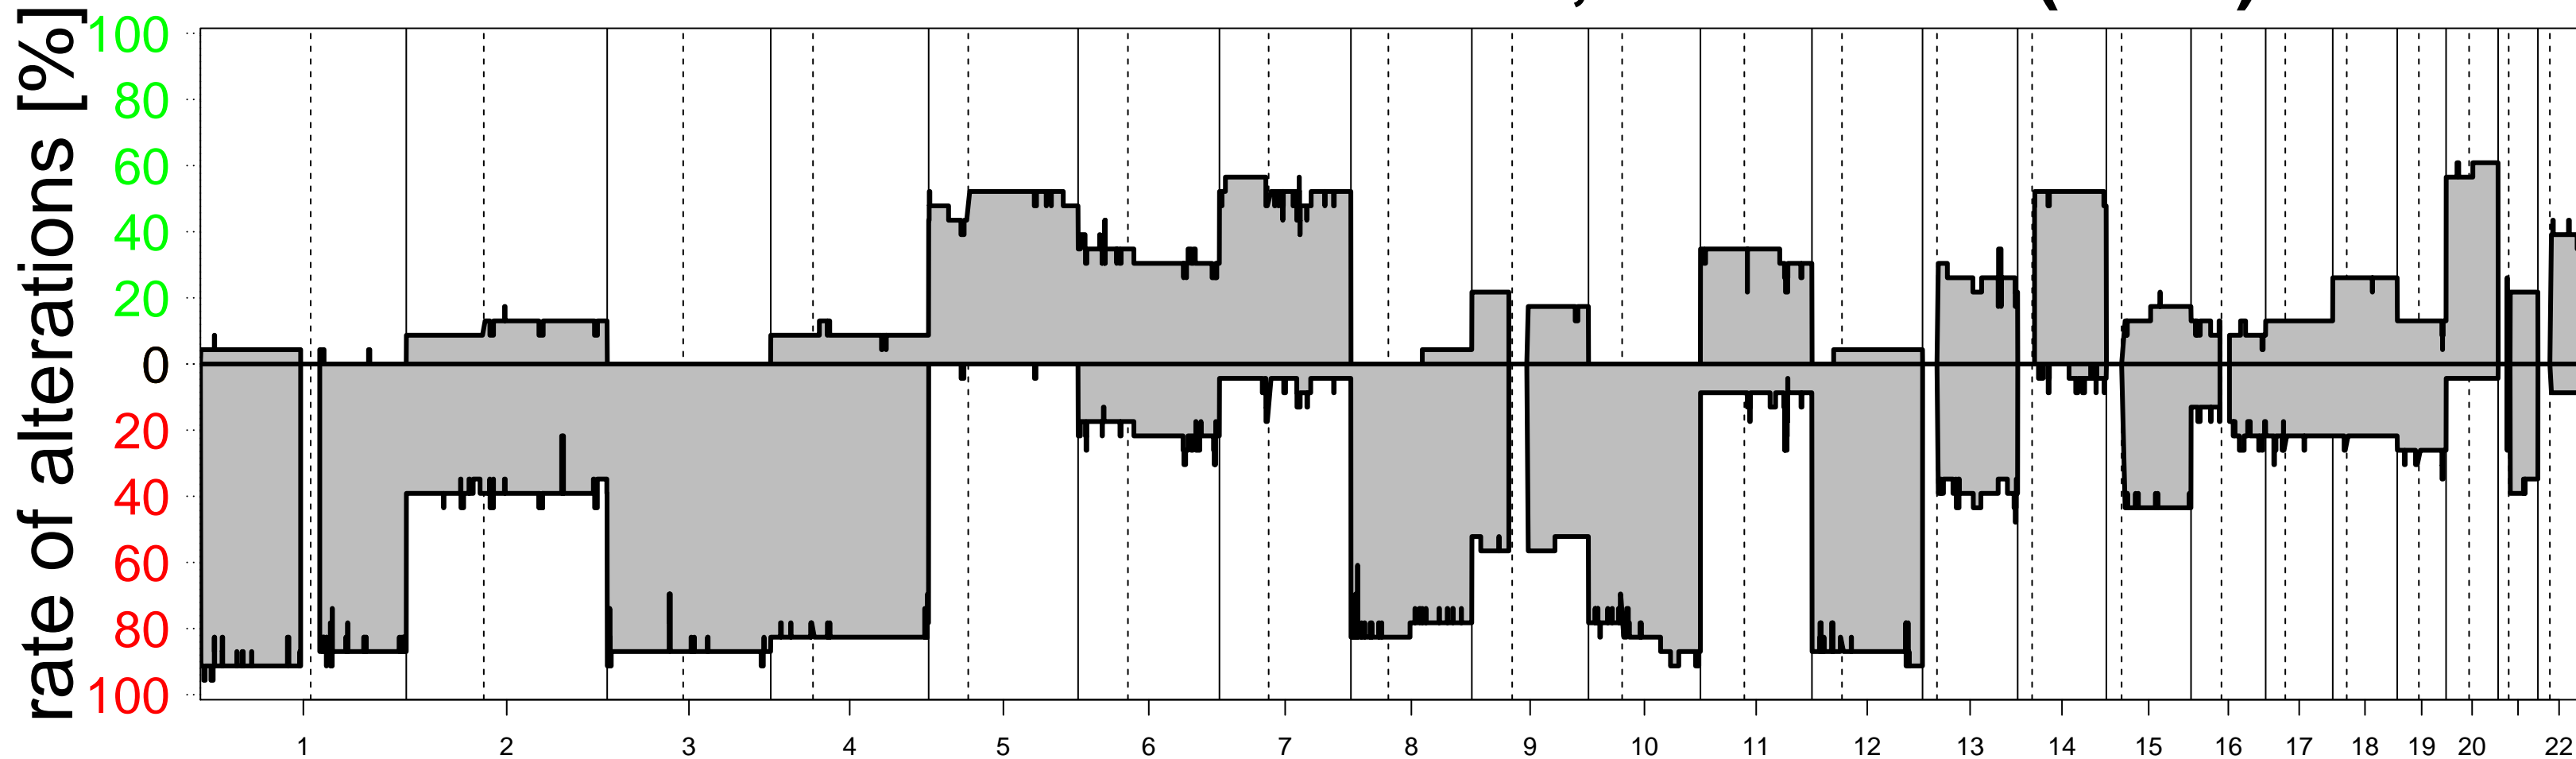

# m. c. esthesioneuroblastoma, subclass B (n=16)

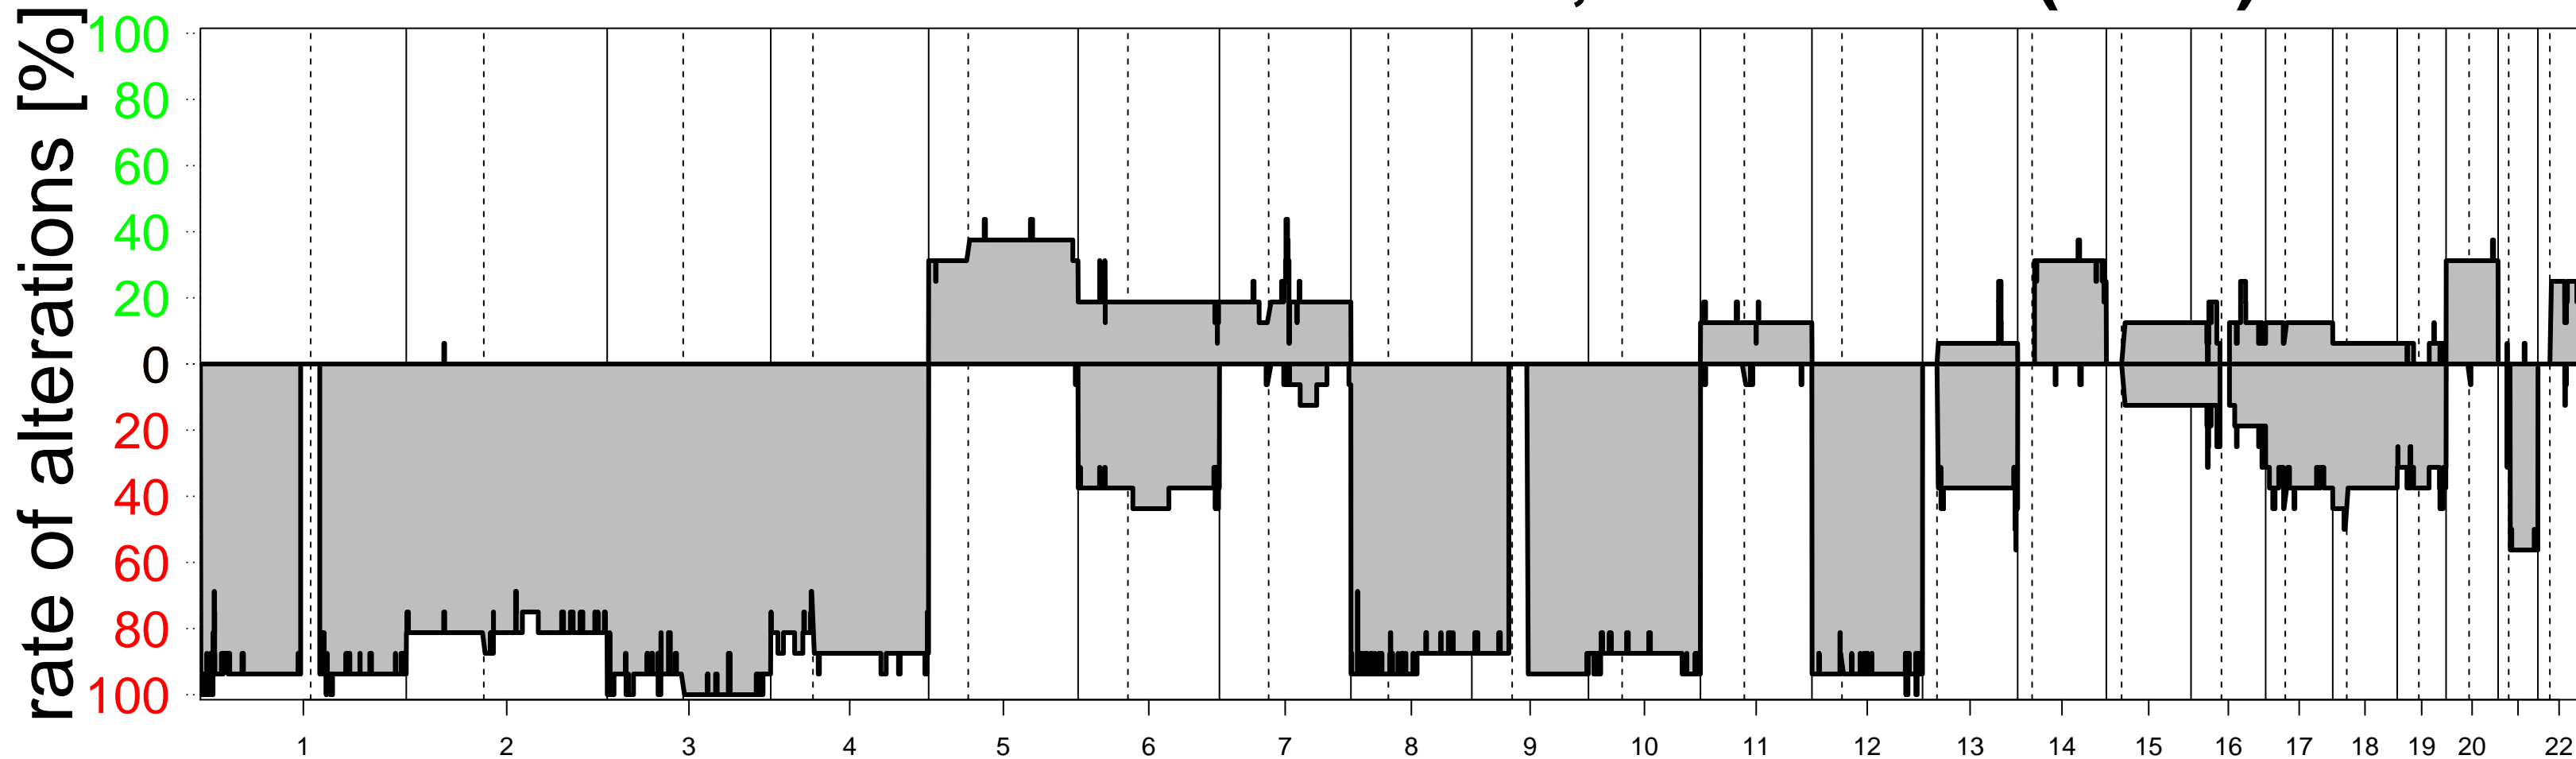

# m. c. Ewing sarcoma (n=14)

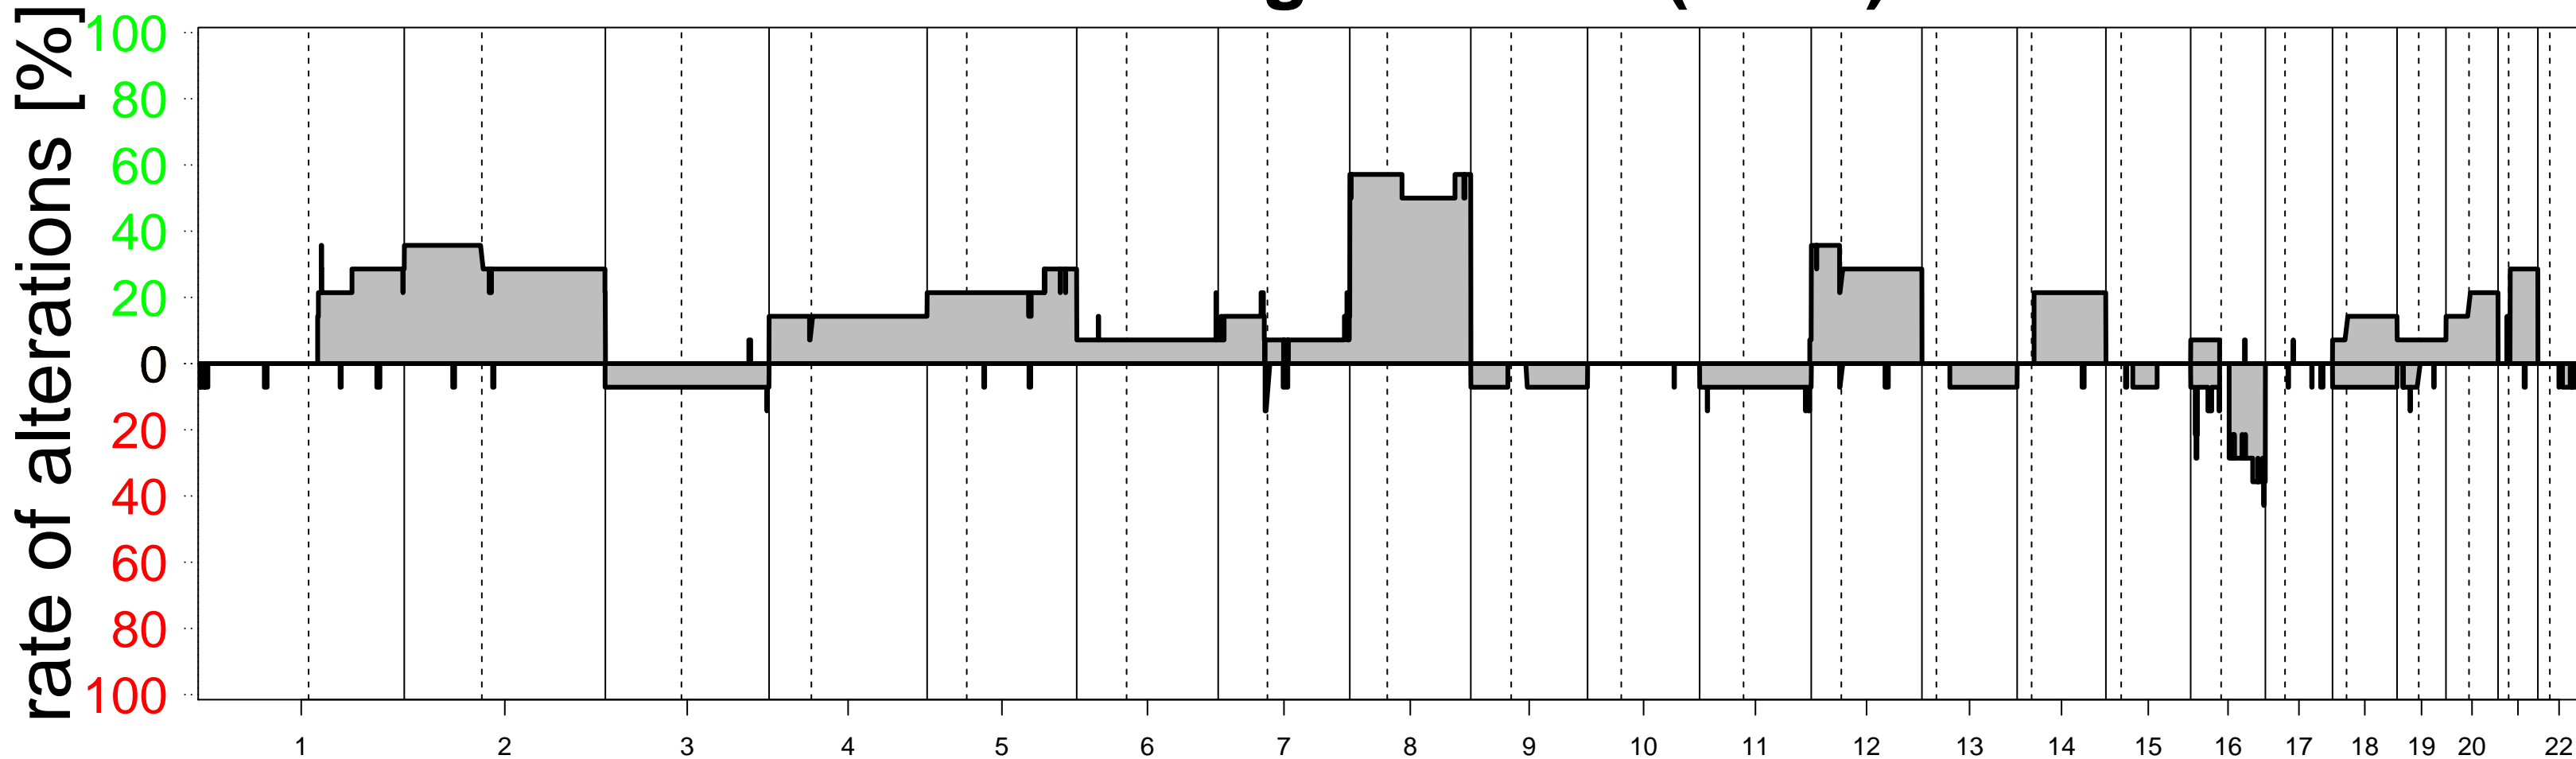

# m. c. glioblastoma, IDH wildtype, H3.3 G34 mutant (n=41)

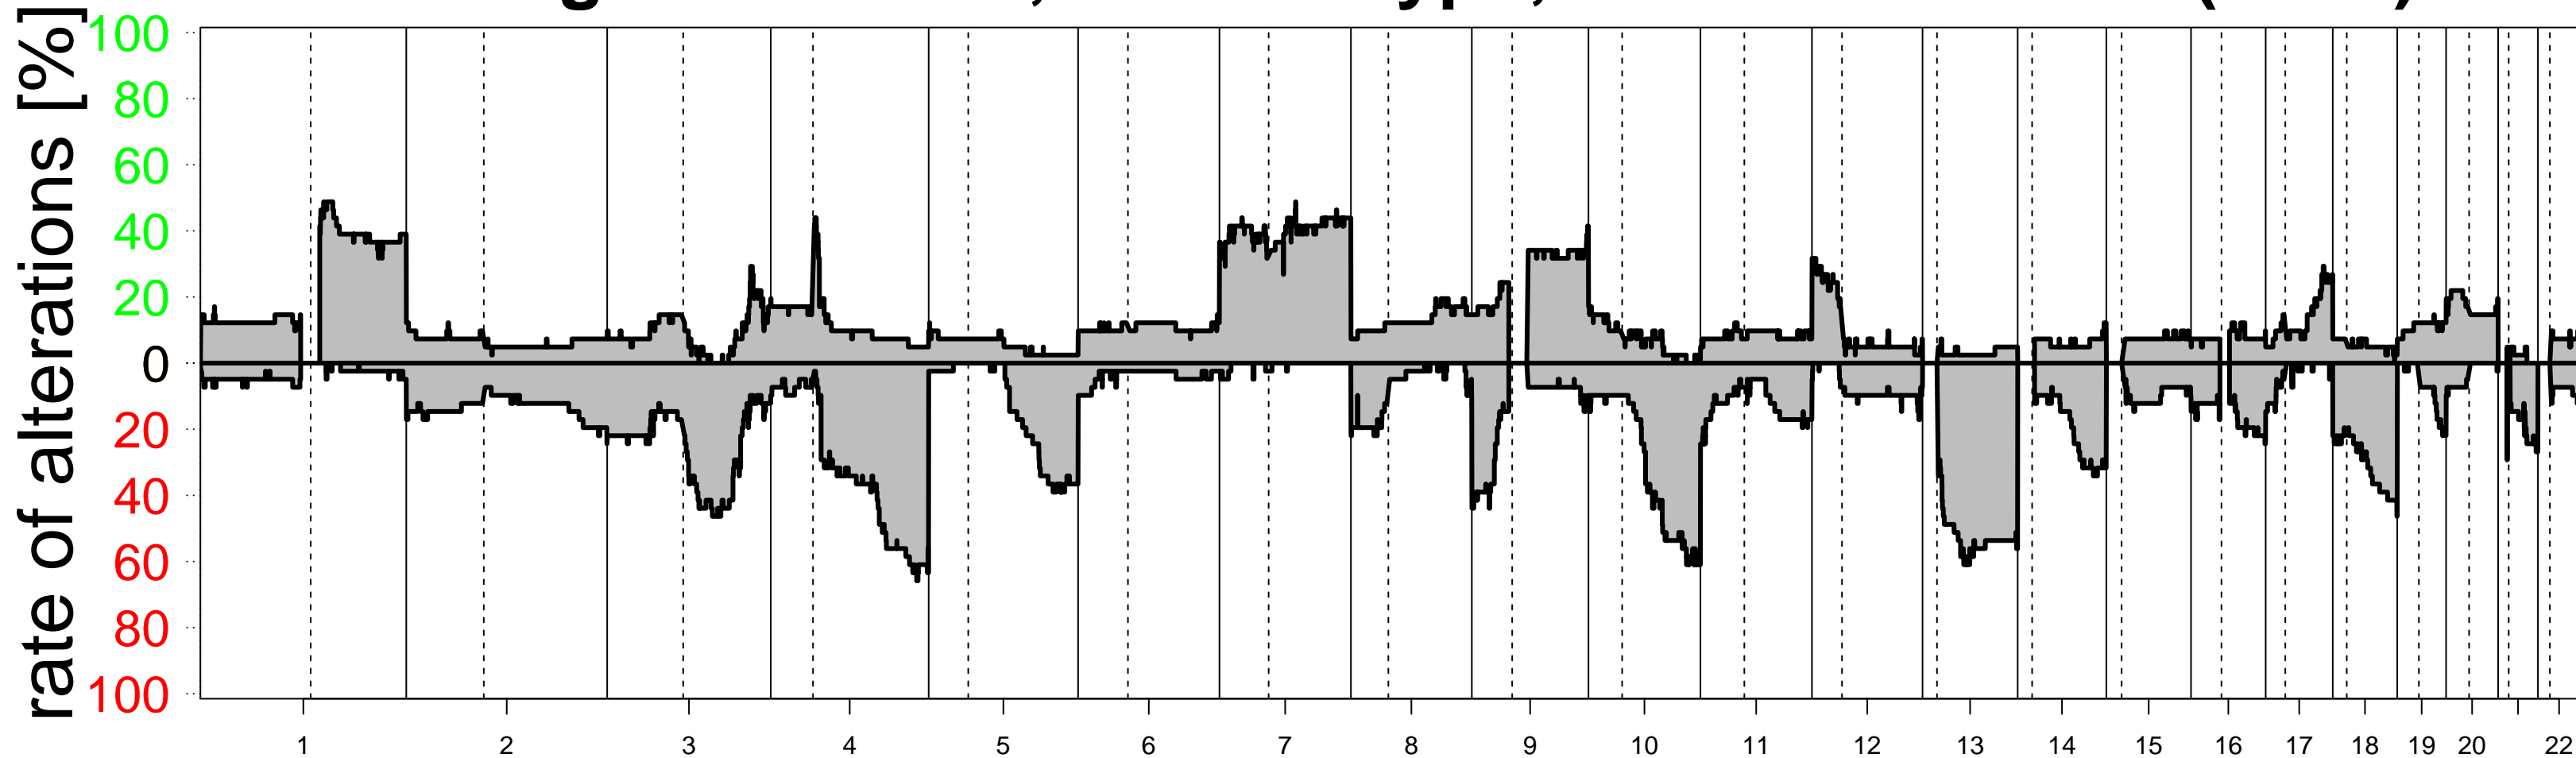

# m. c. glioblastoma, IDH wildtype, subclass mesenchymal (n=56)

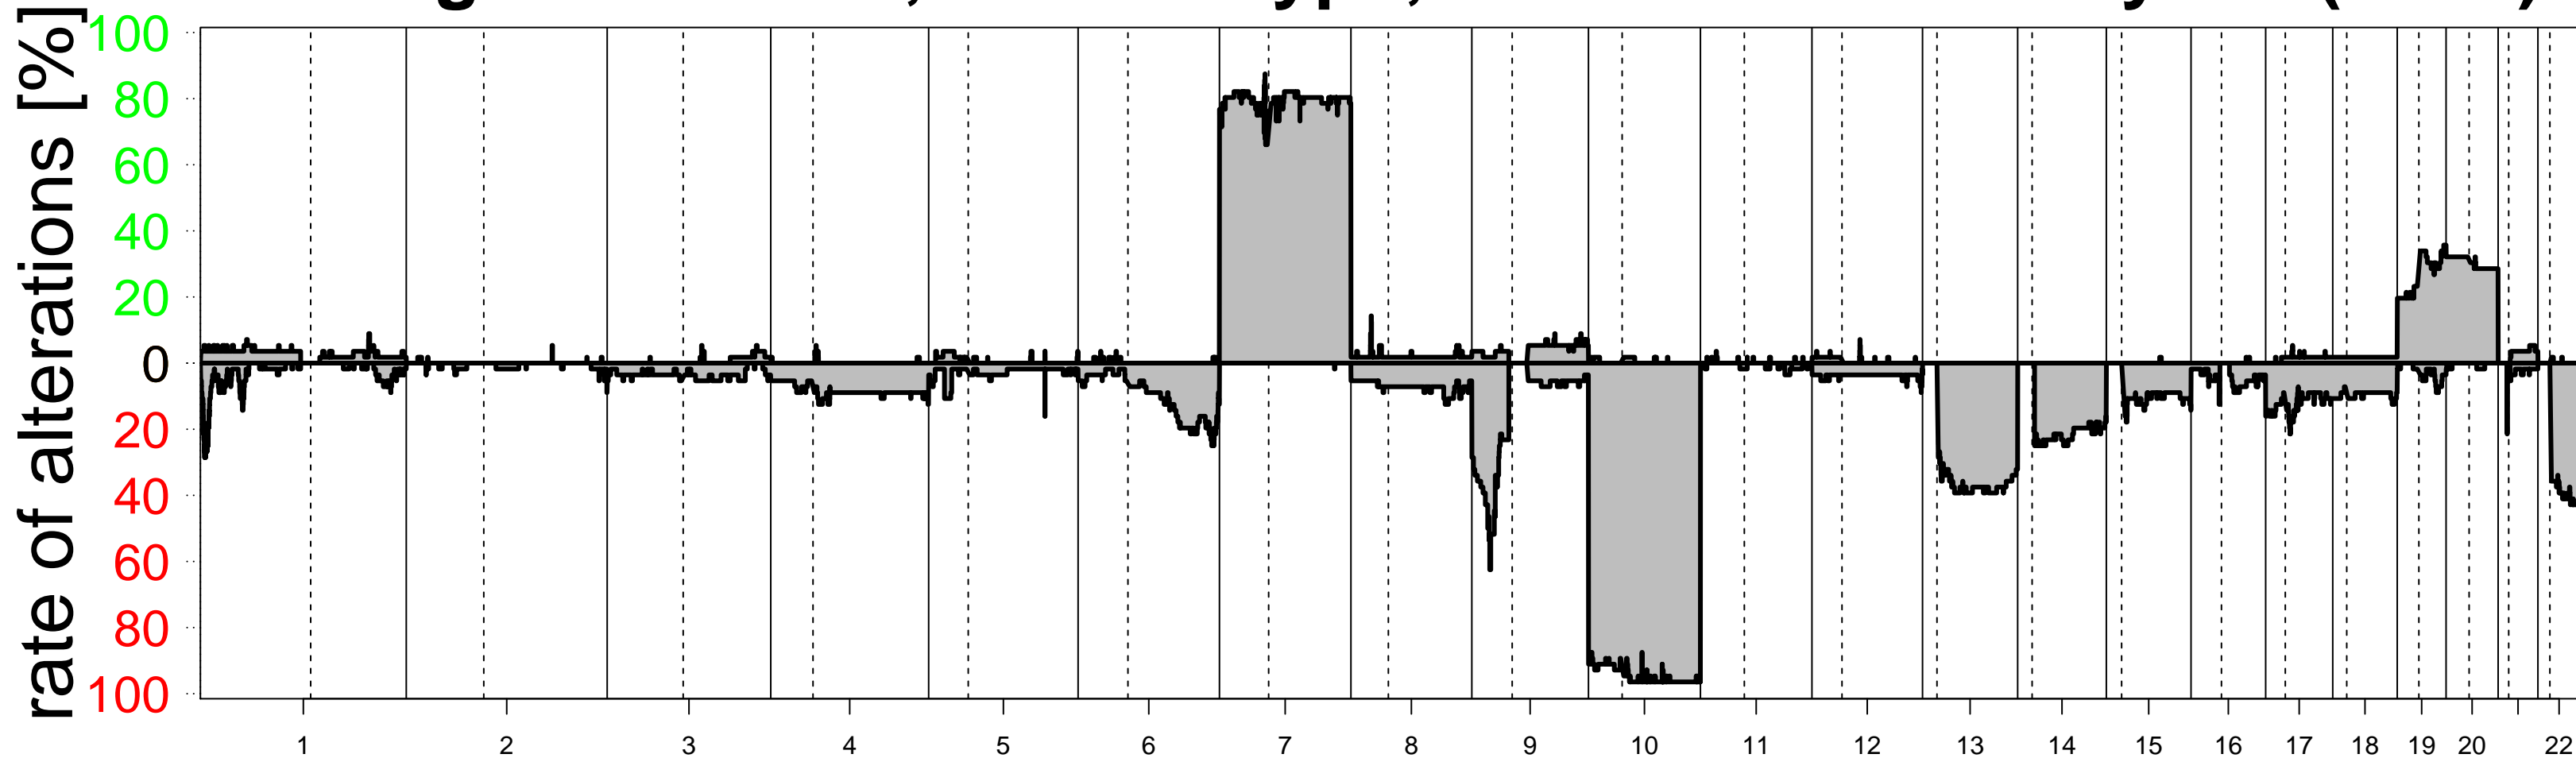

# m. c. glioblastoma, IDH wildtype, subclass midline (n=14)

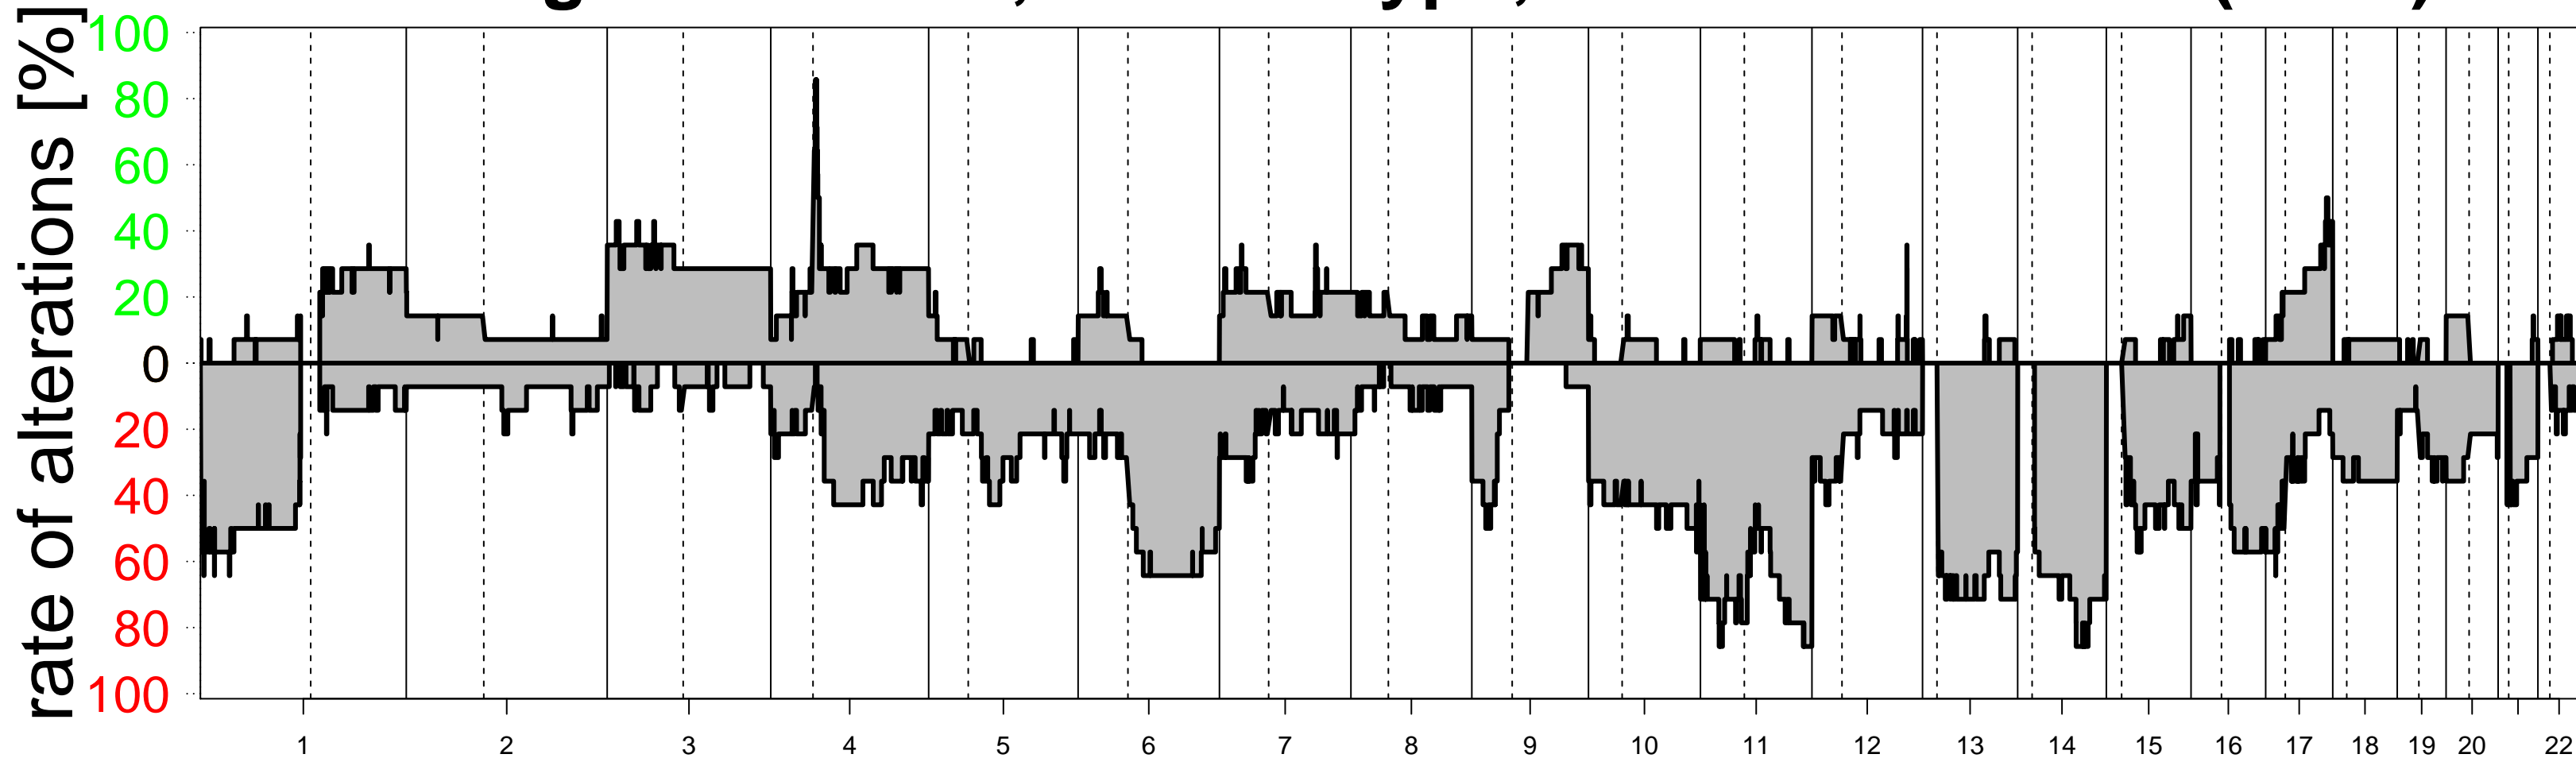

# m. c. glioblastoma, IDH wildtype, subclass MYCN (n=16)

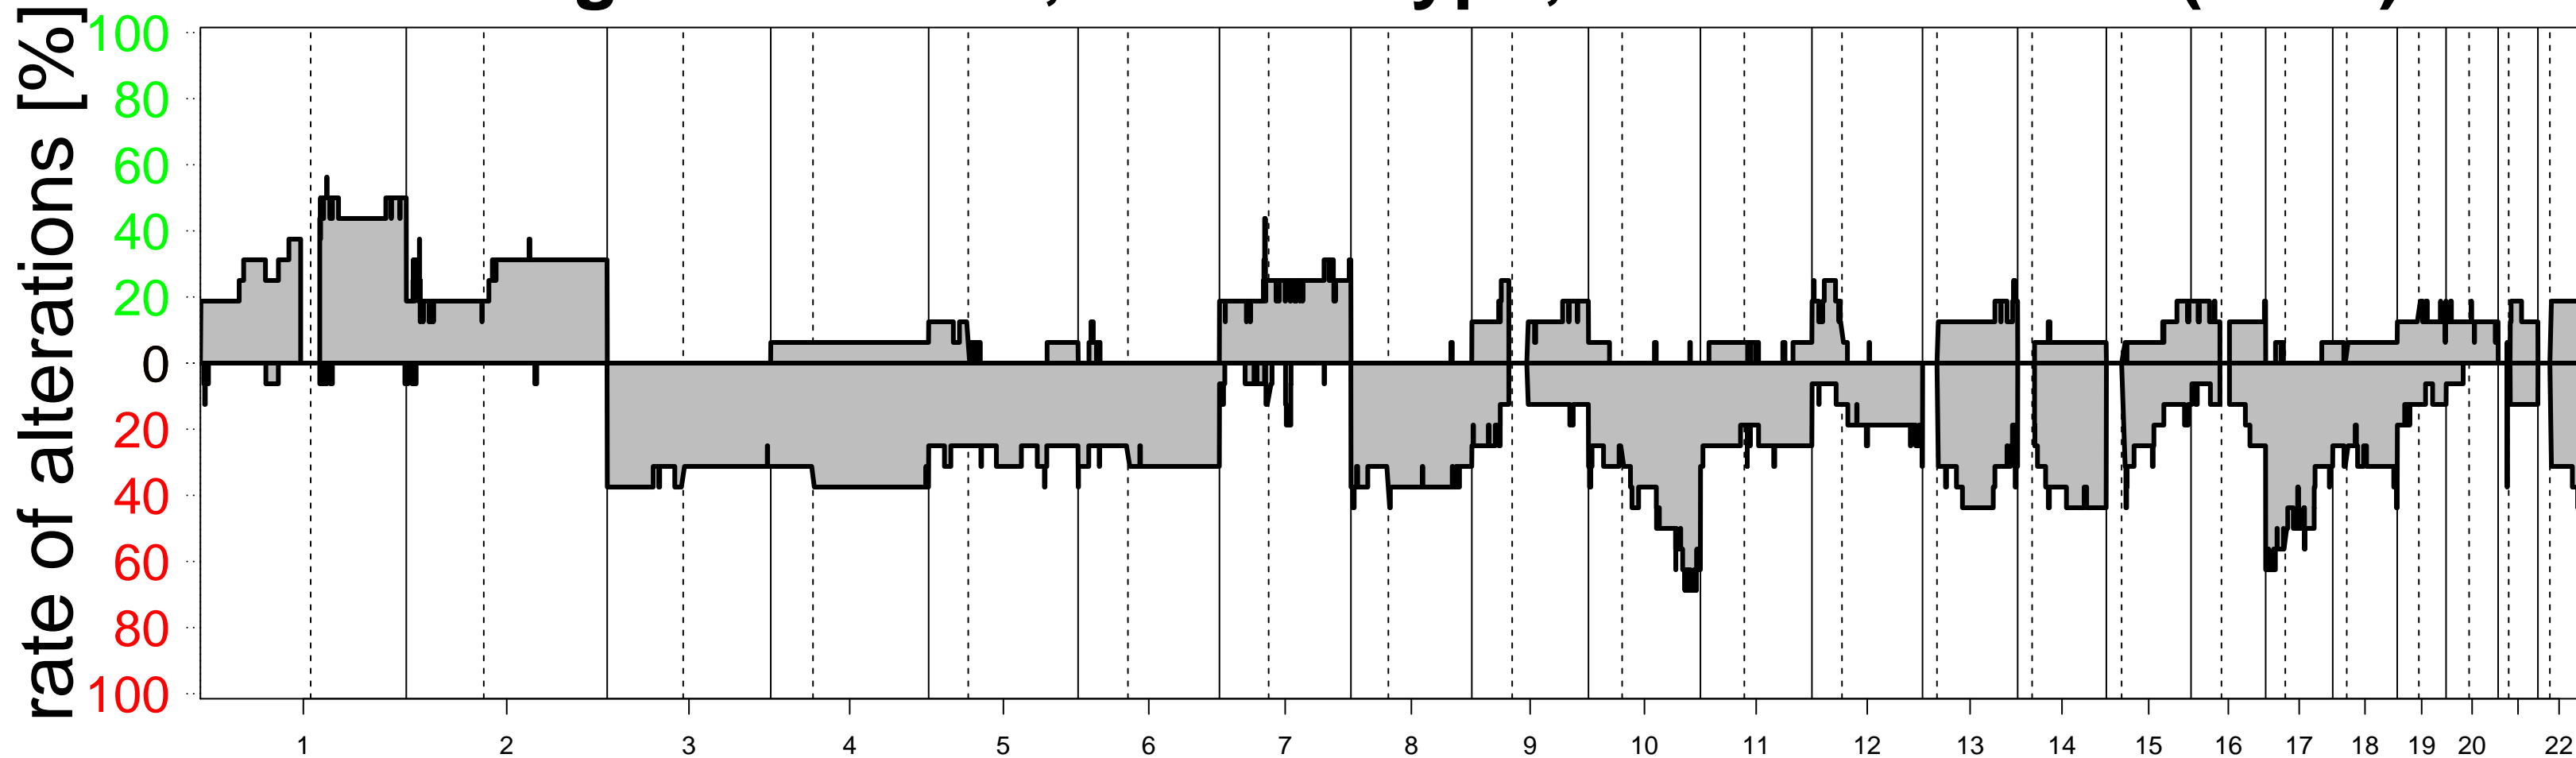

# m. c. glioblastoma, IDH wildtype, subclass RTK I (n=64)

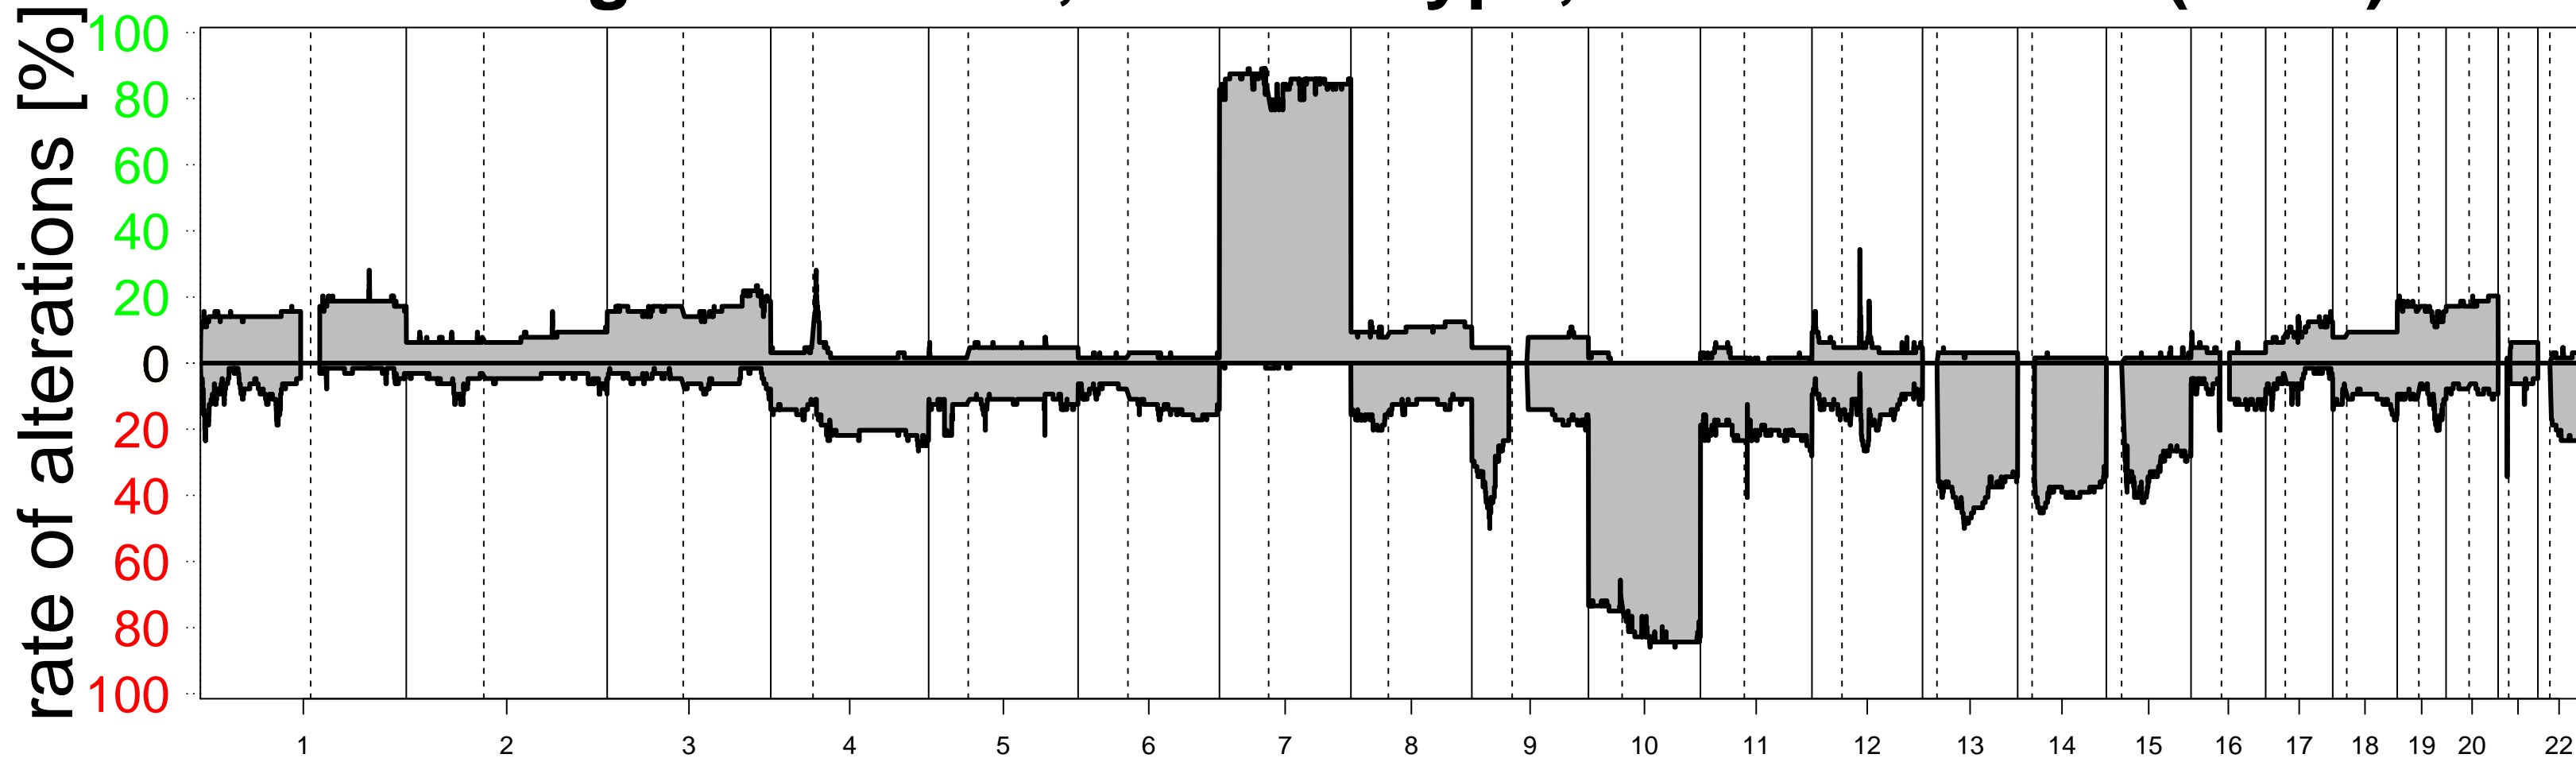



# m. c. glioblastoma, IDH wildtype, subclass RTK II (n=143)

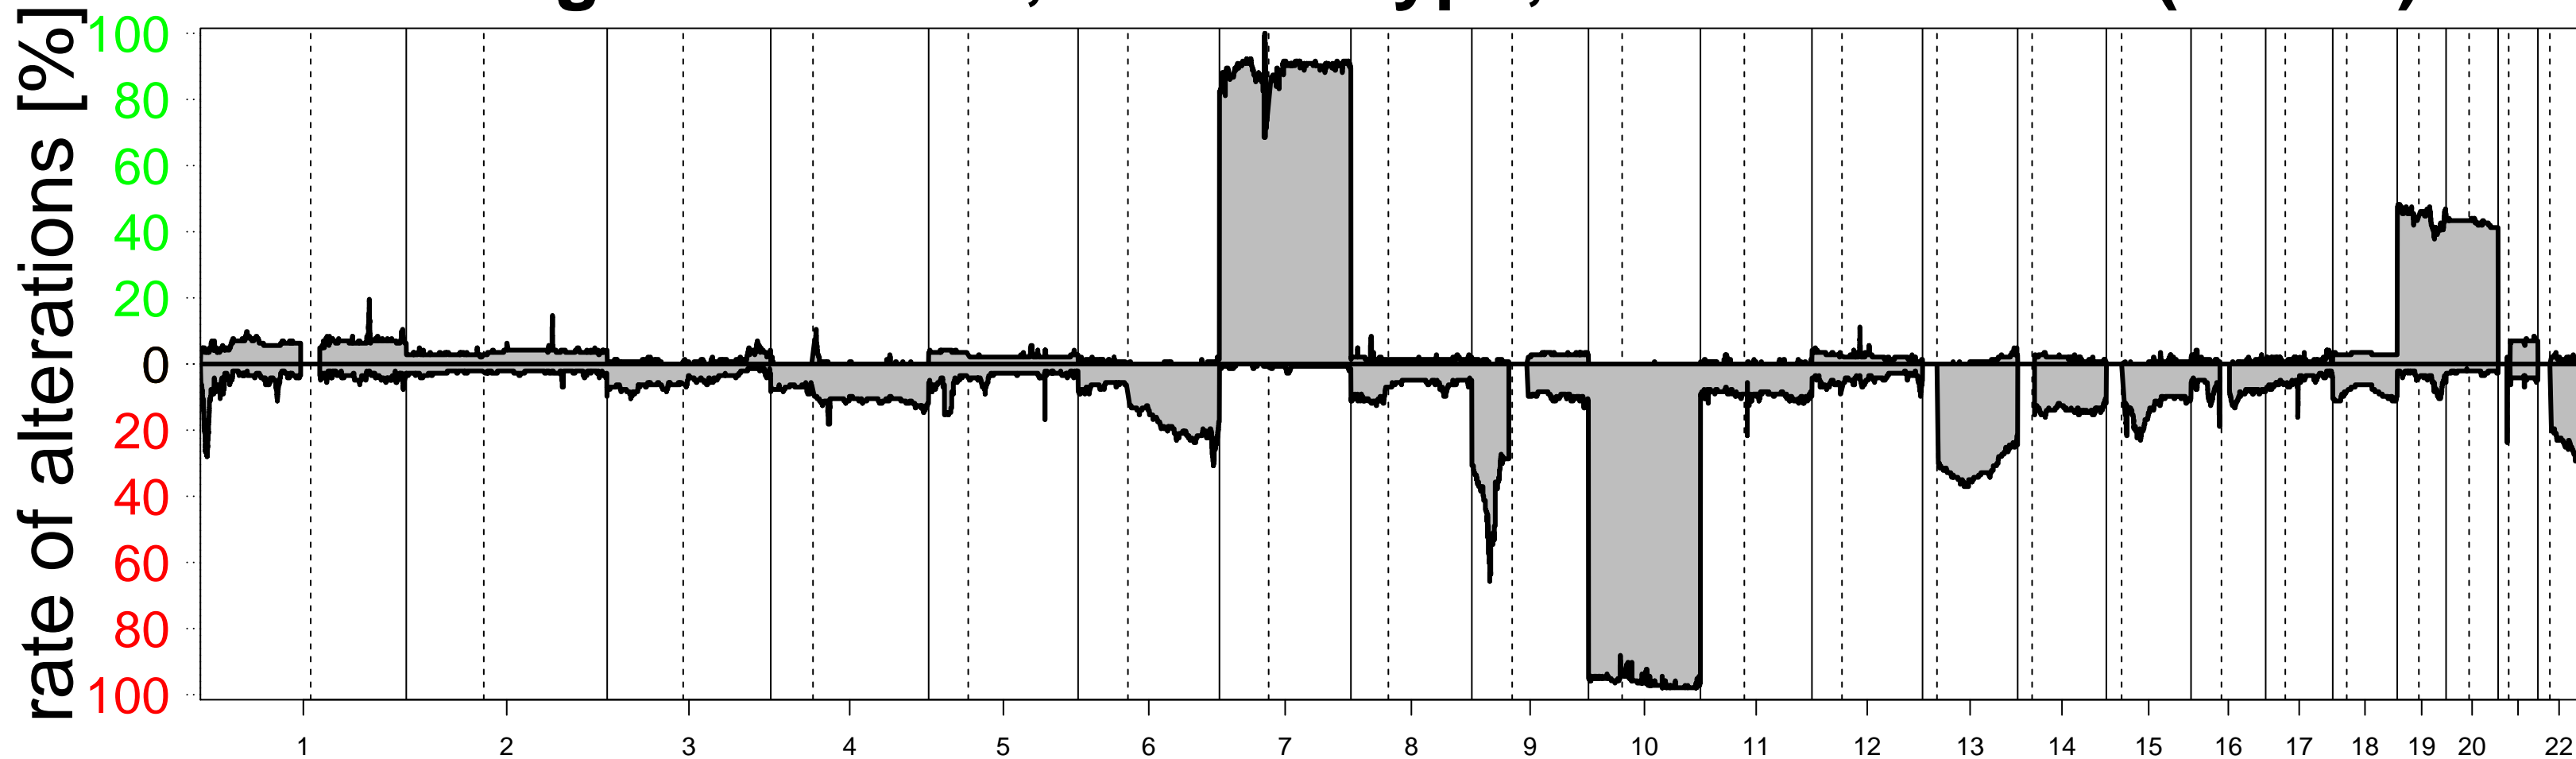

# m. c. glioblastoma, IDH wildtype, subclass RTK III (n=13)

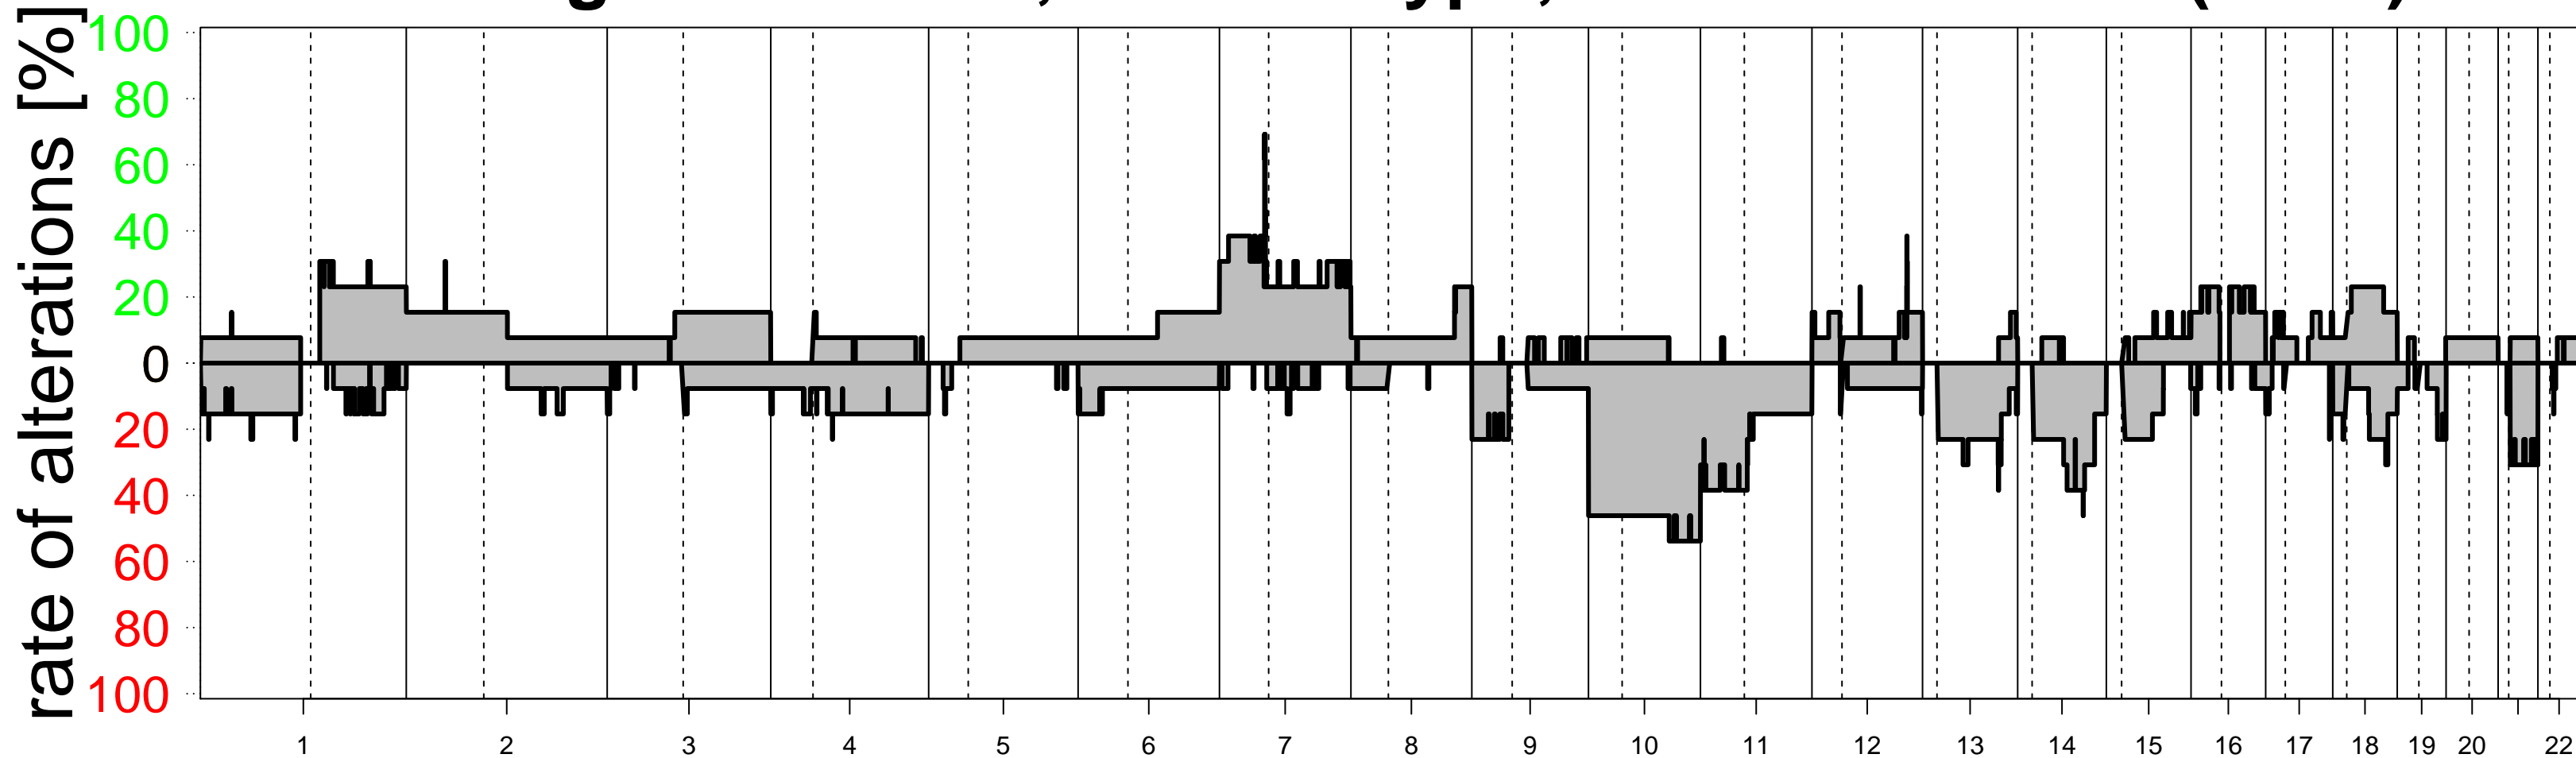

# m. c. hemangioblastoma (n=25)

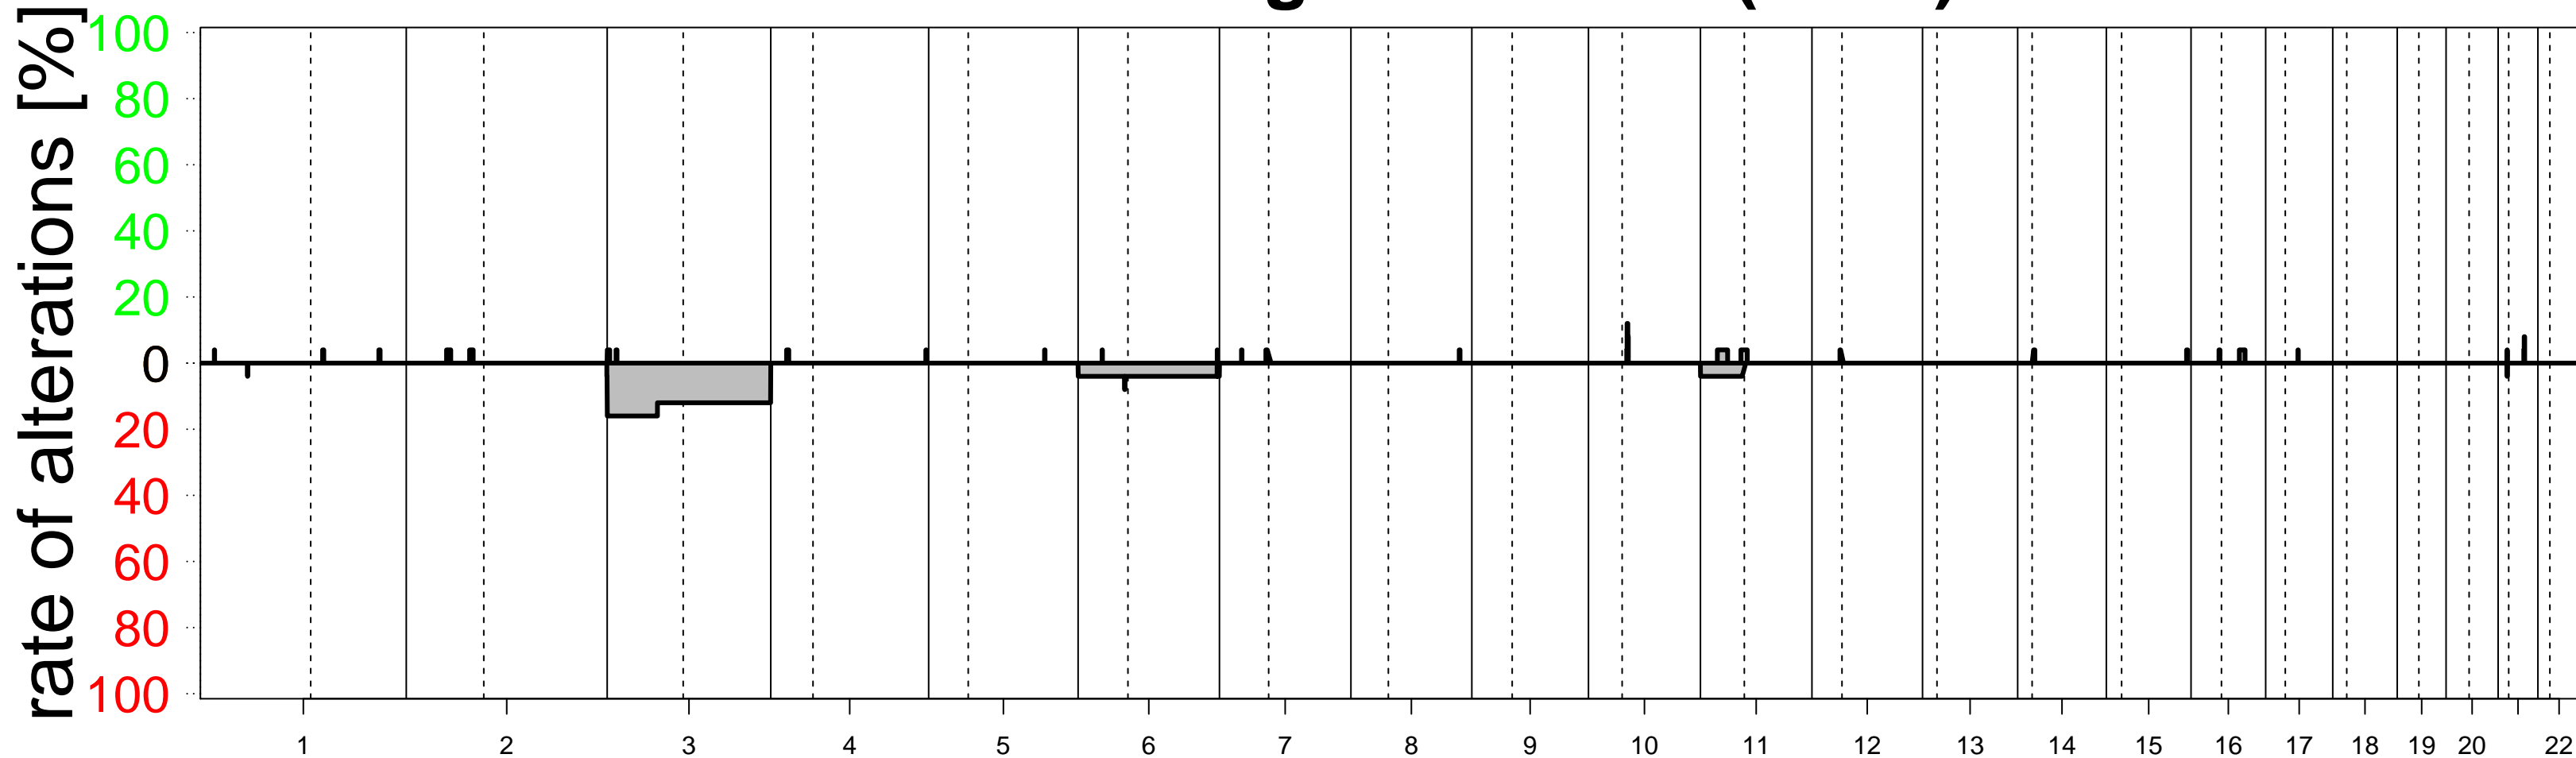

# m. c. IDH glioma, subclass 1p-19q codeleted oligodendroglioma (n=80)

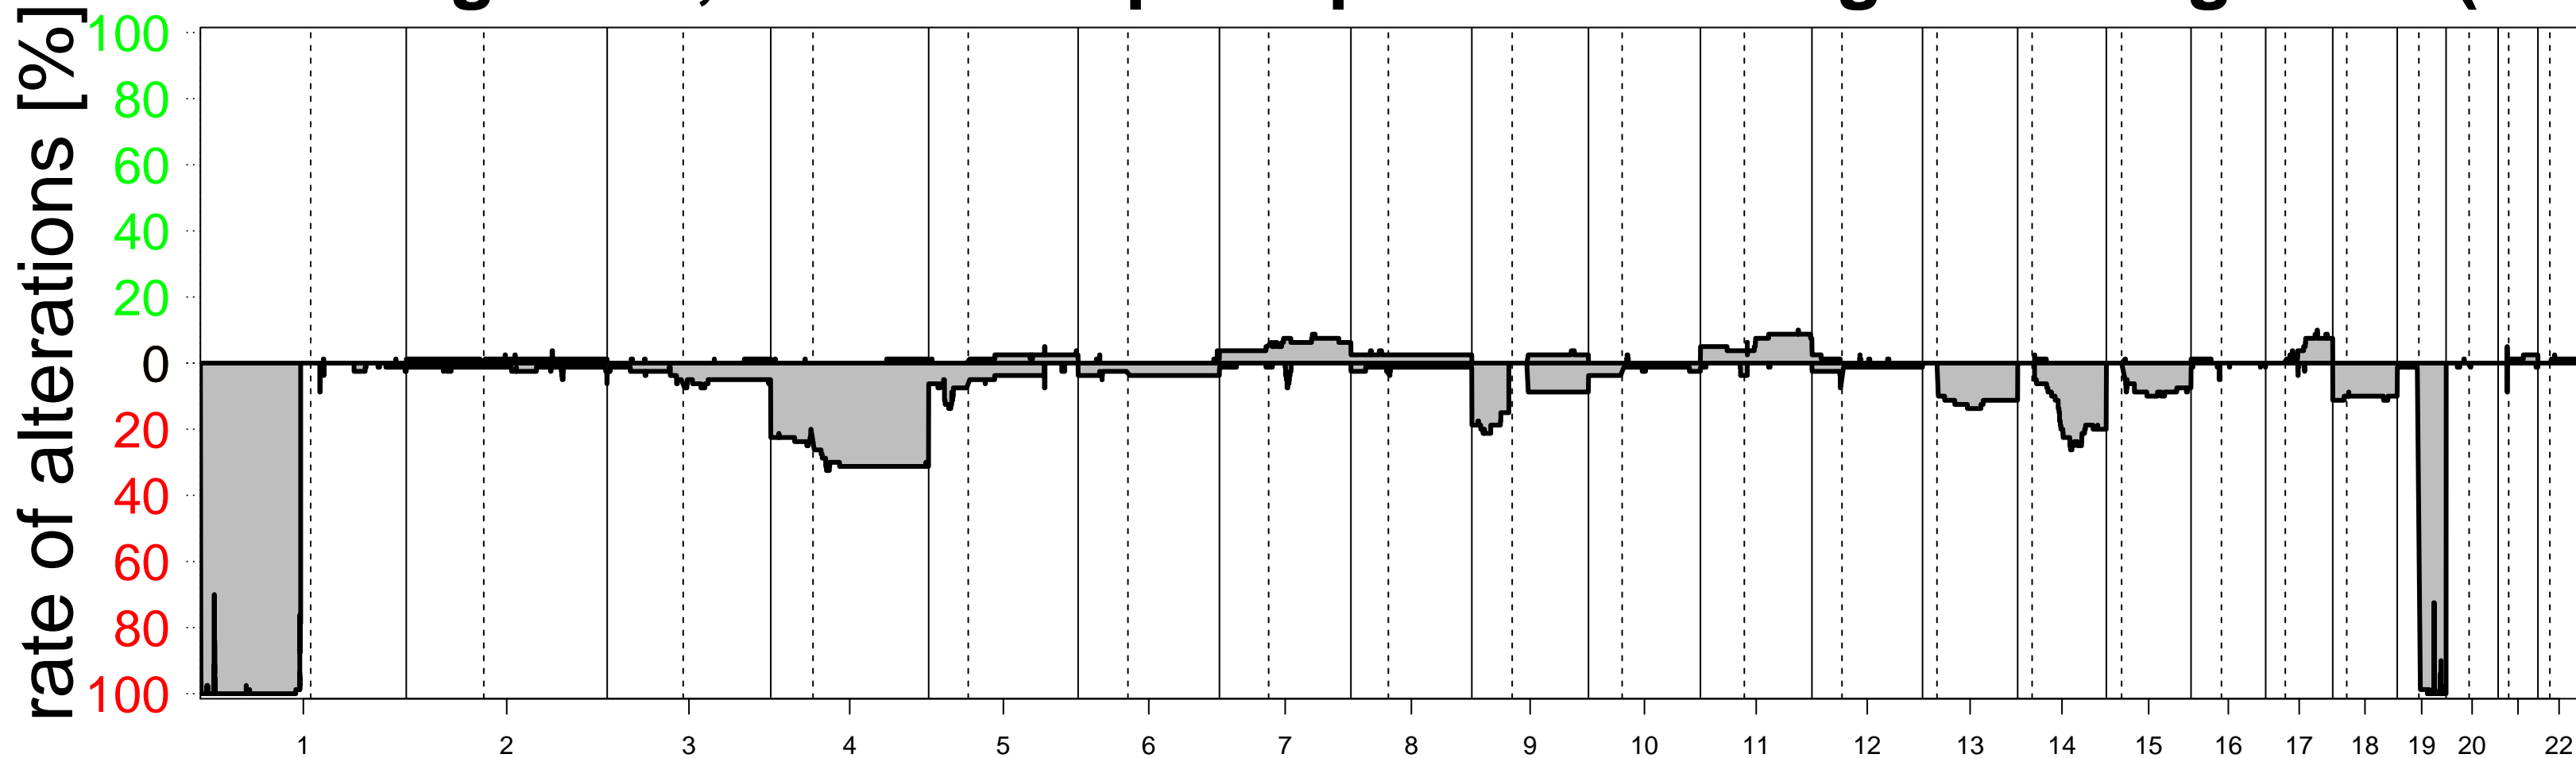

# m. c. IDH glioma, subclass astrocytoma (n=78)

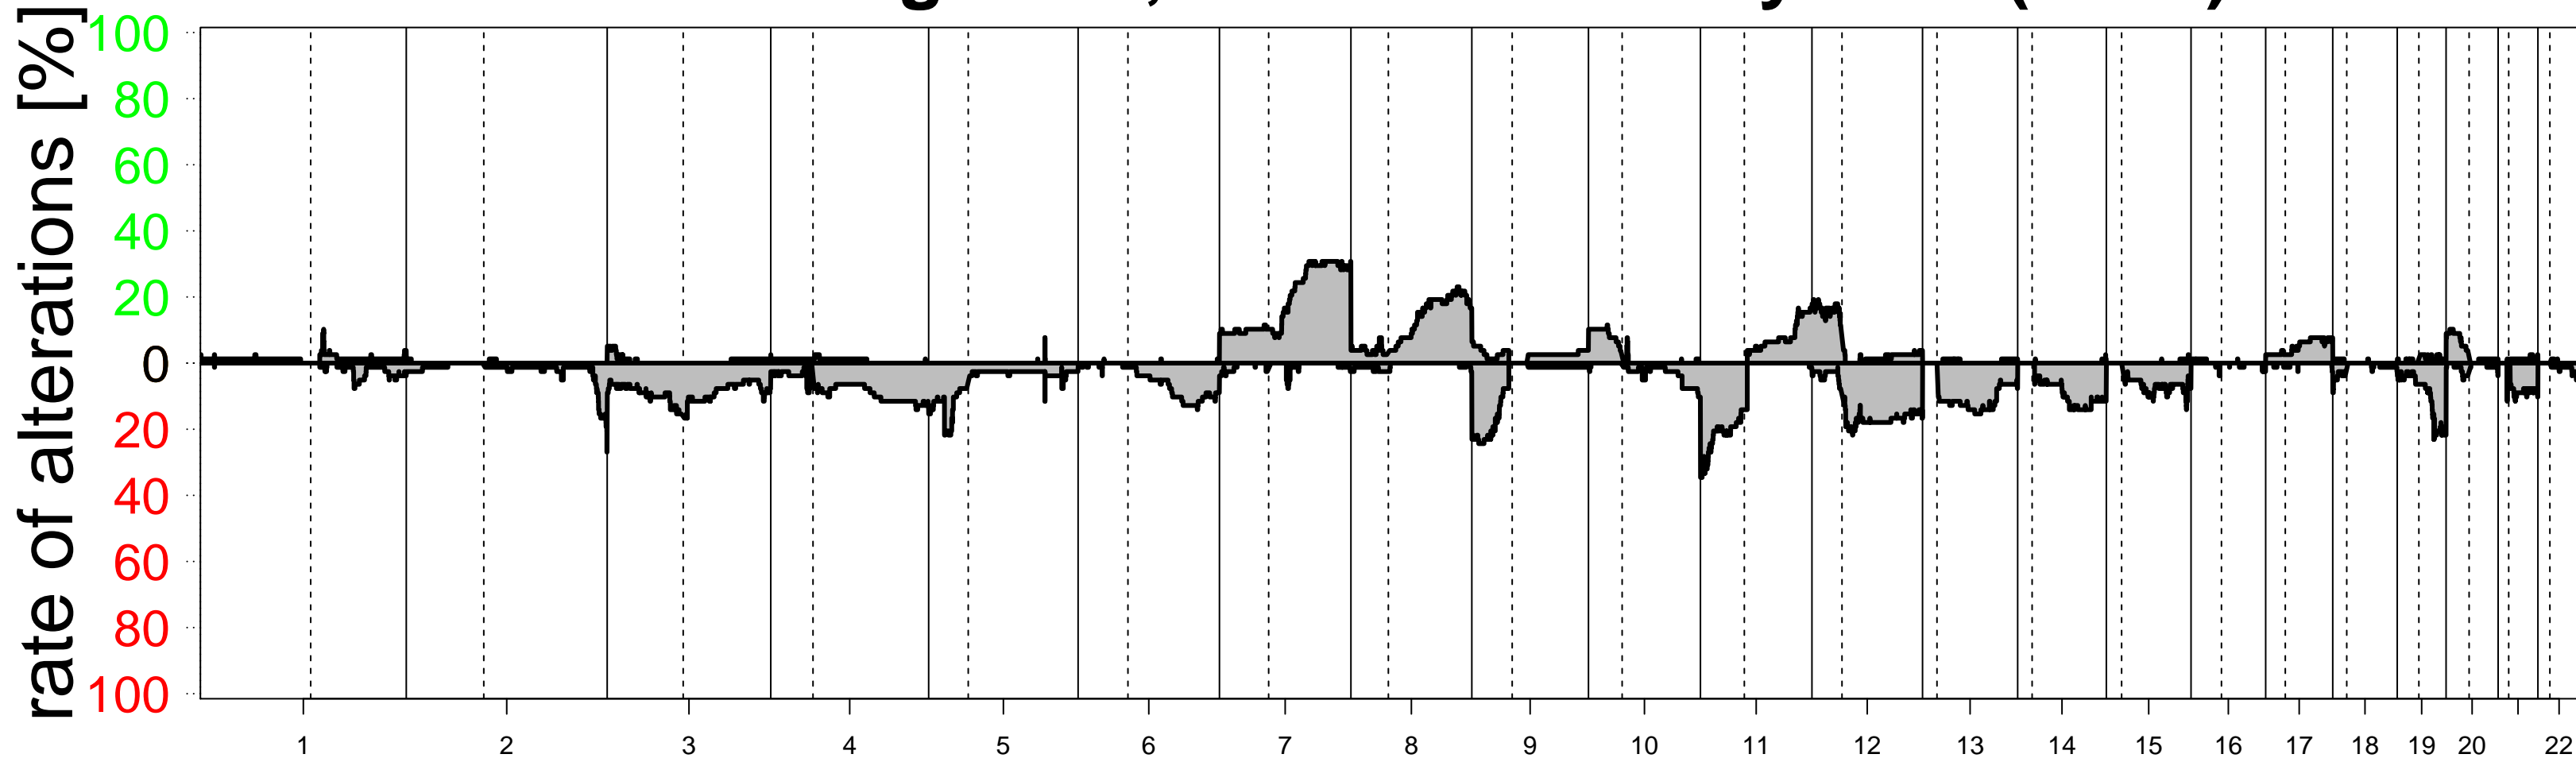

# m. c. IDH glioma, subclass high grade astrocytoma (n=46)

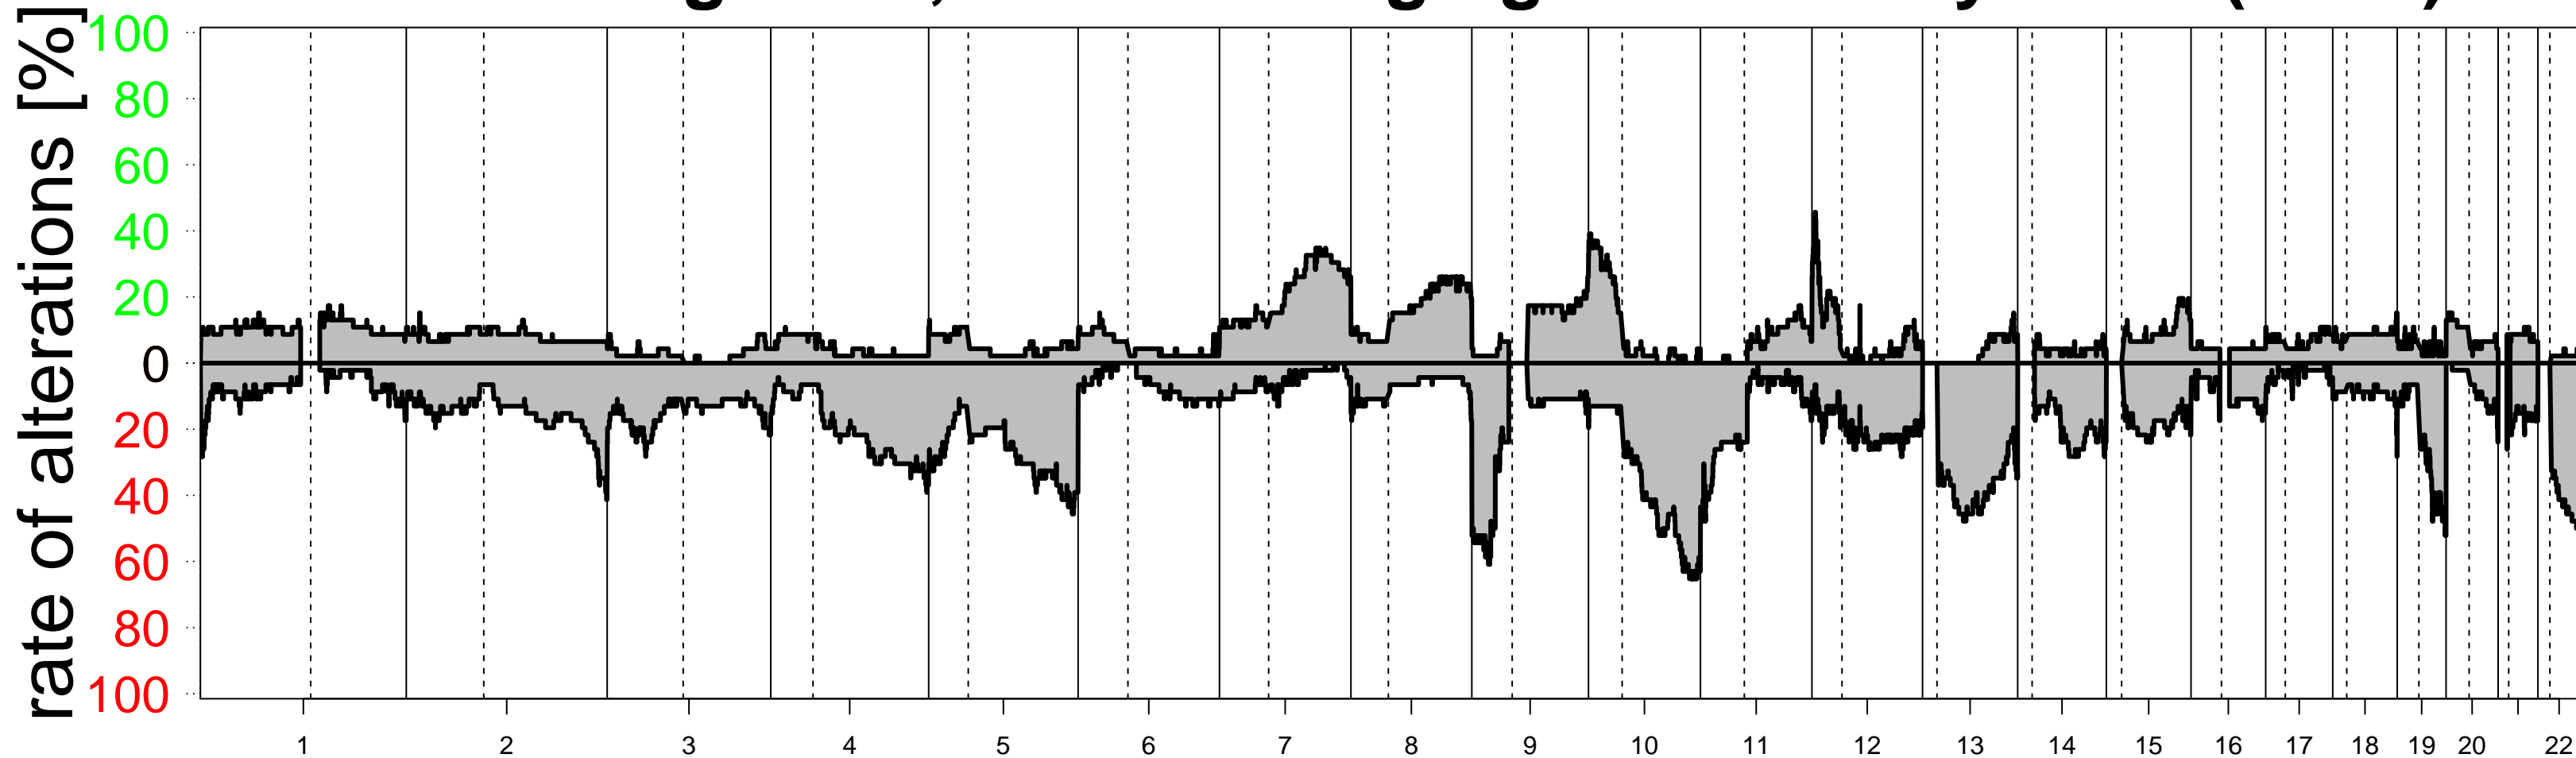

# m. c. infantile hemispheric glioma (n=10)

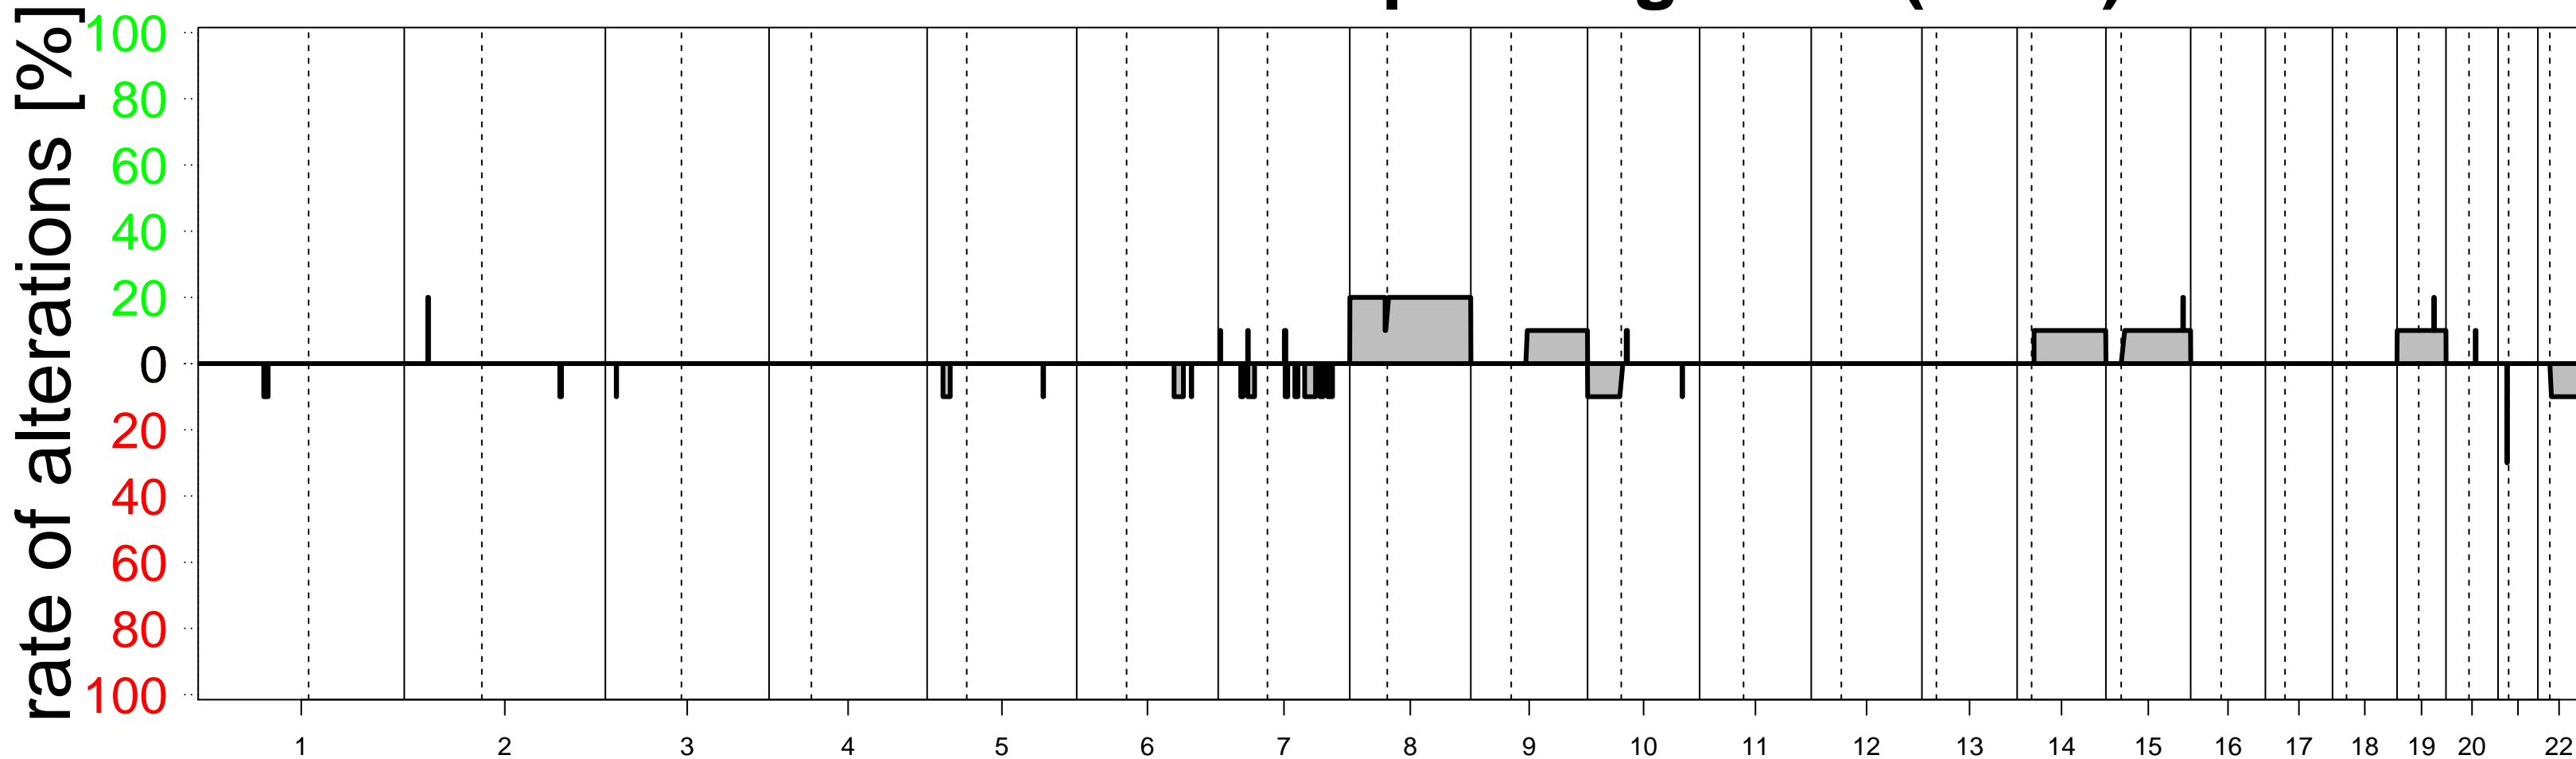

# m. c. low grade glioma, desmopl. infantile astroc.-gangliogl. (n=8)

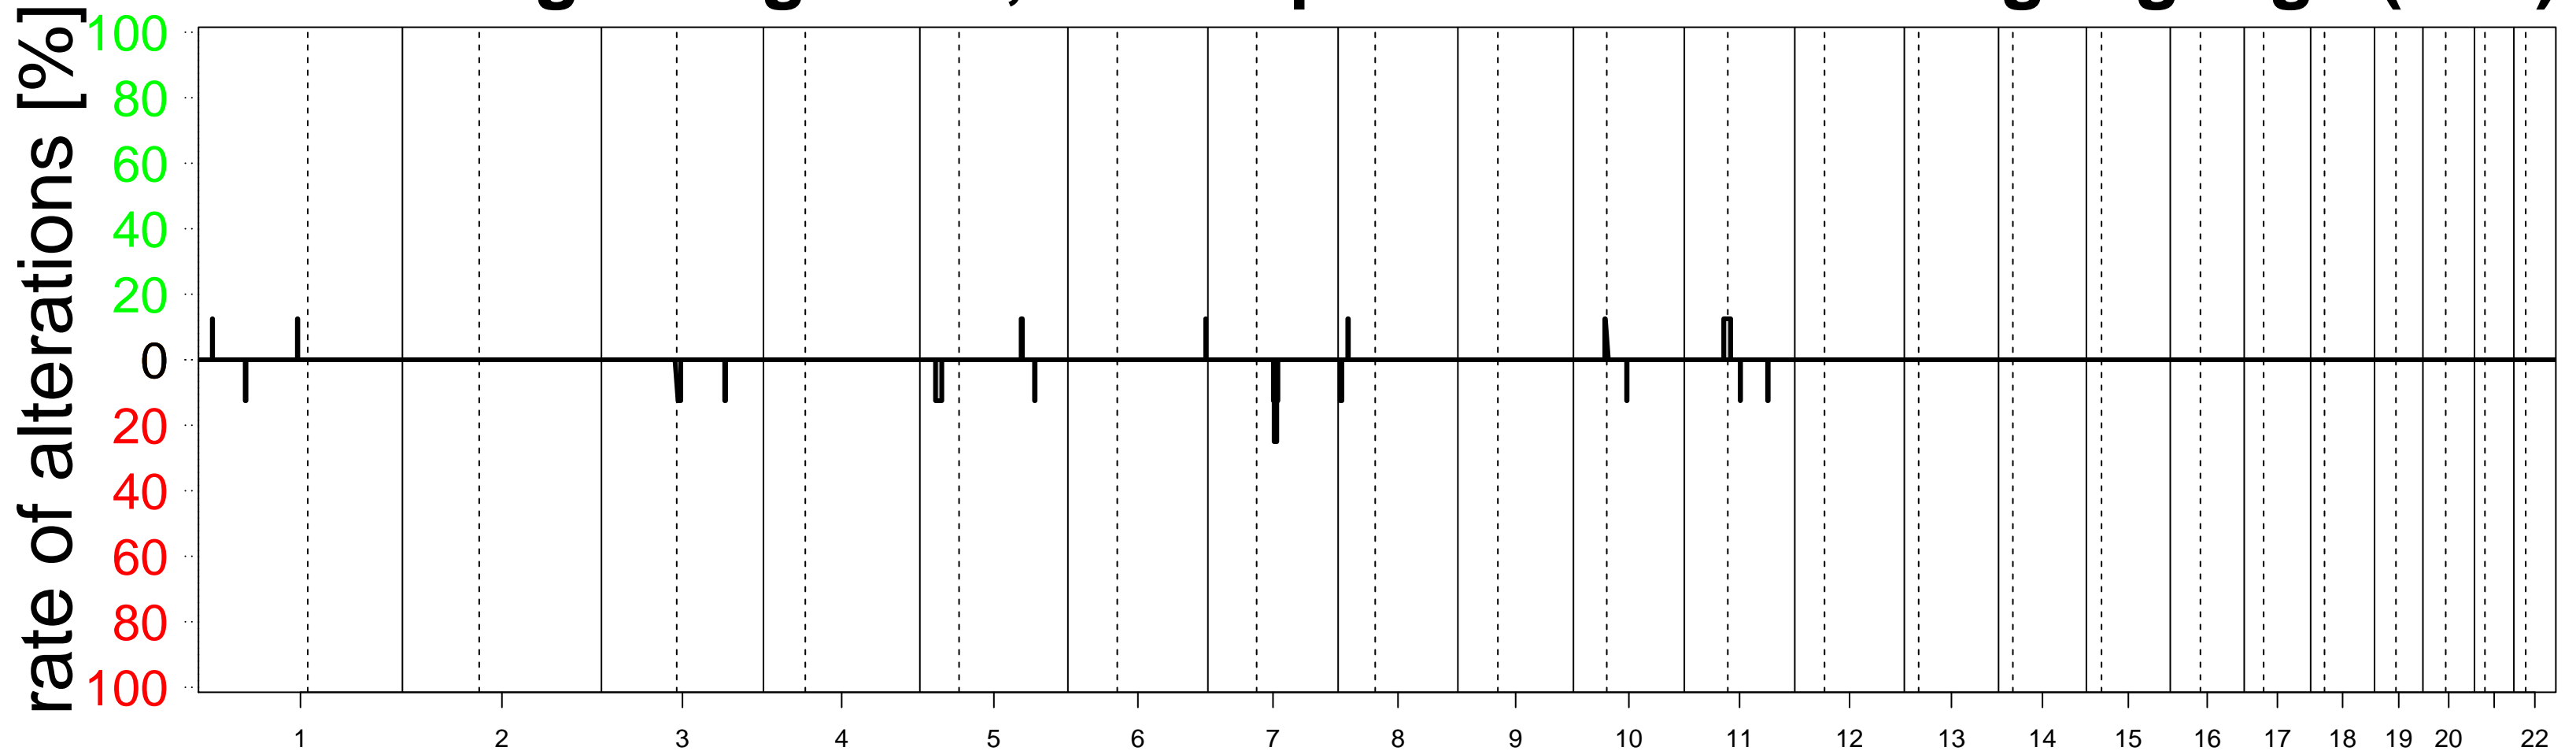



# m. c. low grade glioma, dysembryoplastic neuroepithelial tumor (n=44)

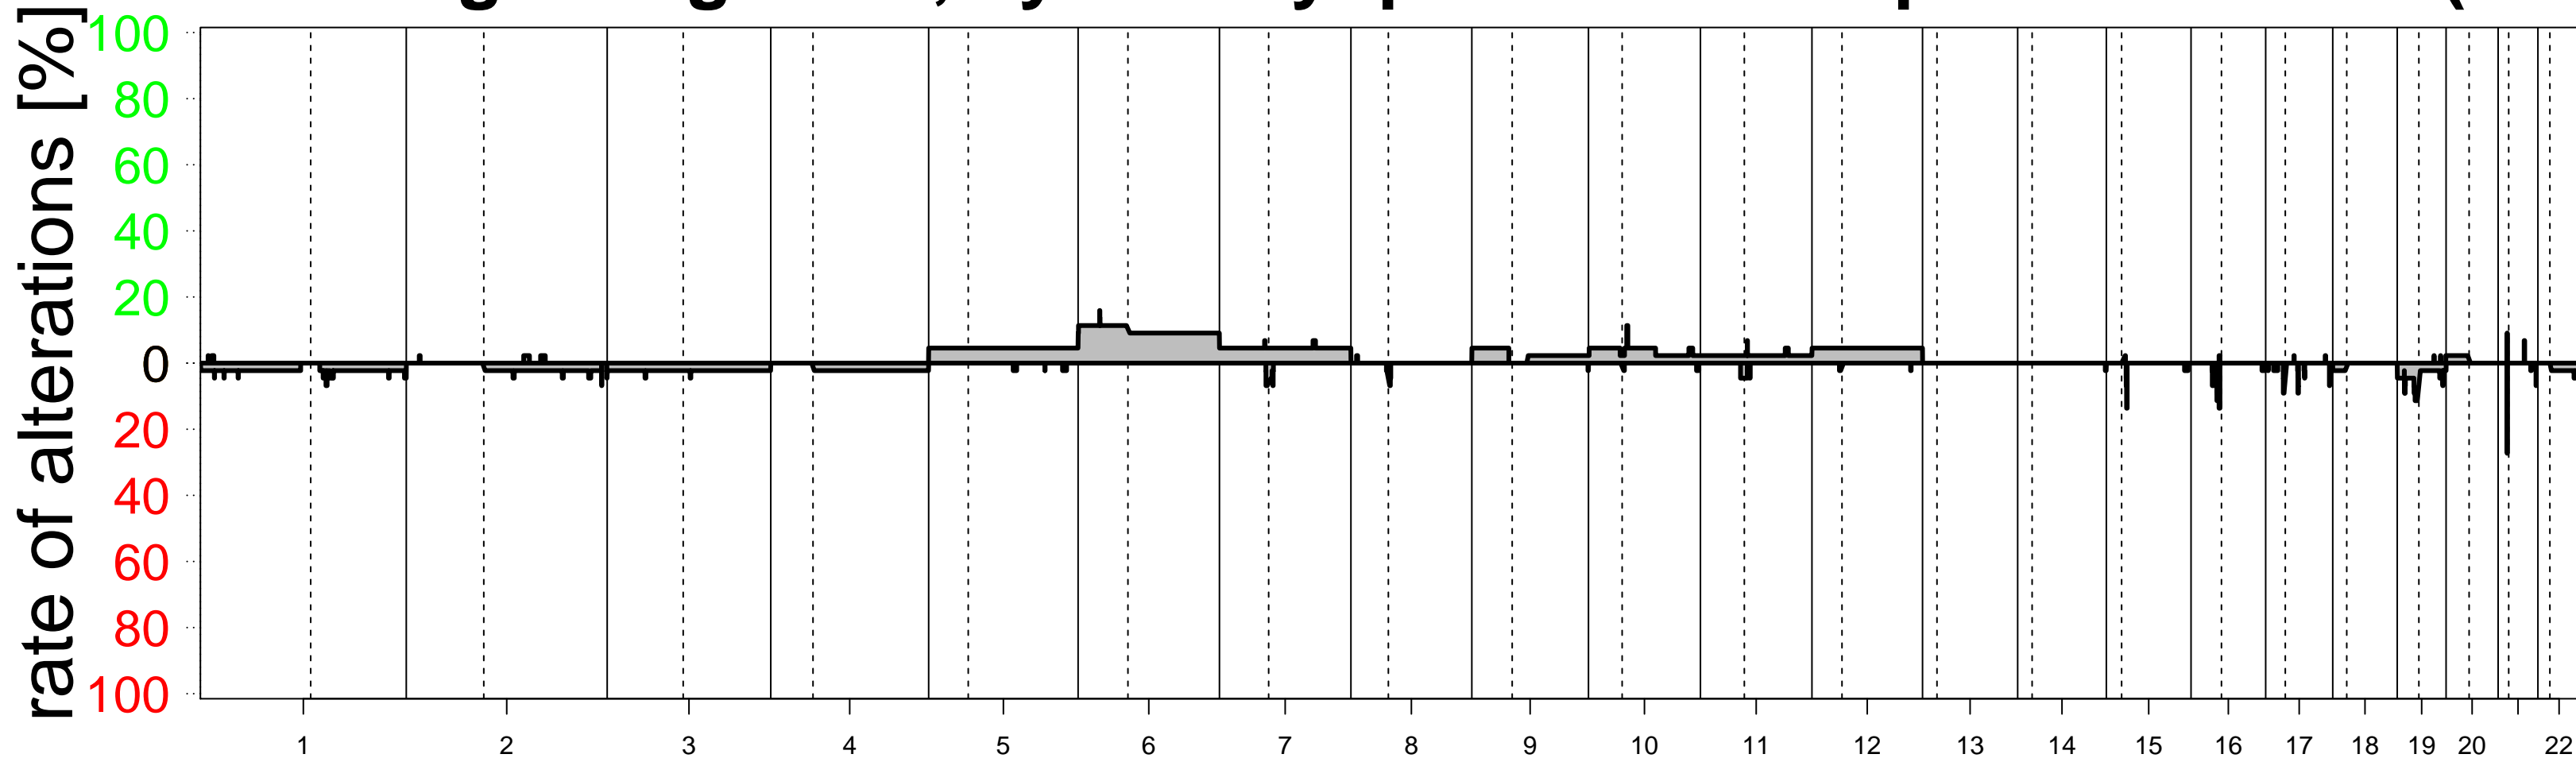

# m. c. low grade glioma, ganglioglioma (n=21)

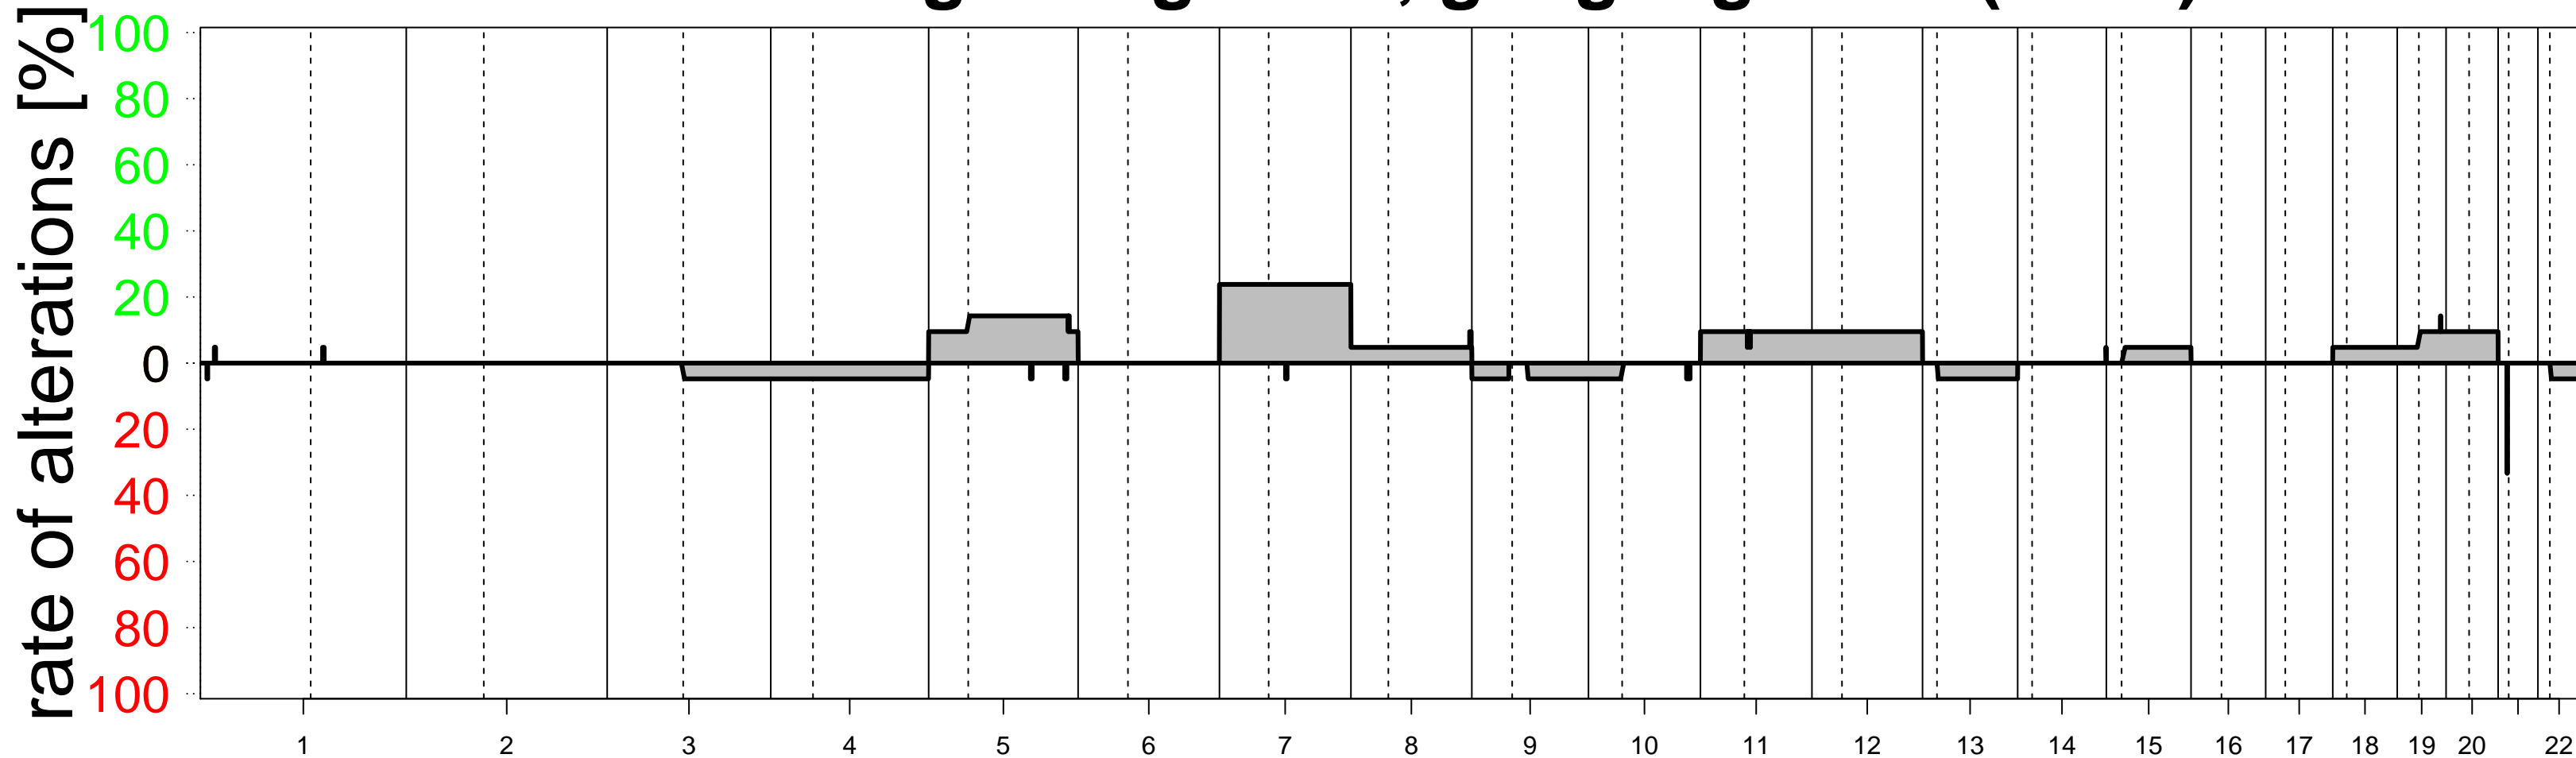

# m. c. low grade glioma, MYB-MYBL1 (n=22)

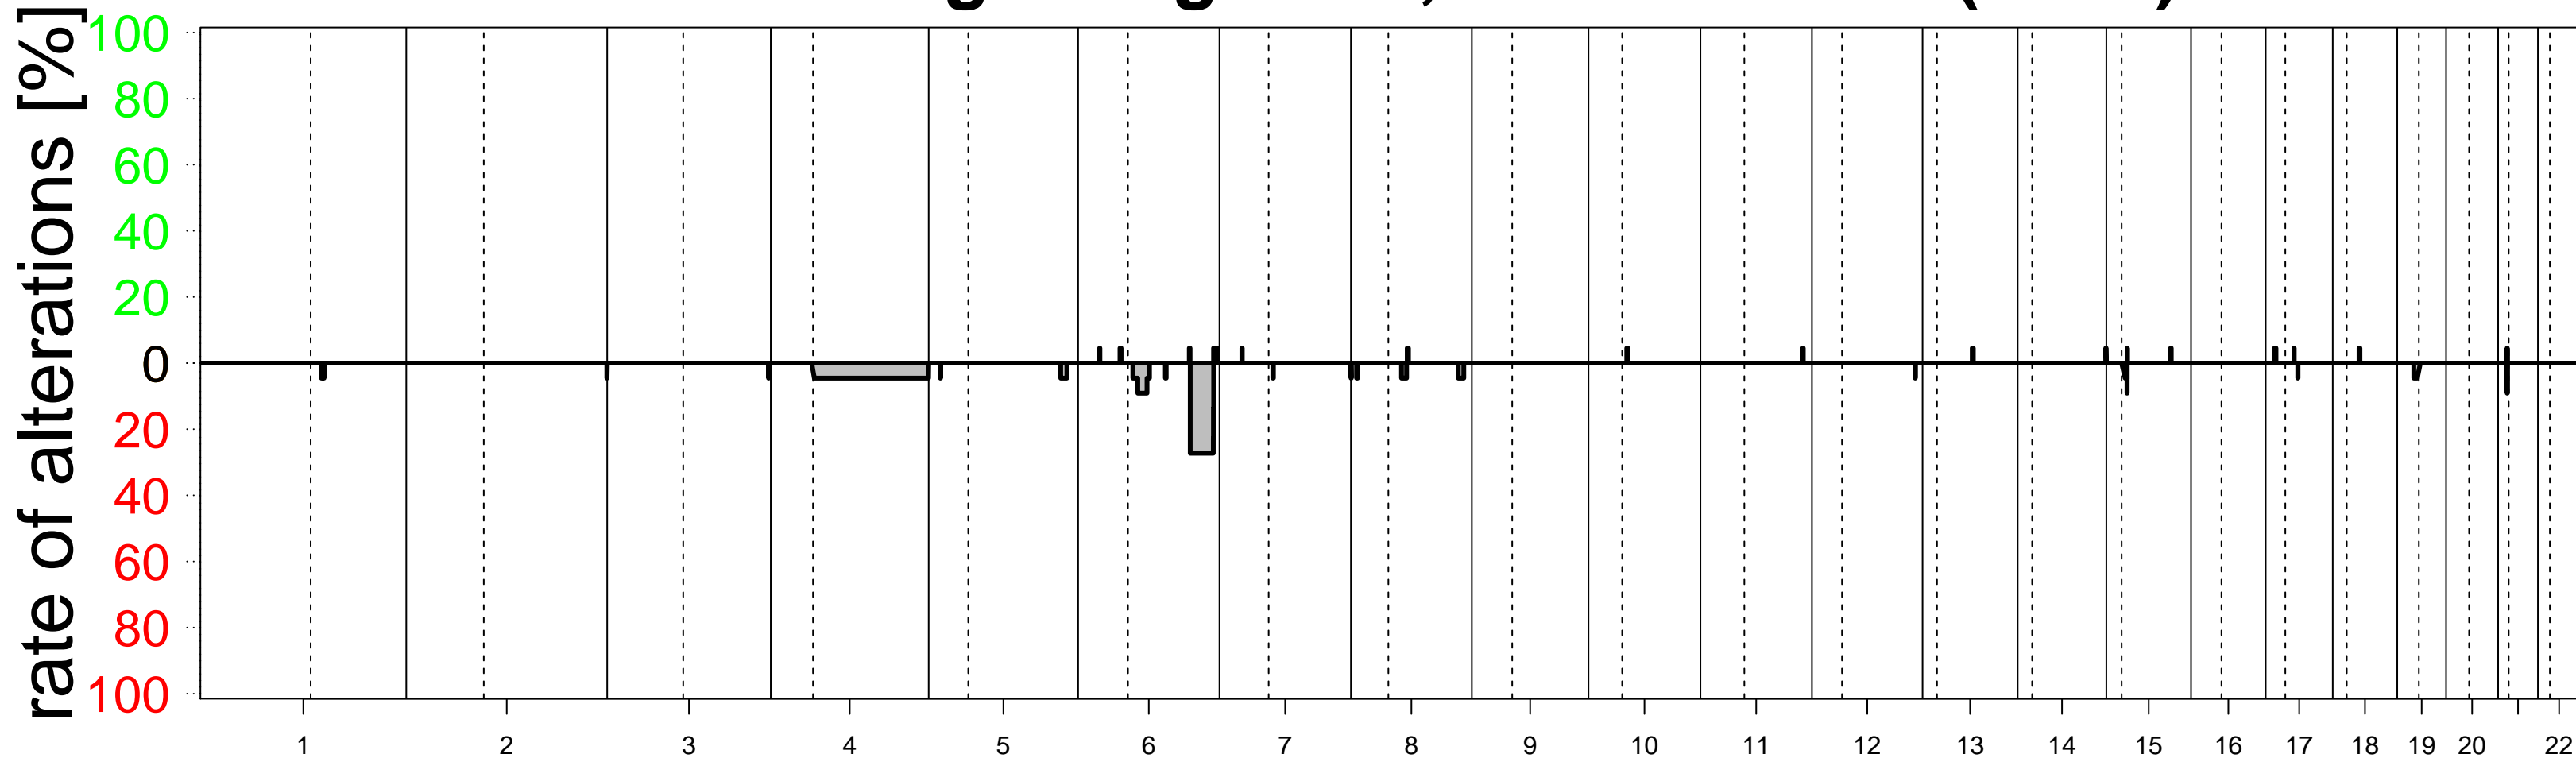

# m. c. low grade glioma, rosette forming glioneuronal tumor (n=9)

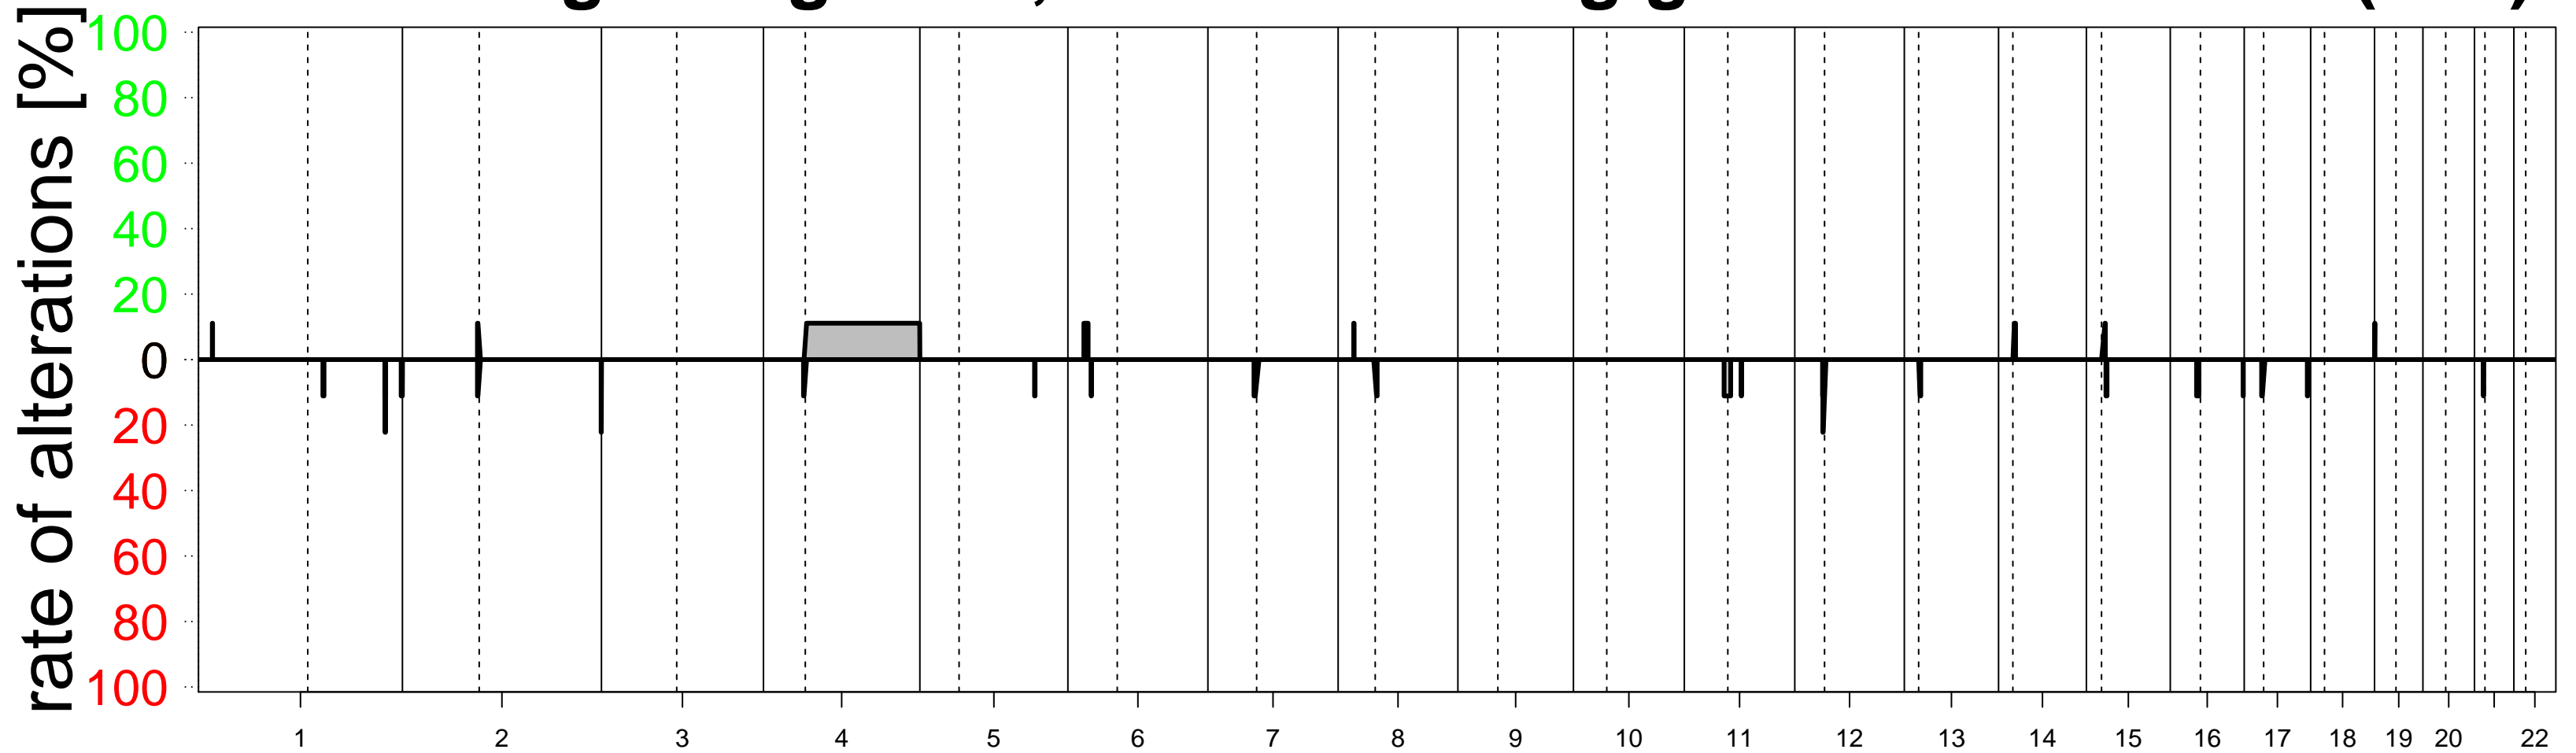

# m. c. low grade glioma, subclass midline pilocytic astrocytoma (n=38)

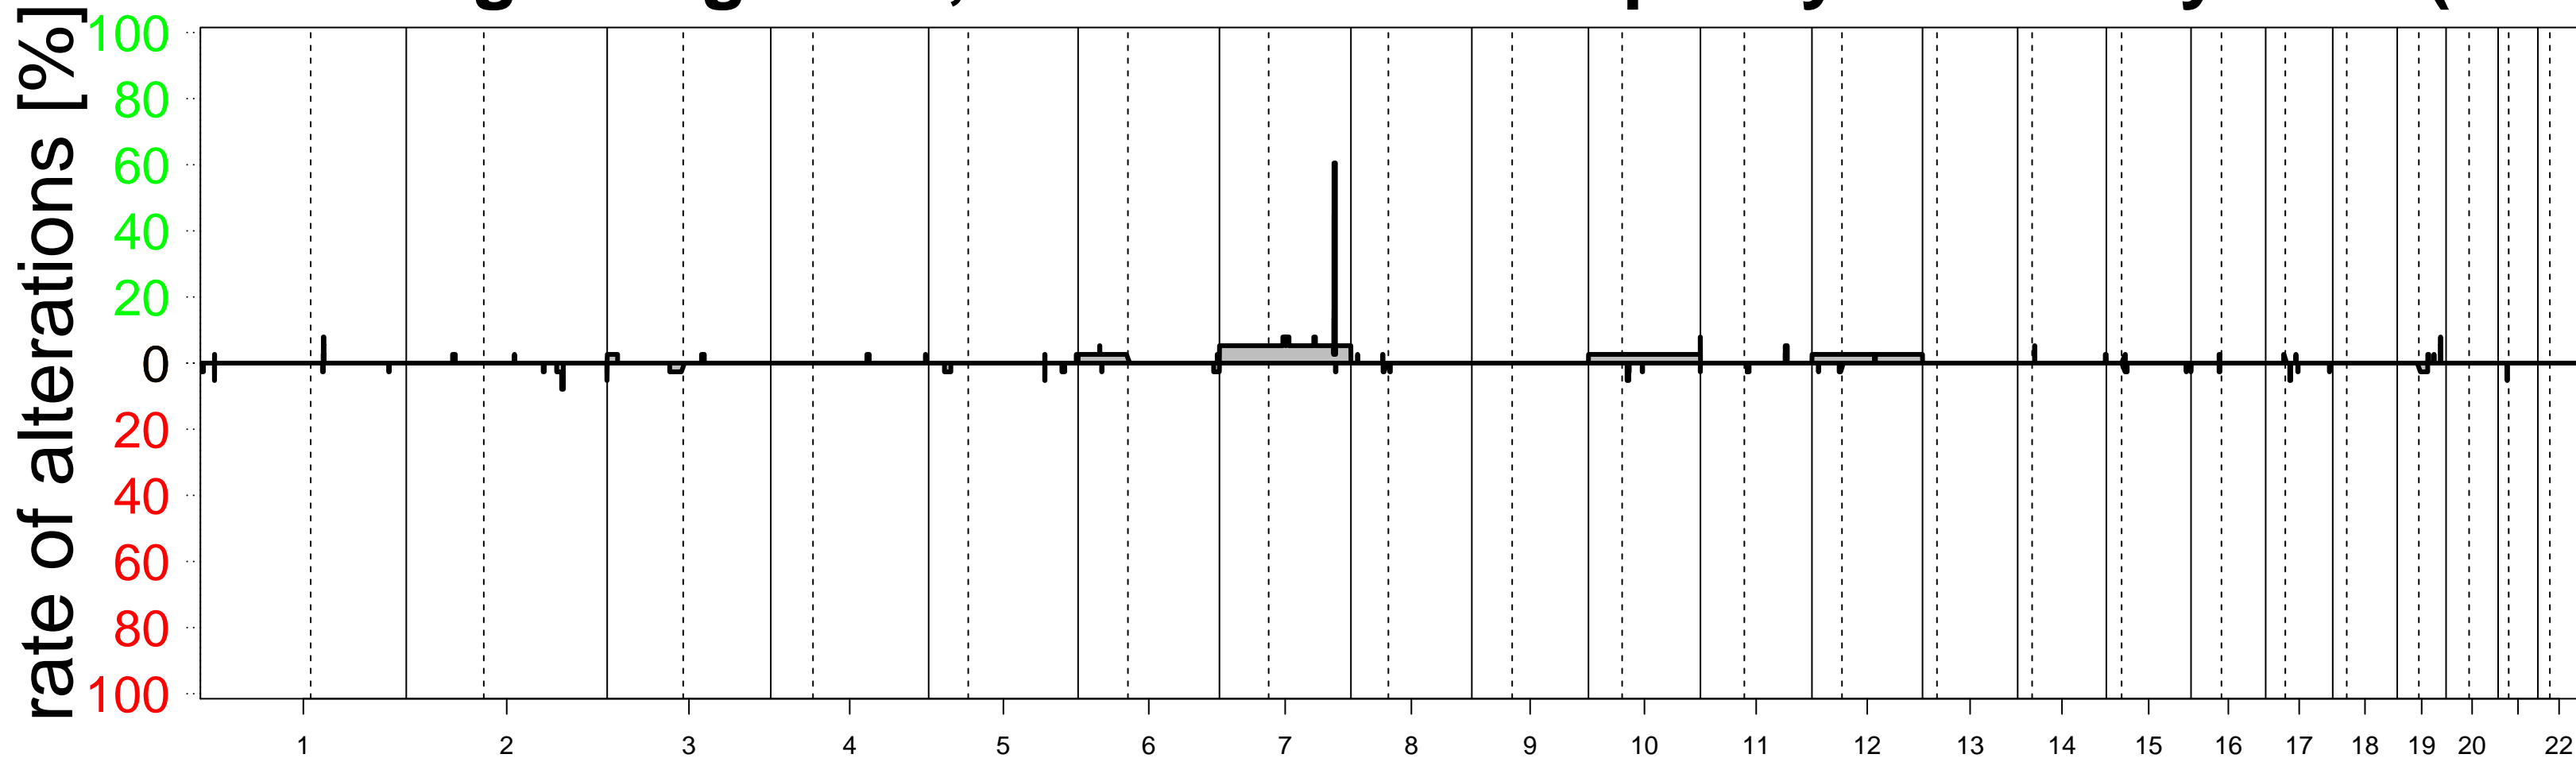

# m. c. low grade glioma, subcl. hemispheric piloc. astroc. – gangliogl. (n=24)

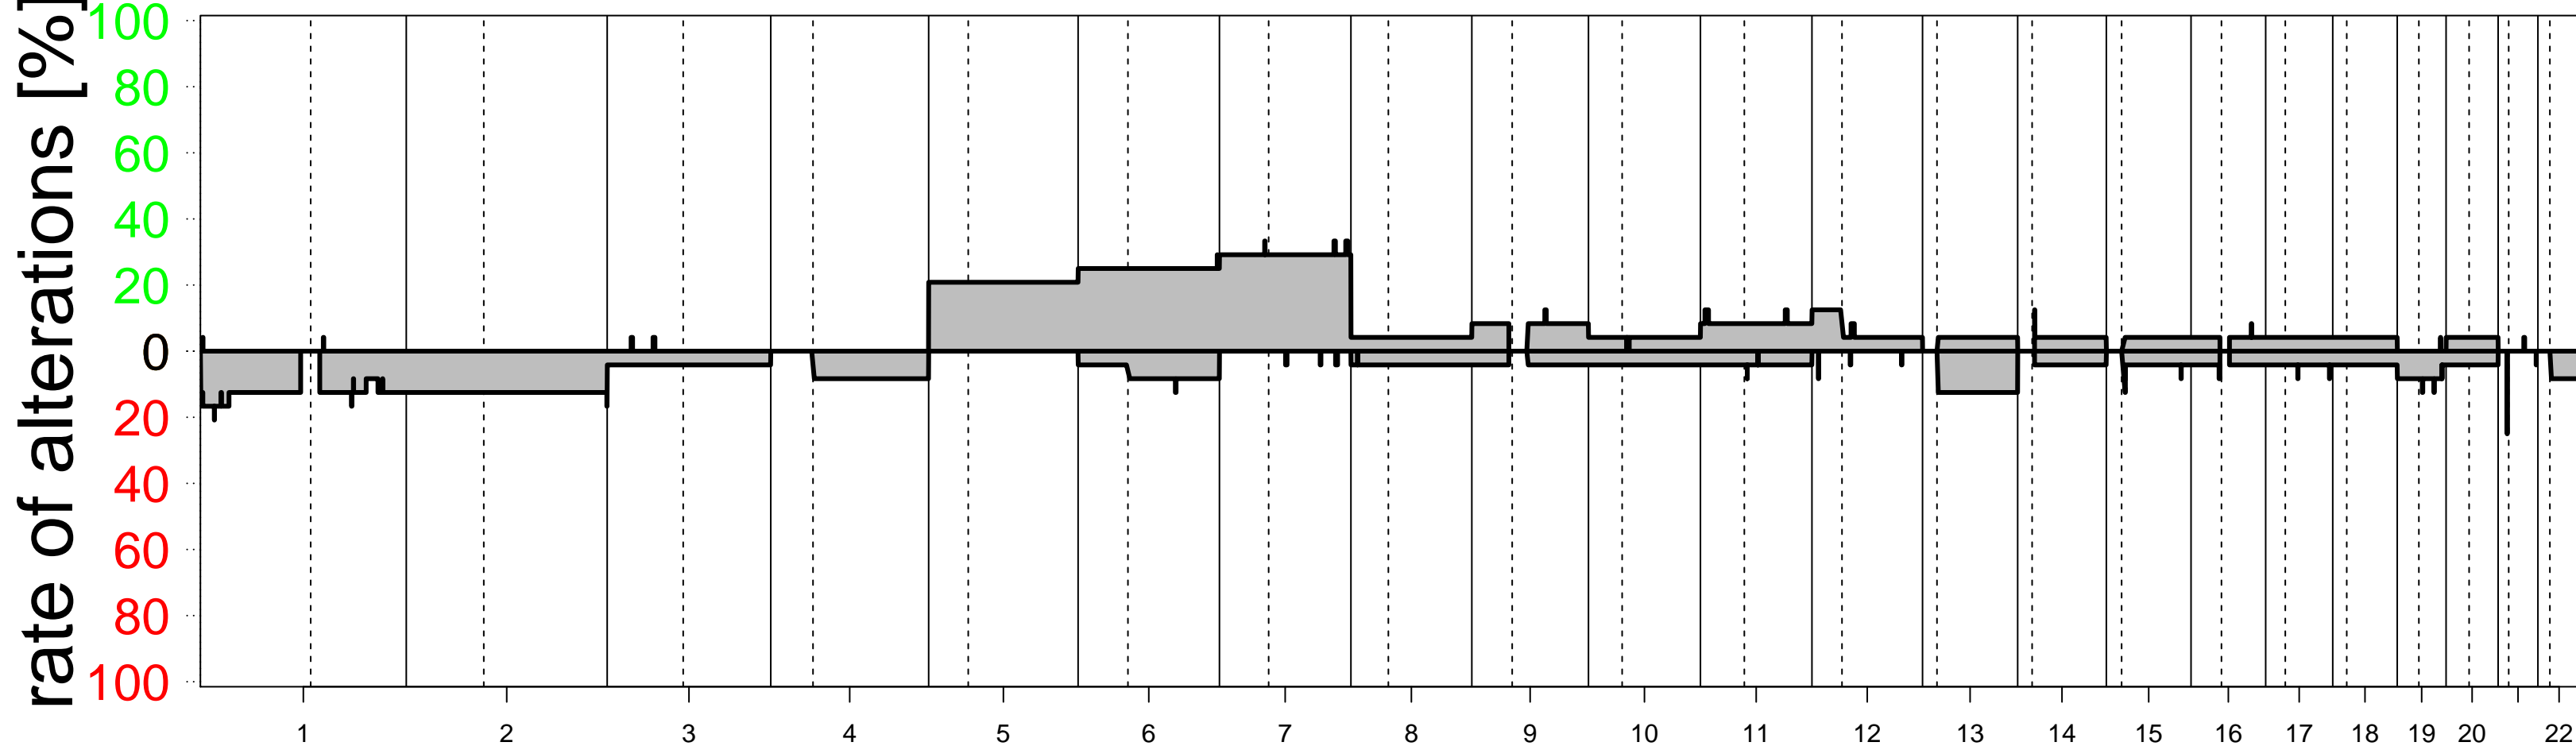

# m. c. low grade glioma, subcl. posterior fossa pilocytic astrocytoma (n=11)

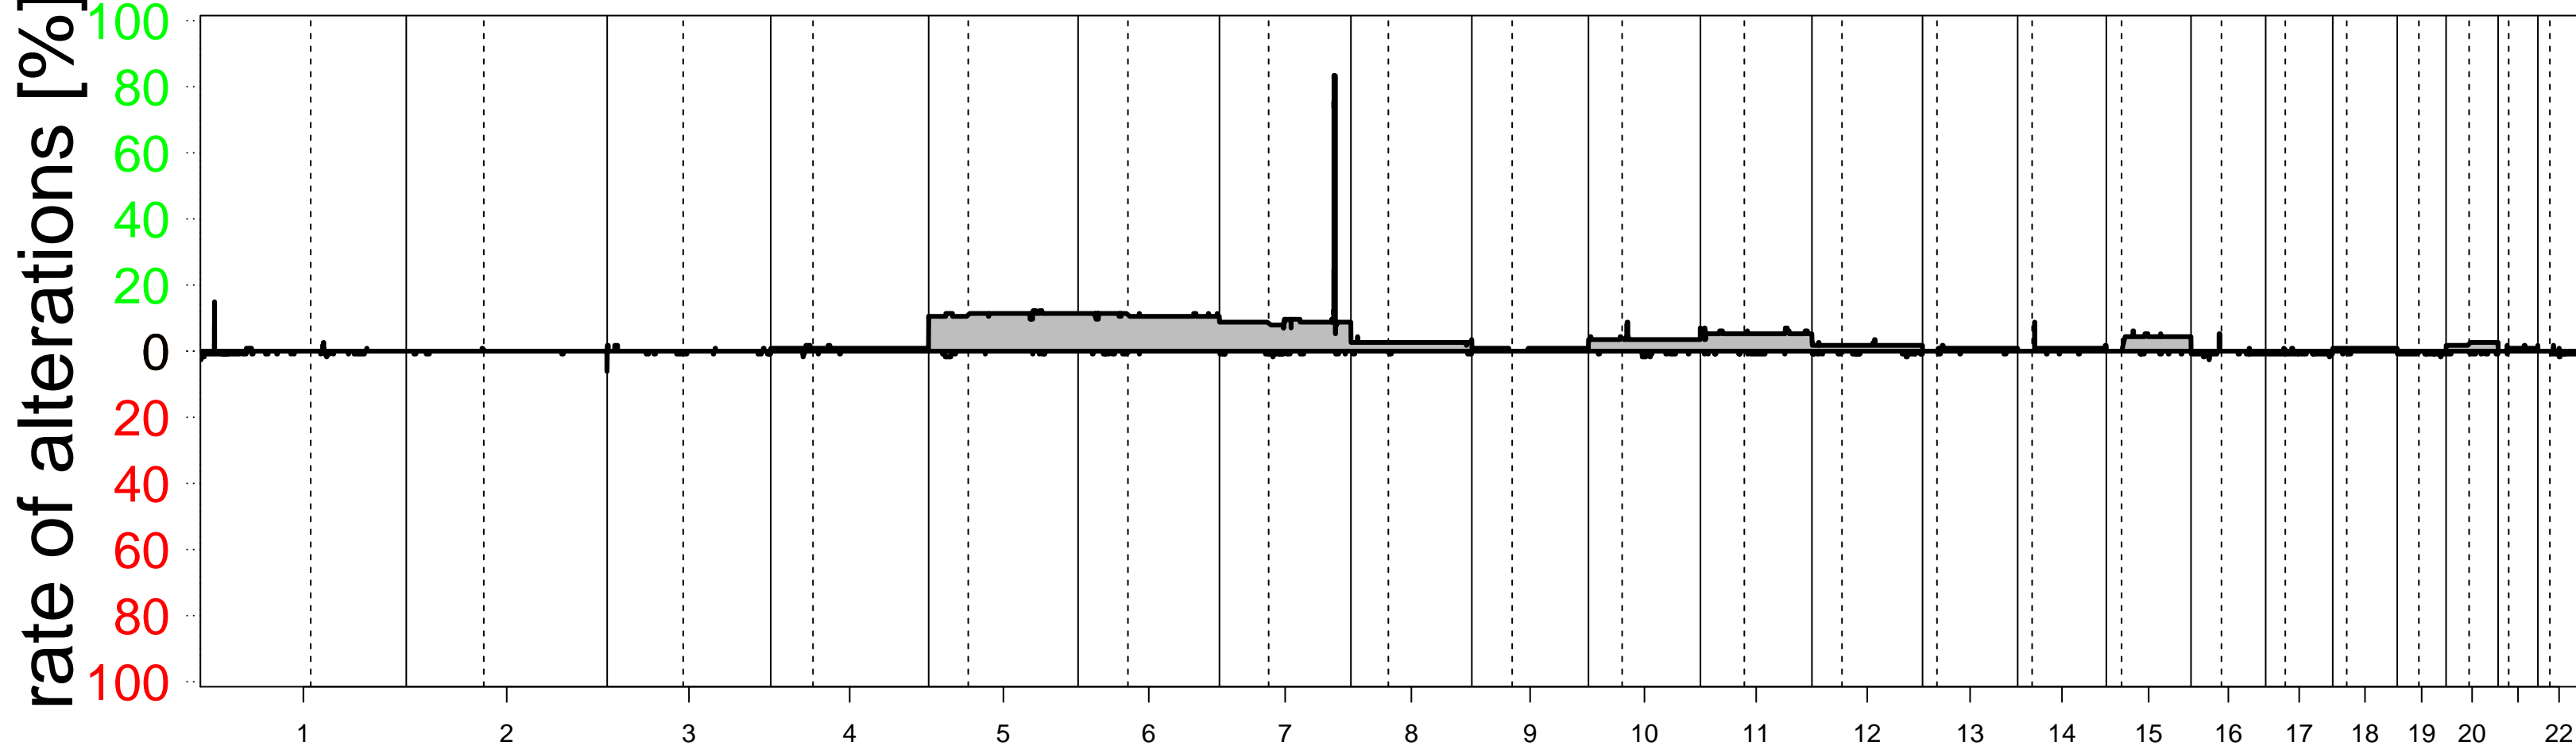

# m. c. low grade glioma, subependymal giant cell astrocytoma (n=21)

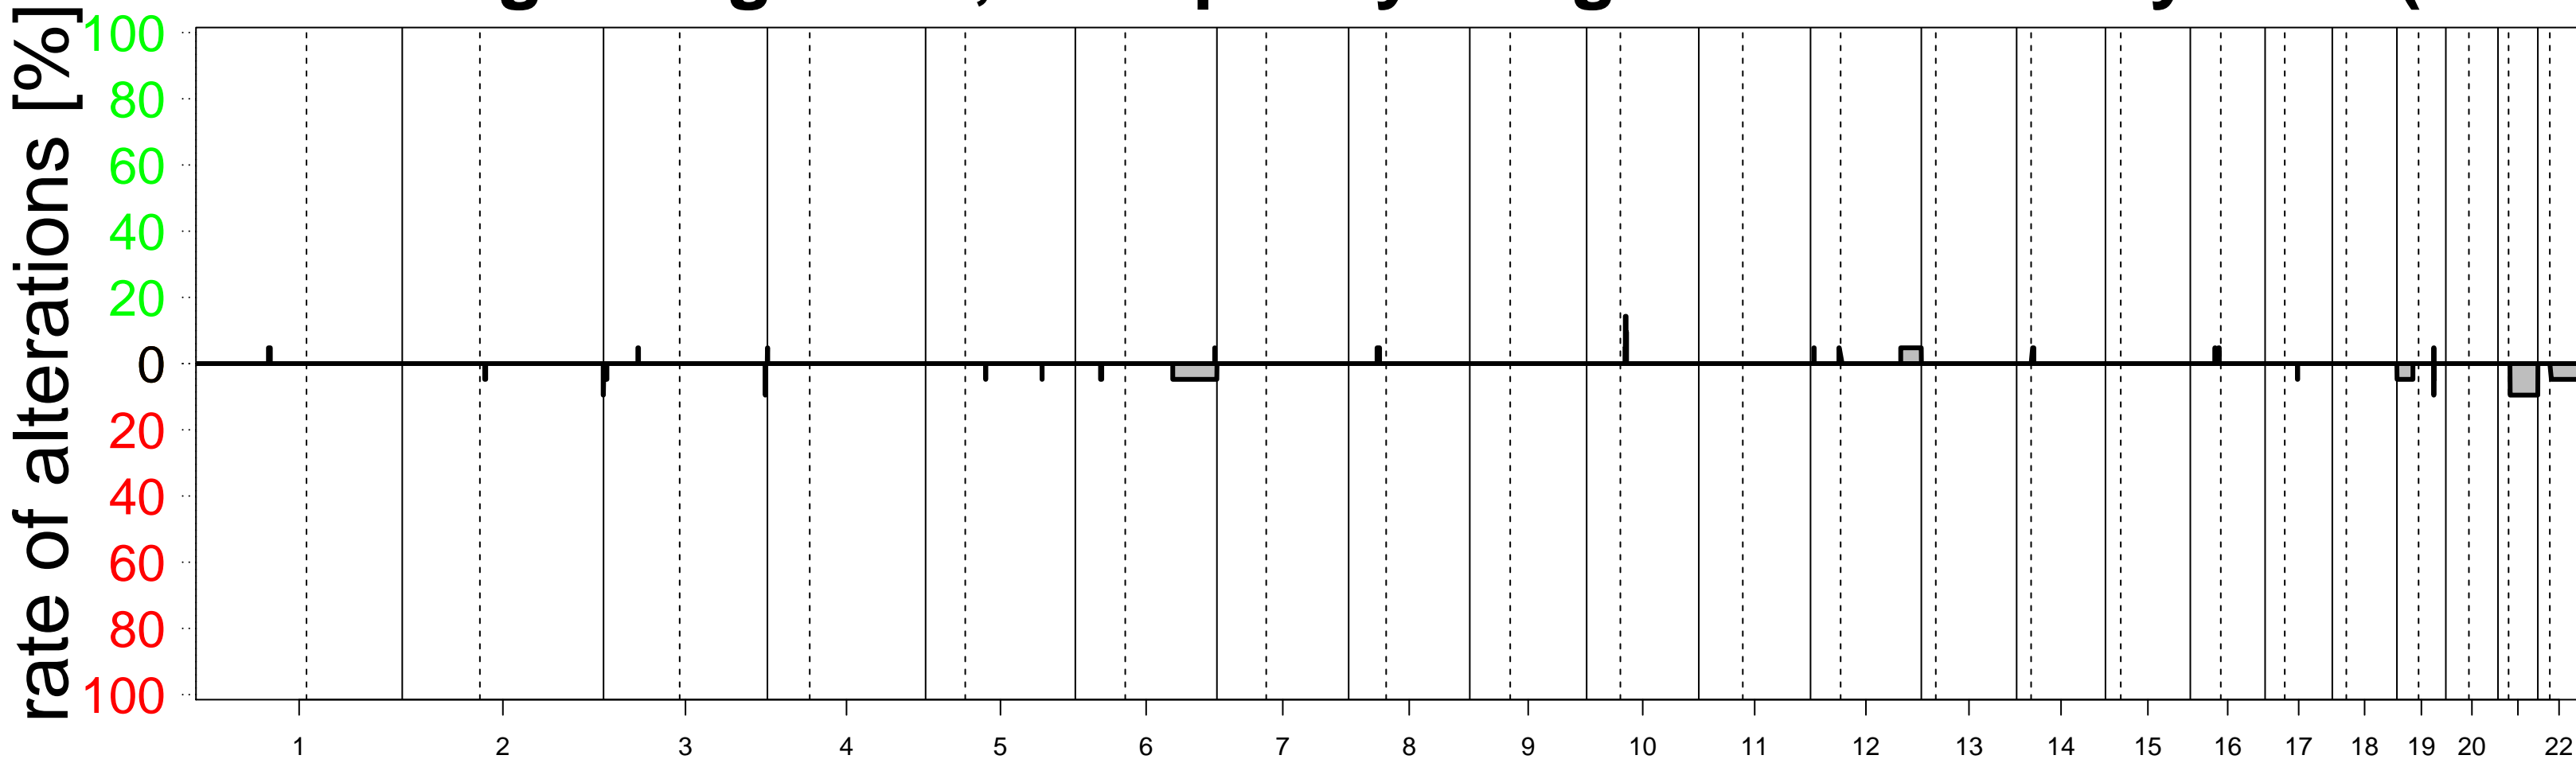



# m. c. lymphoma (n=13)

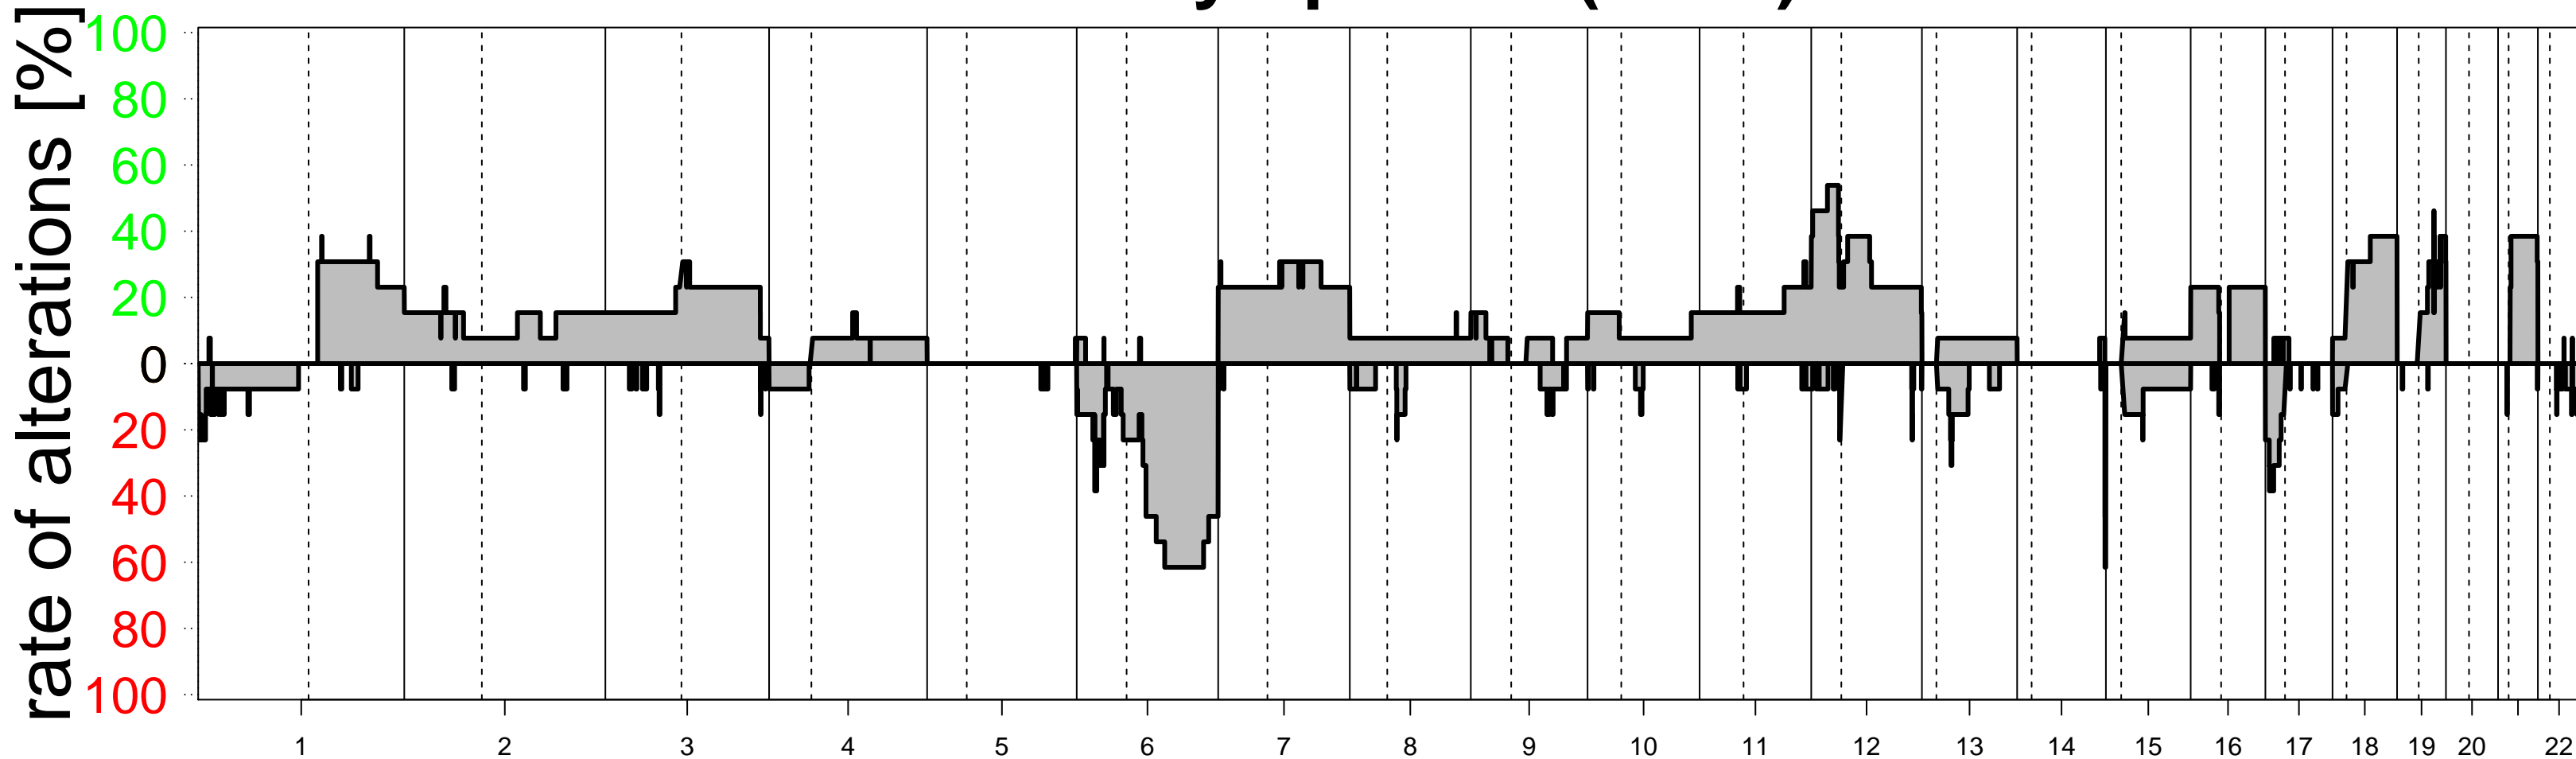

# m. c. medulloblastoma, subclass group 3 (n=77)

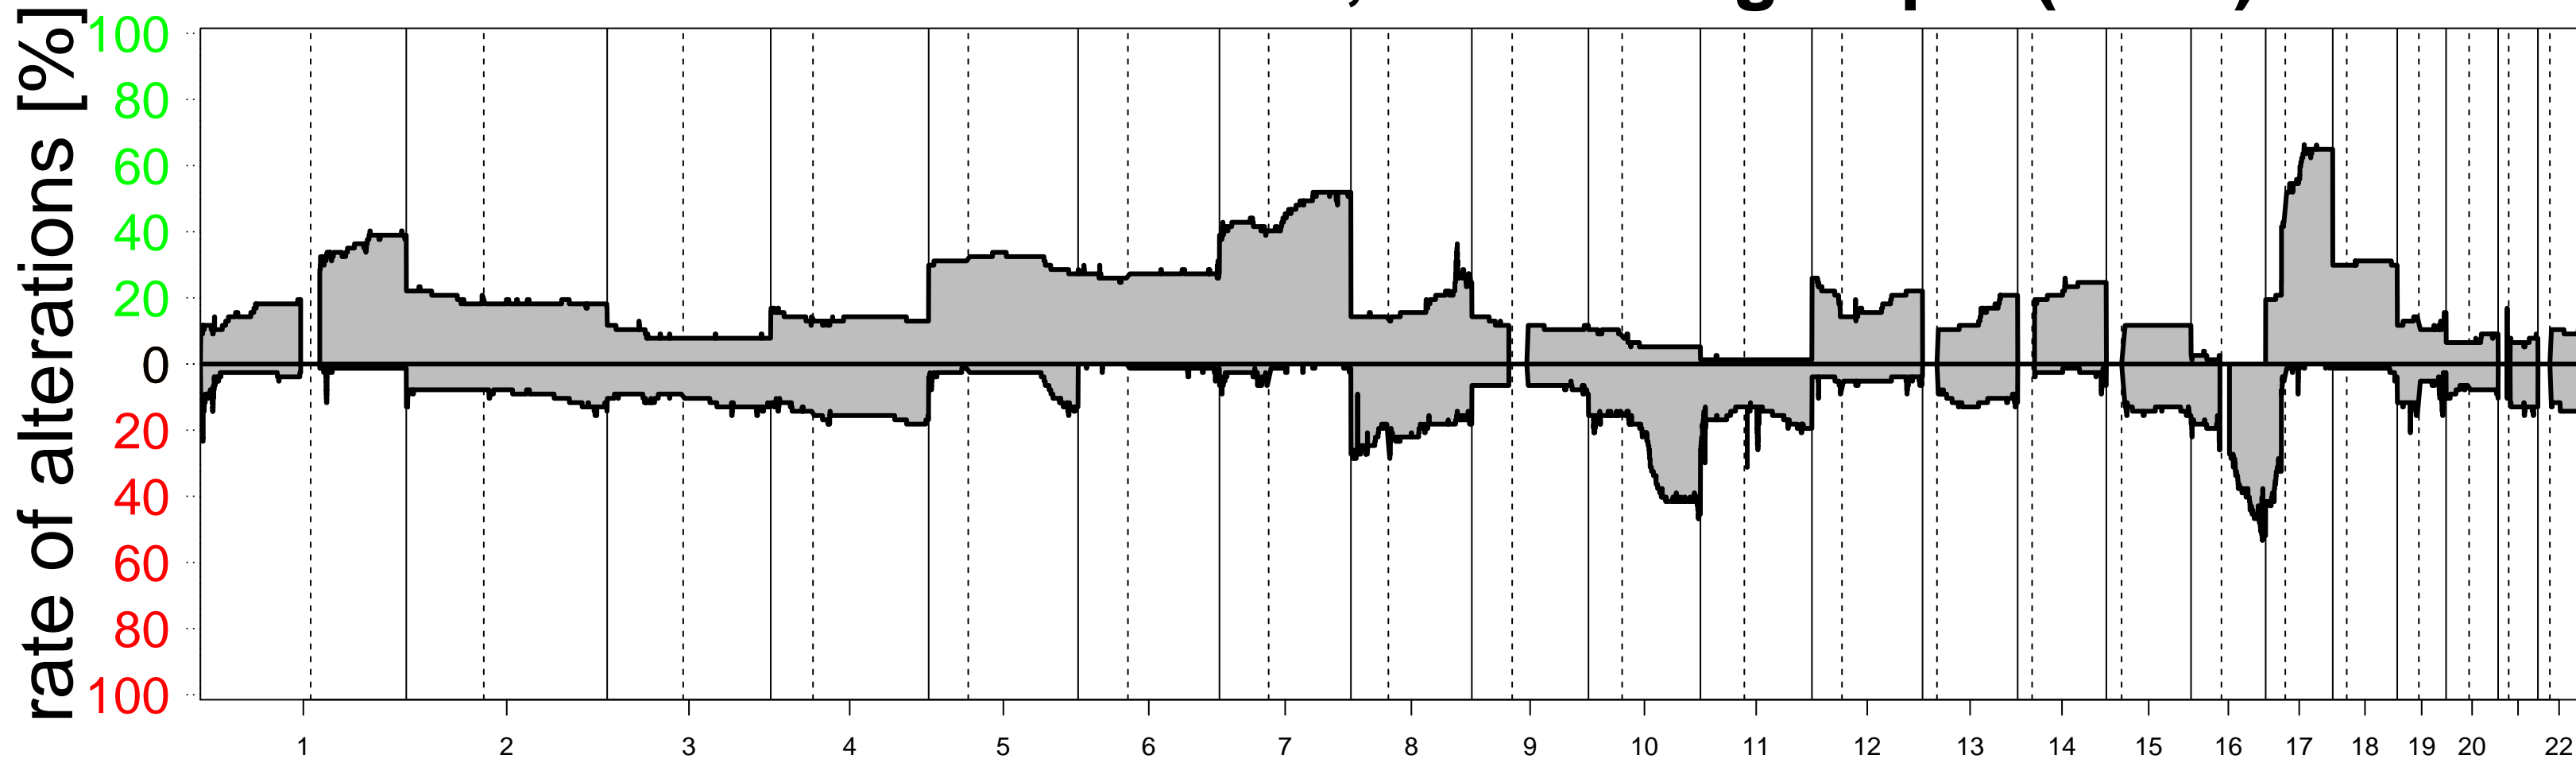

# m. c. medulloblastoma, subclass group 4 (n=138)

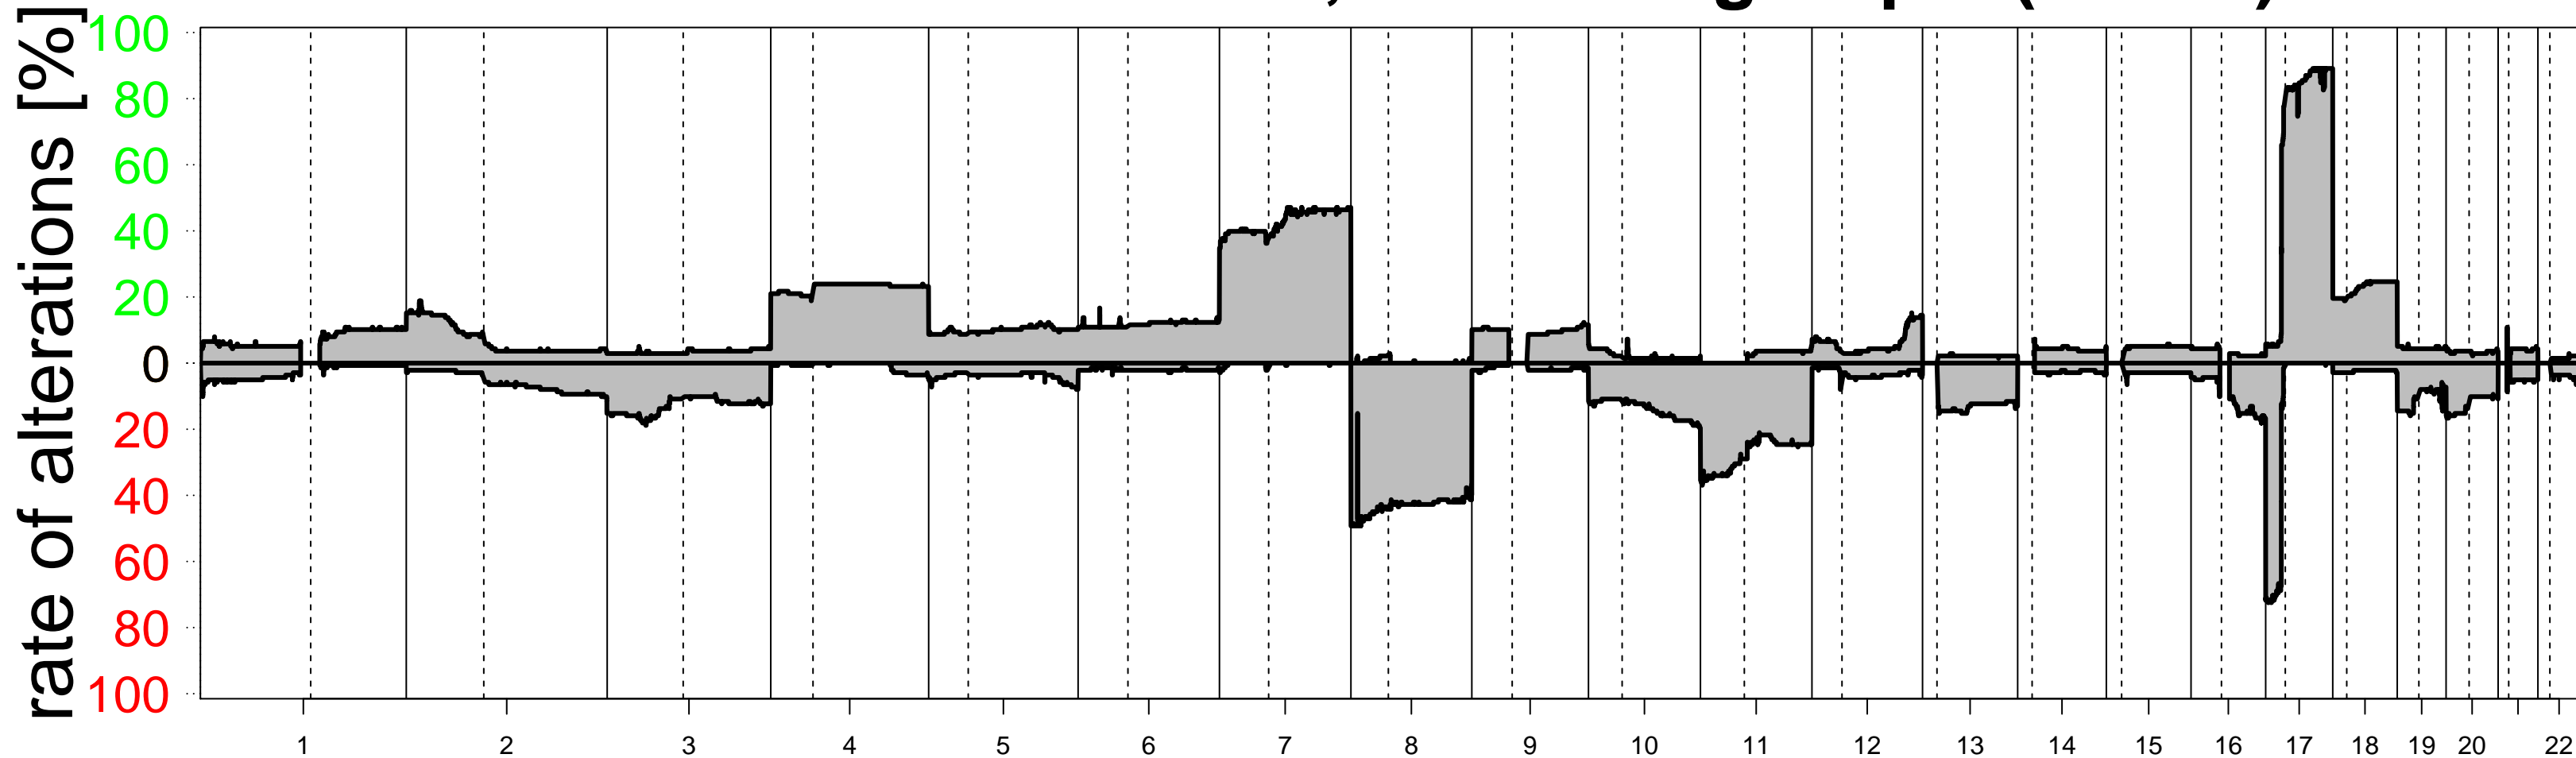

# m. c. medulloblastoma, subclass SHH A (children and adult) (n=84)

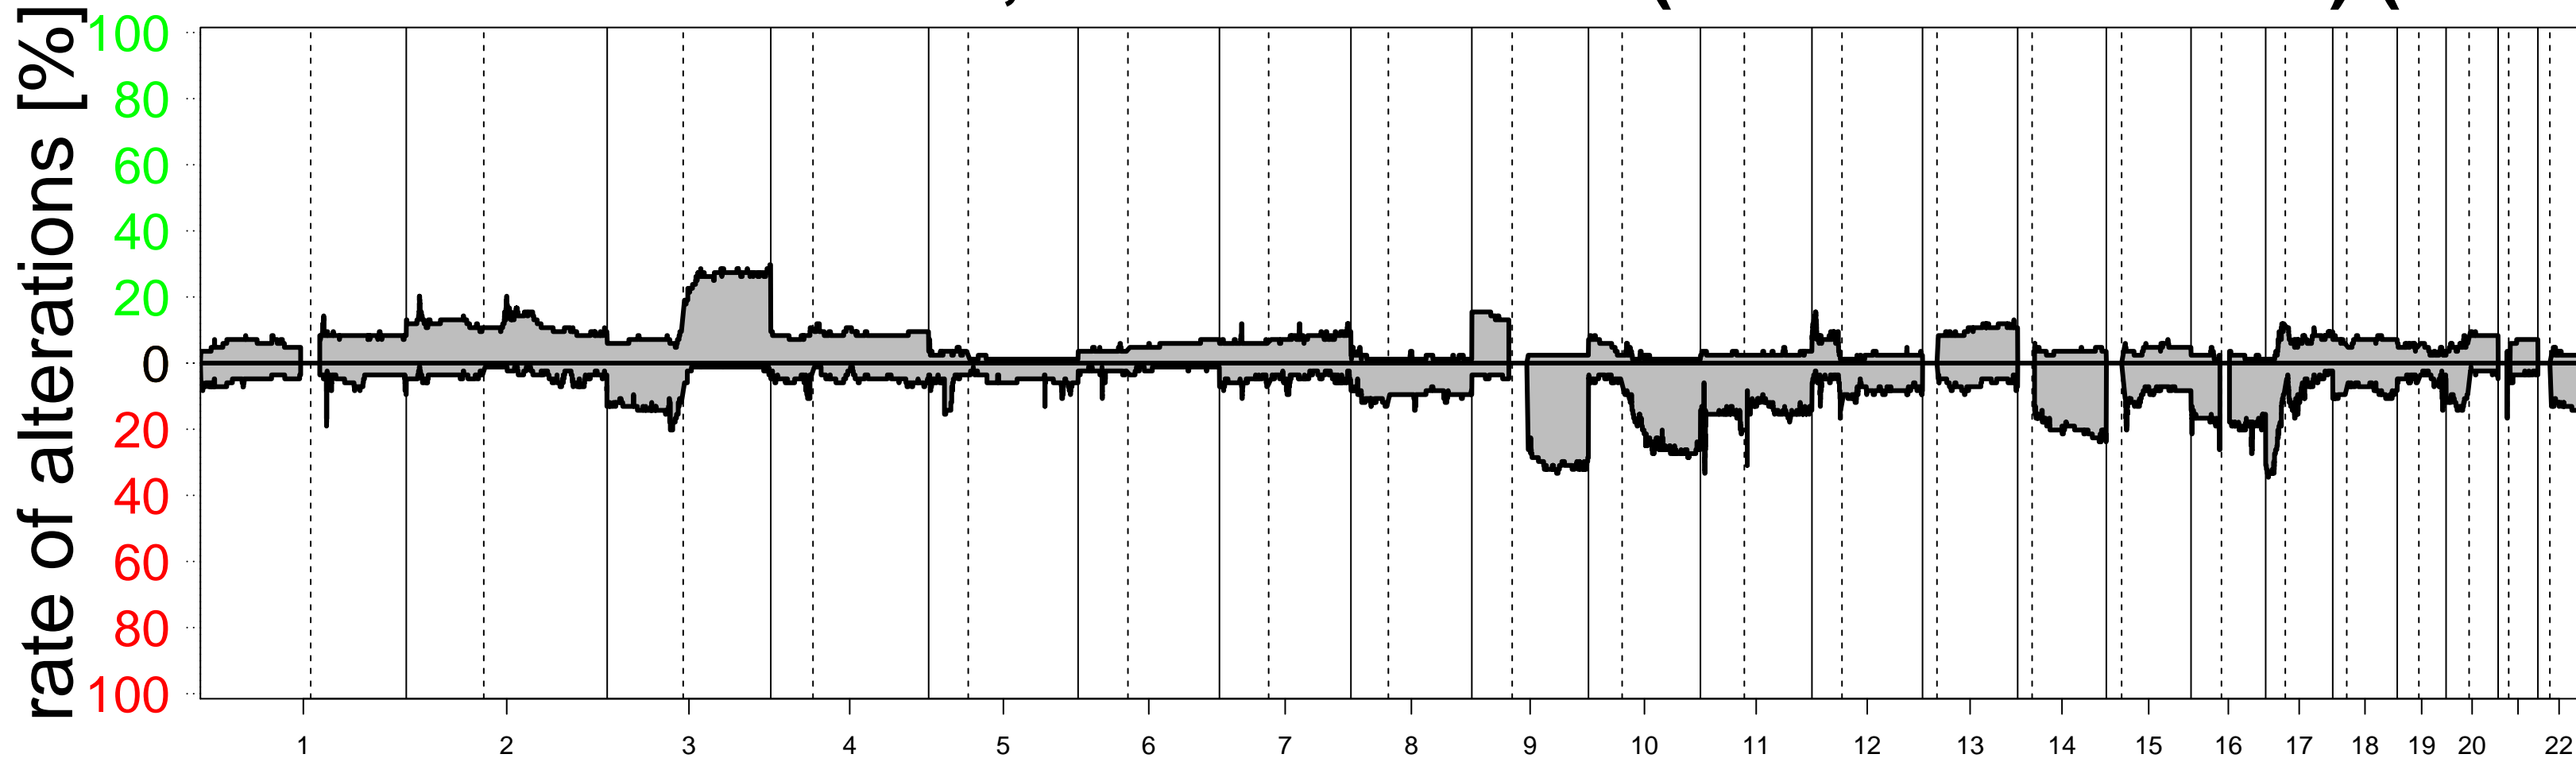

# m. c. medulloblastoma, subclass SHH B (infant) (n=52)

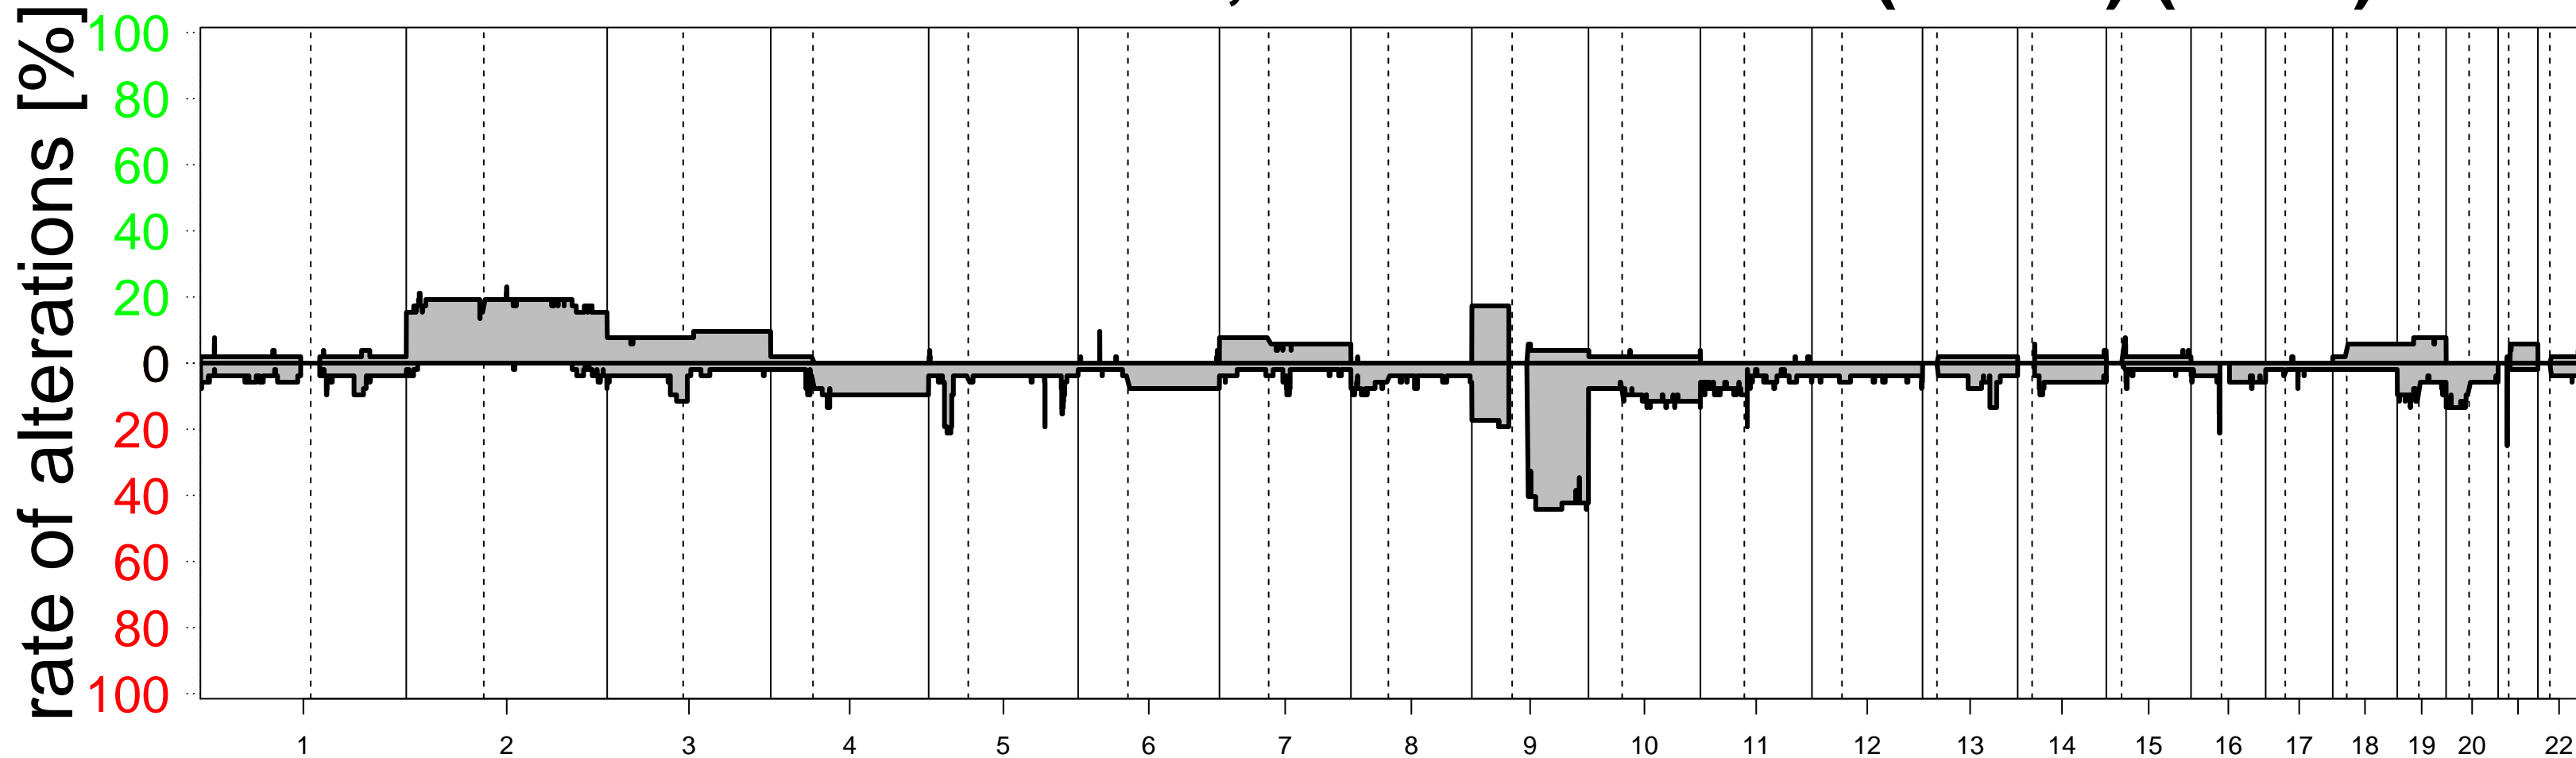

# m. c. medulloblastoma, WNT (n=39)

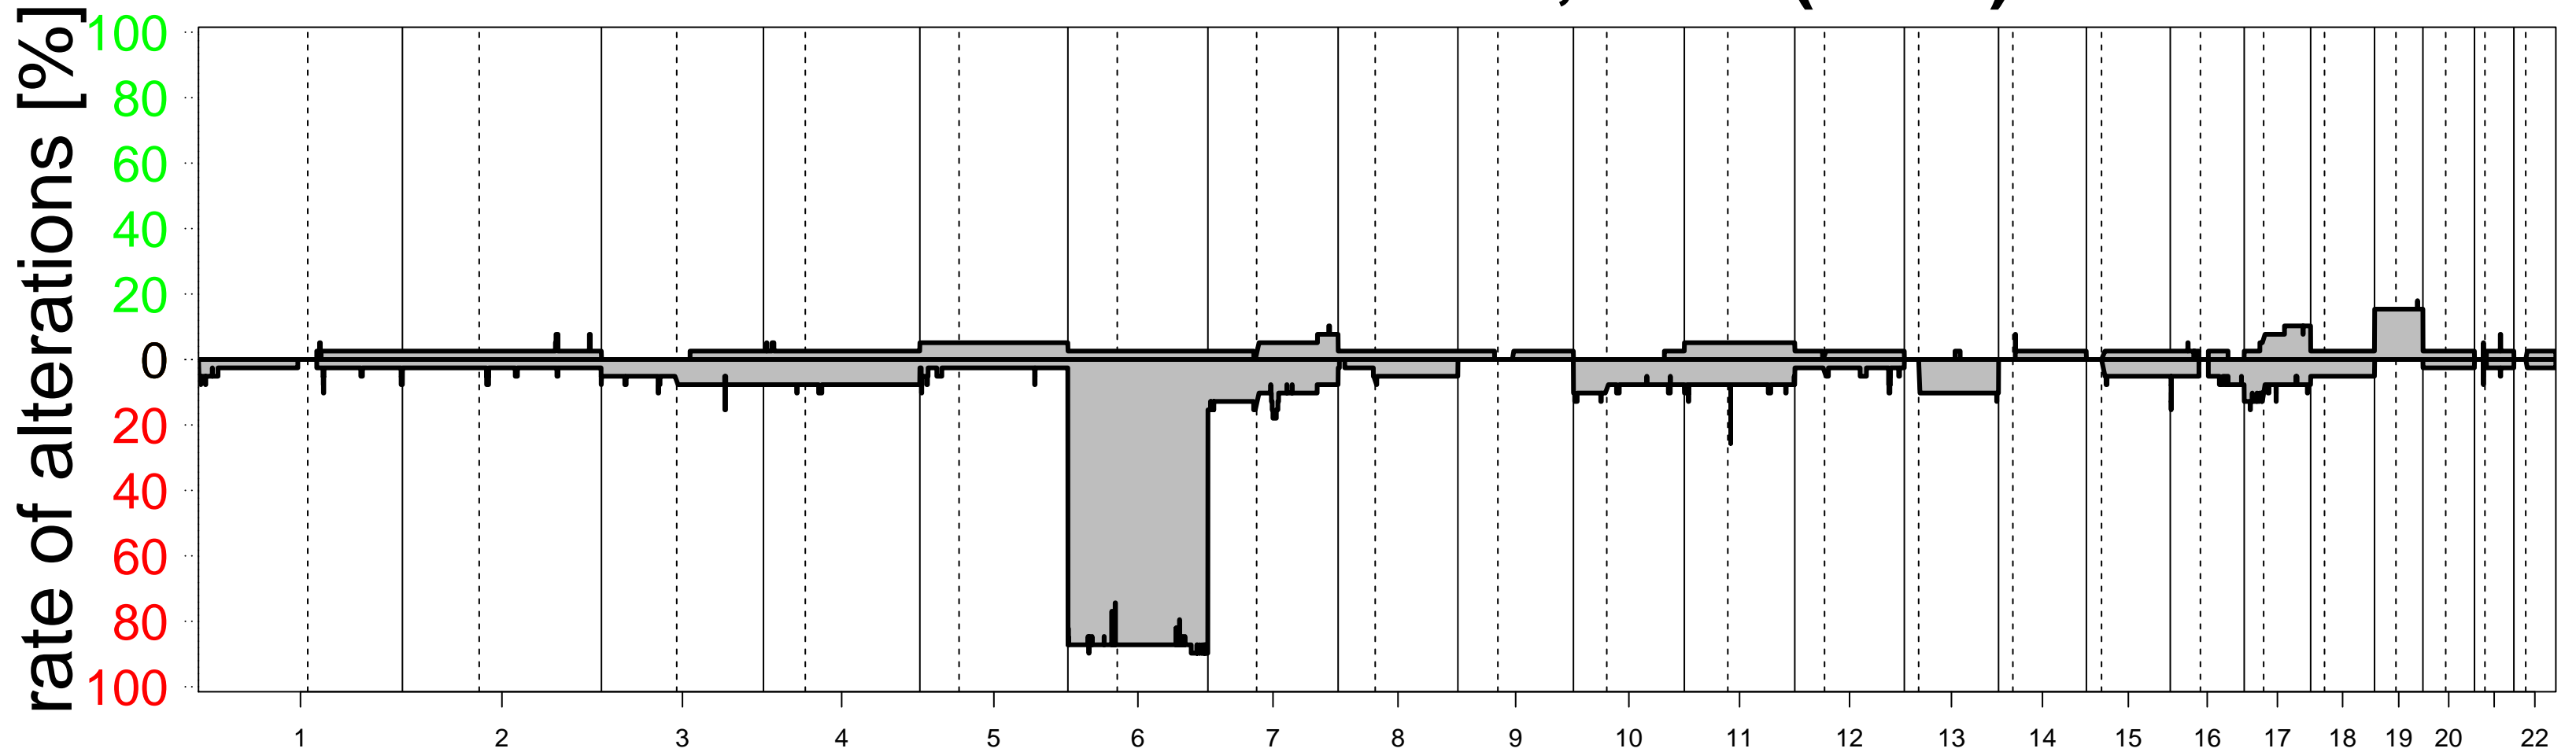

# m. c. melanocytoma (n=15)

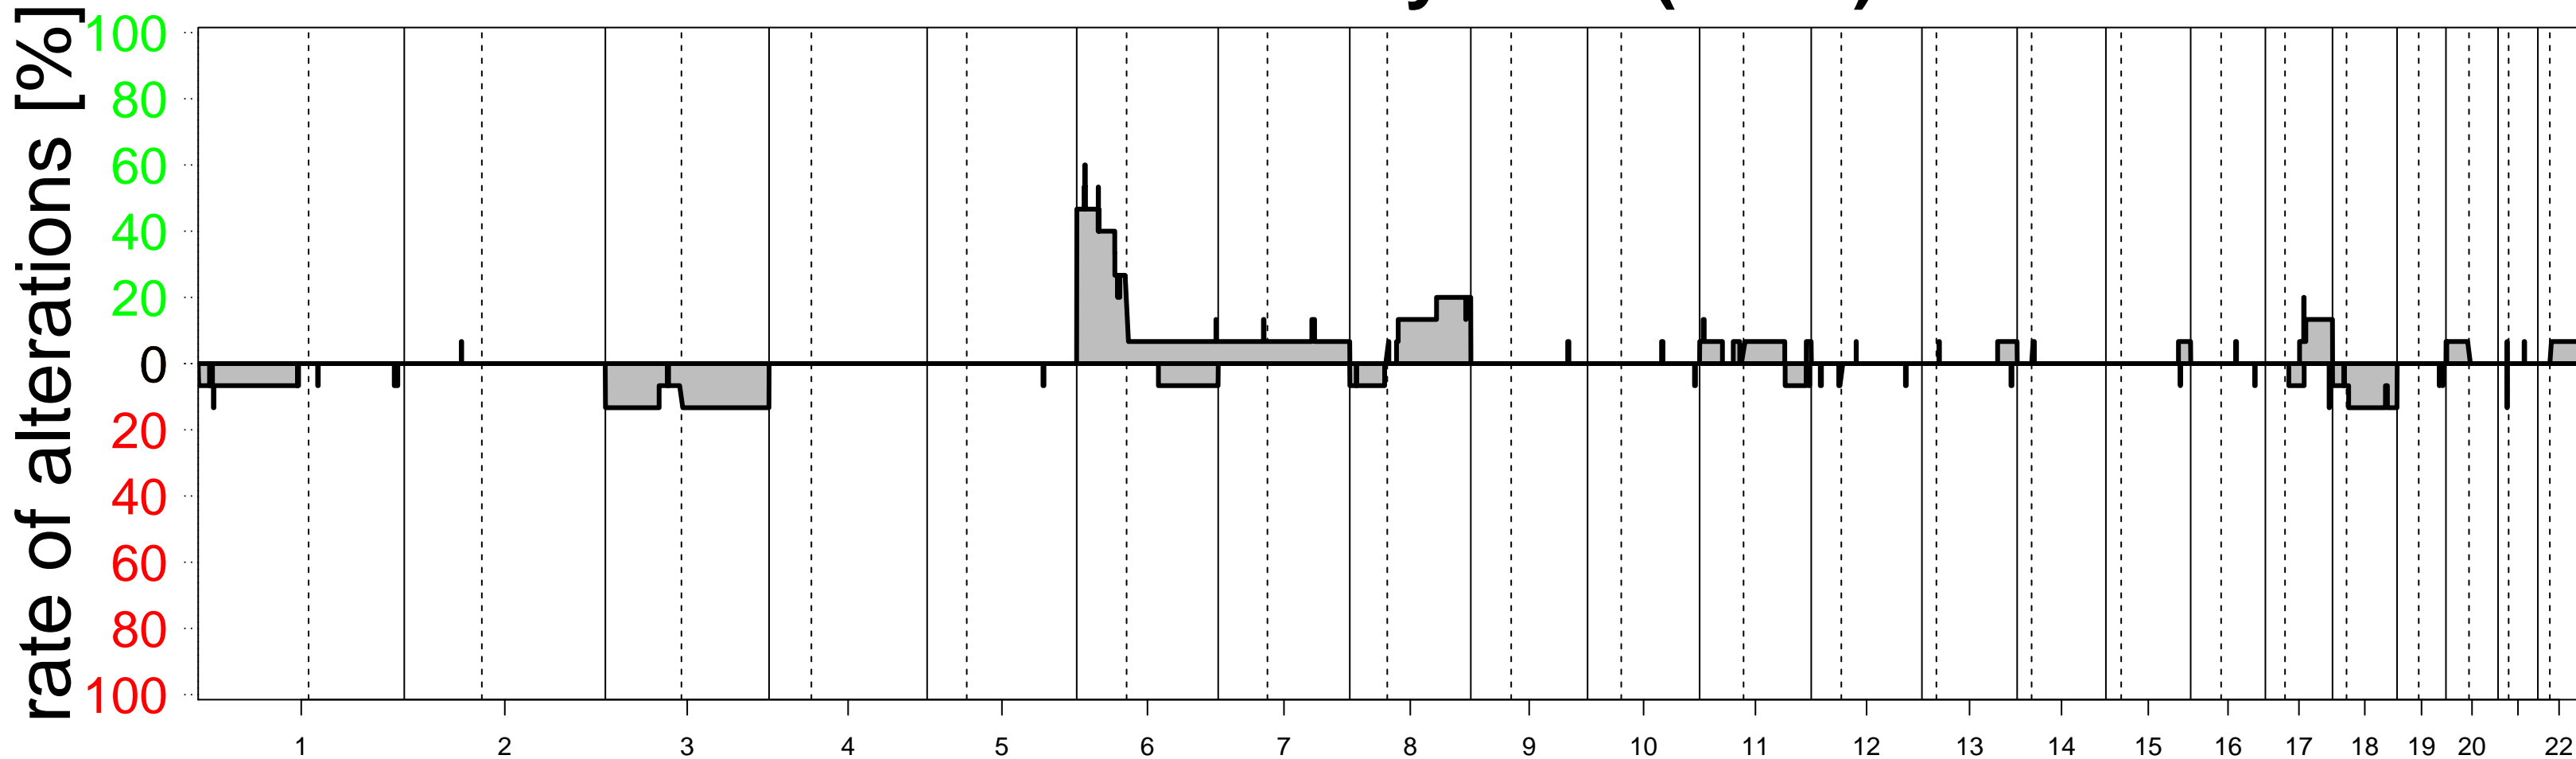

# m. c. melanoma (n=12)

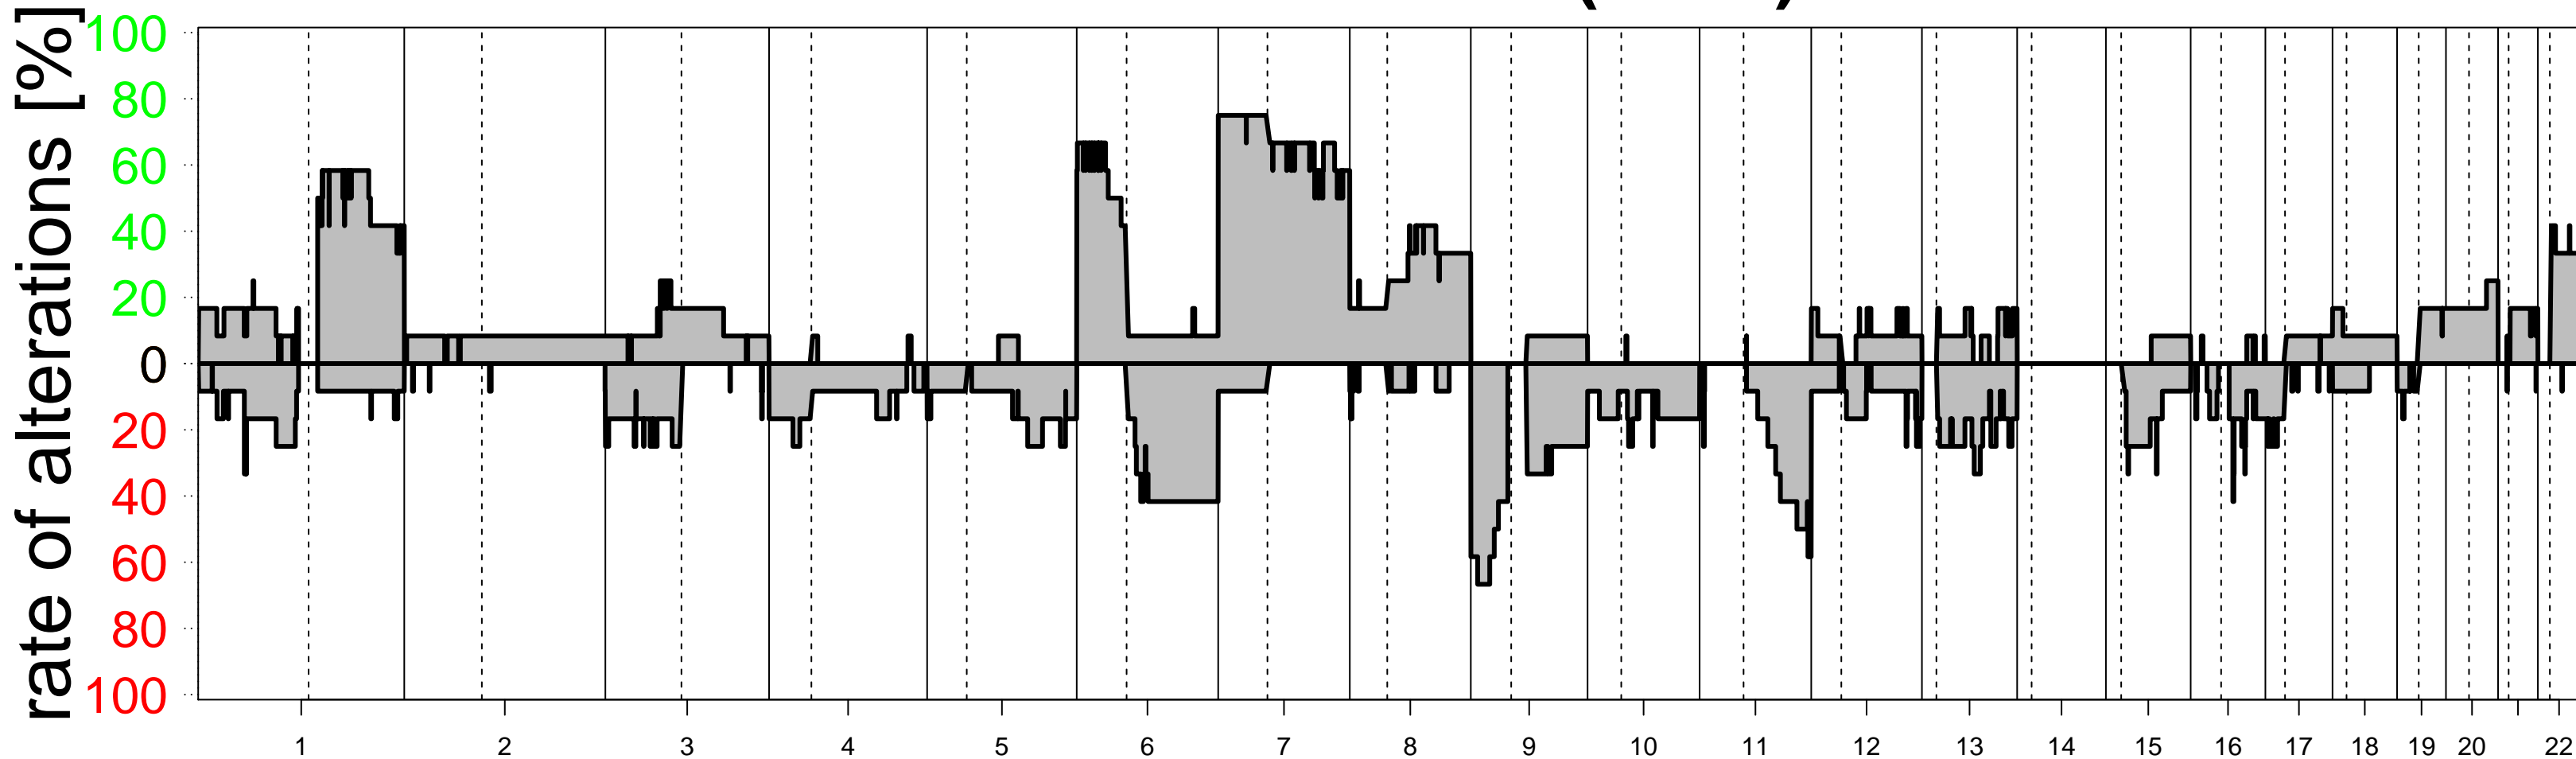



# m. c. melanotic schwannoma (n=8)

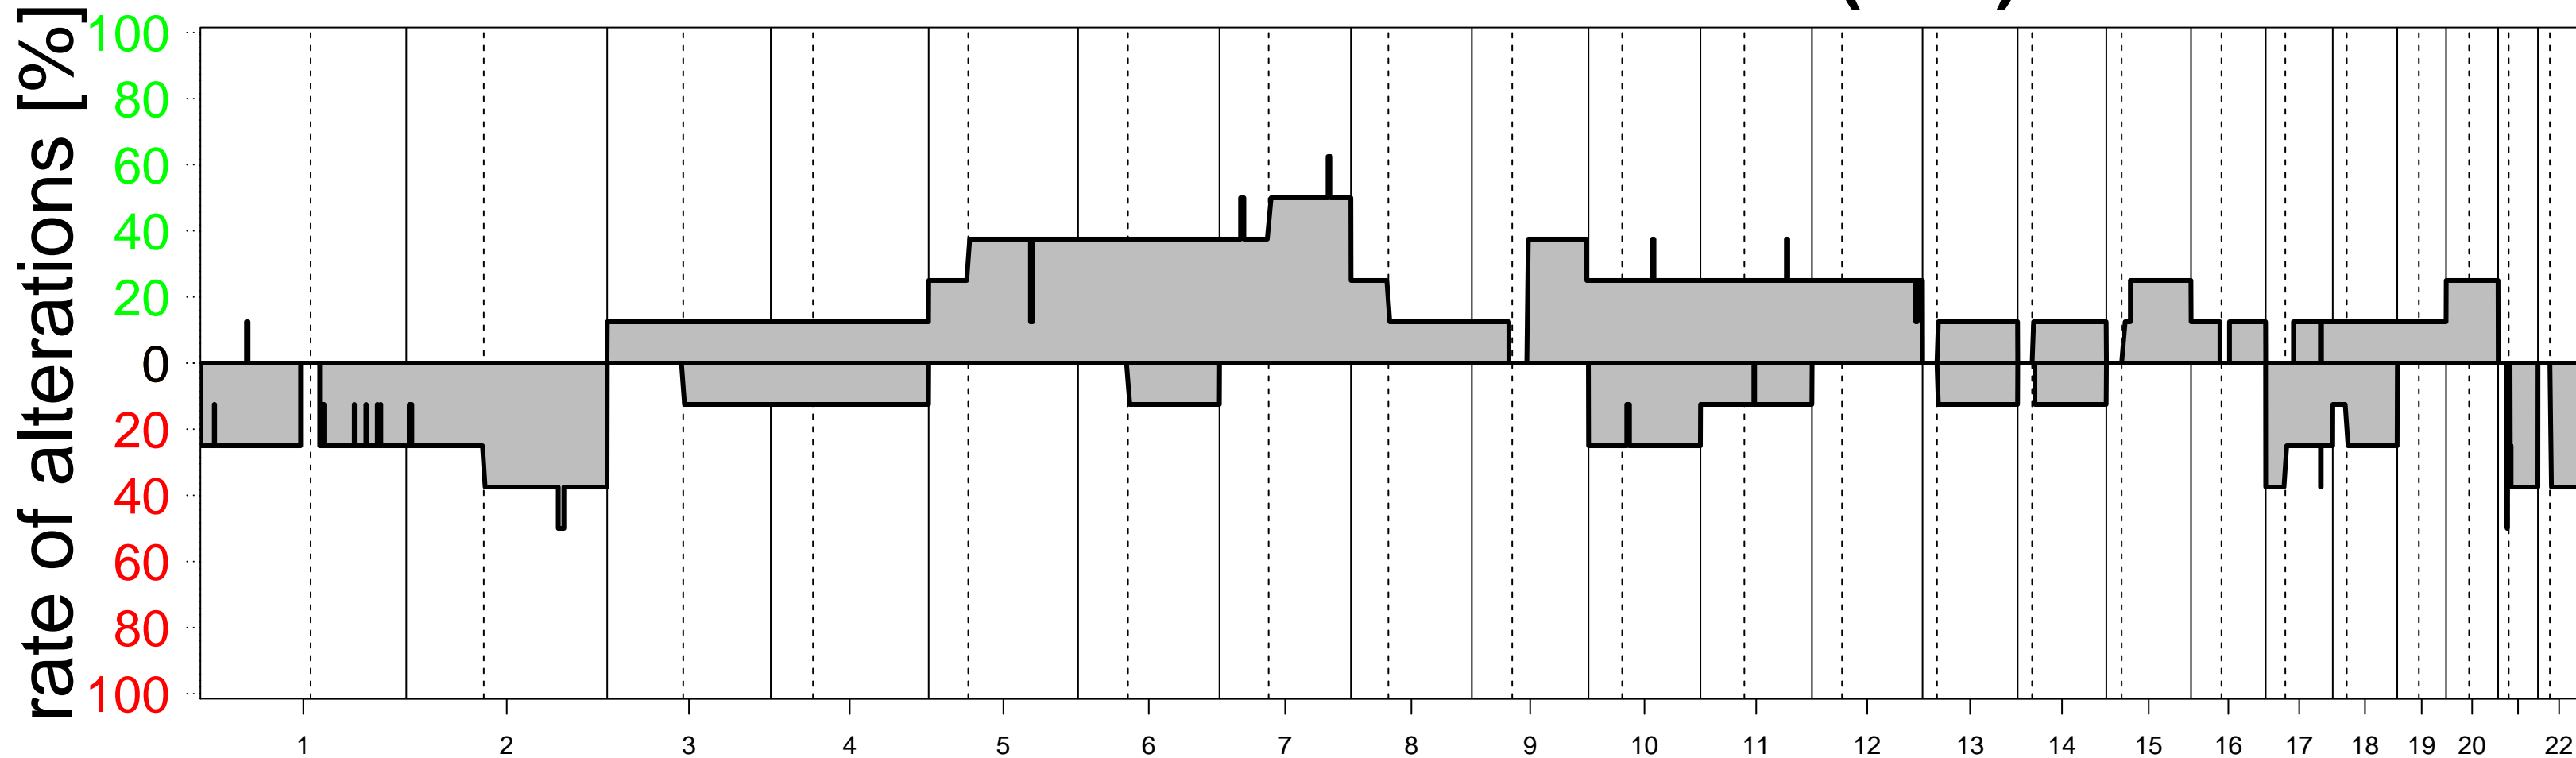

# m. c. meningioma (n=90)

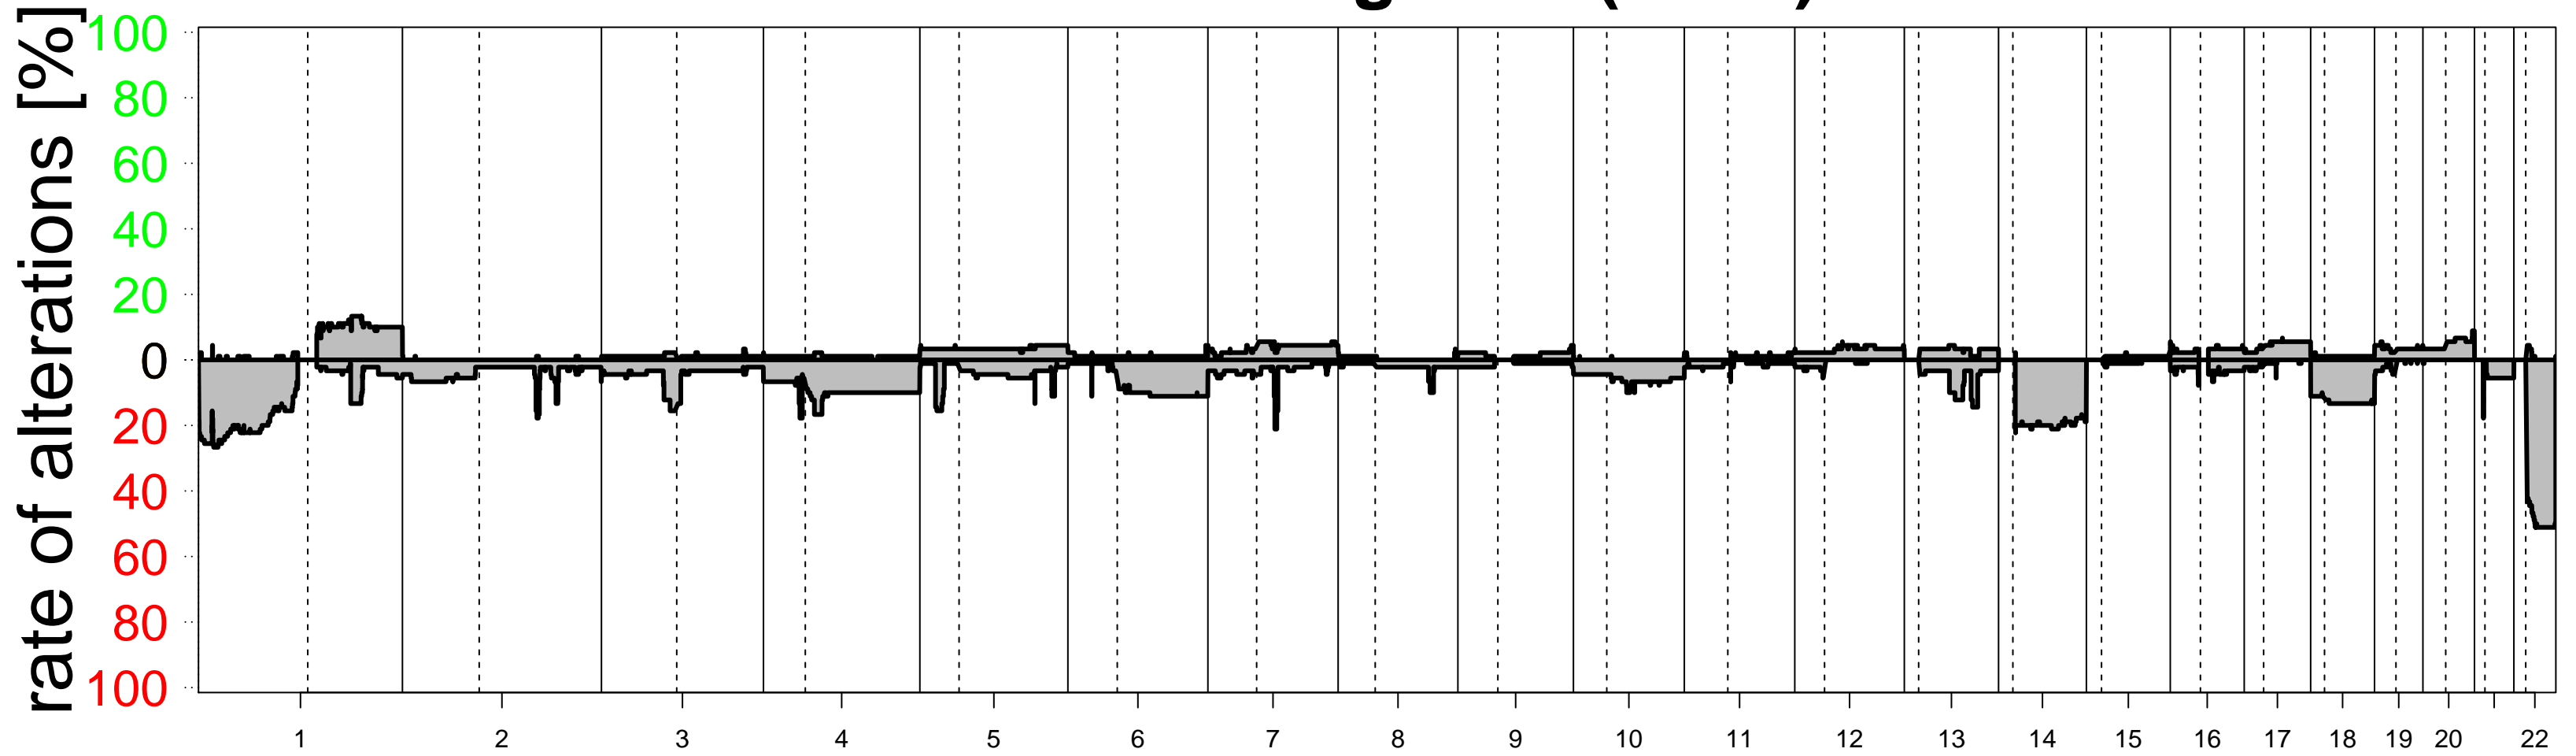

# m. c. papillary tumor of the pineal region group A (n=8)

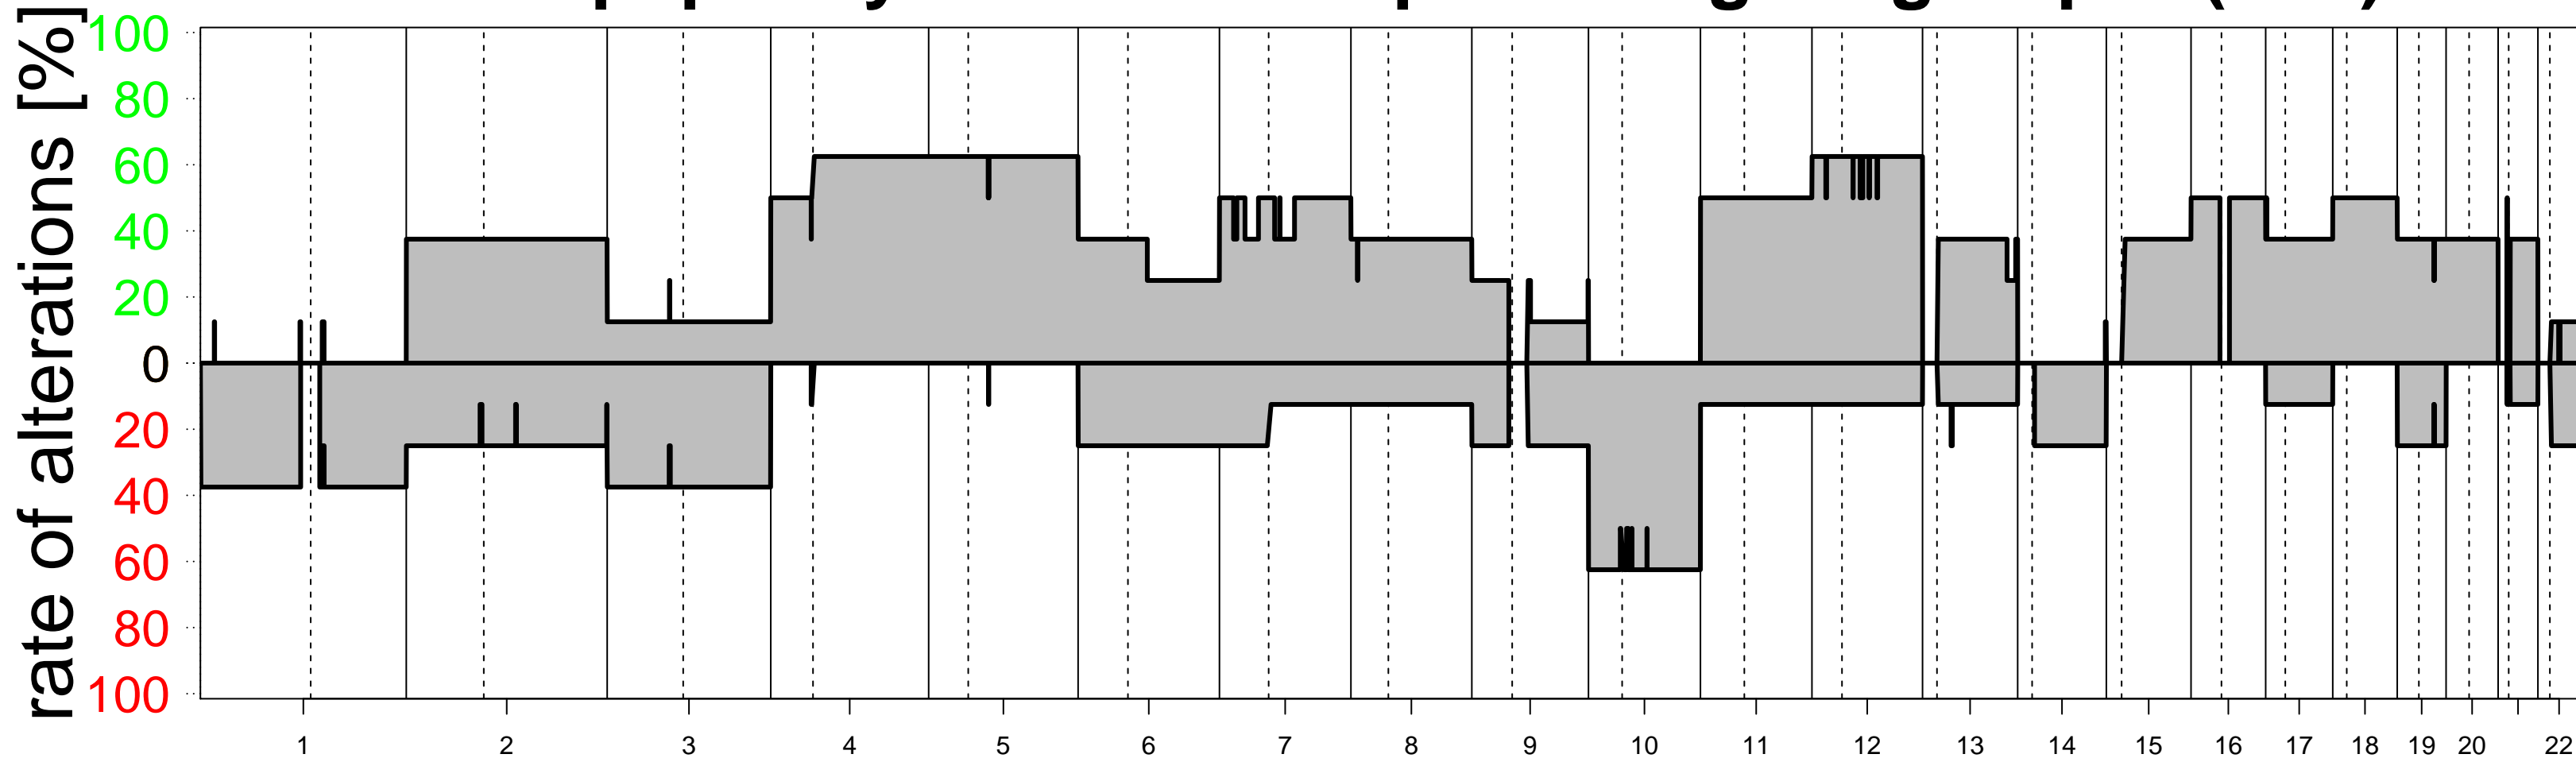

# m. c. papillary tumor of the pineal region group B (n=22)

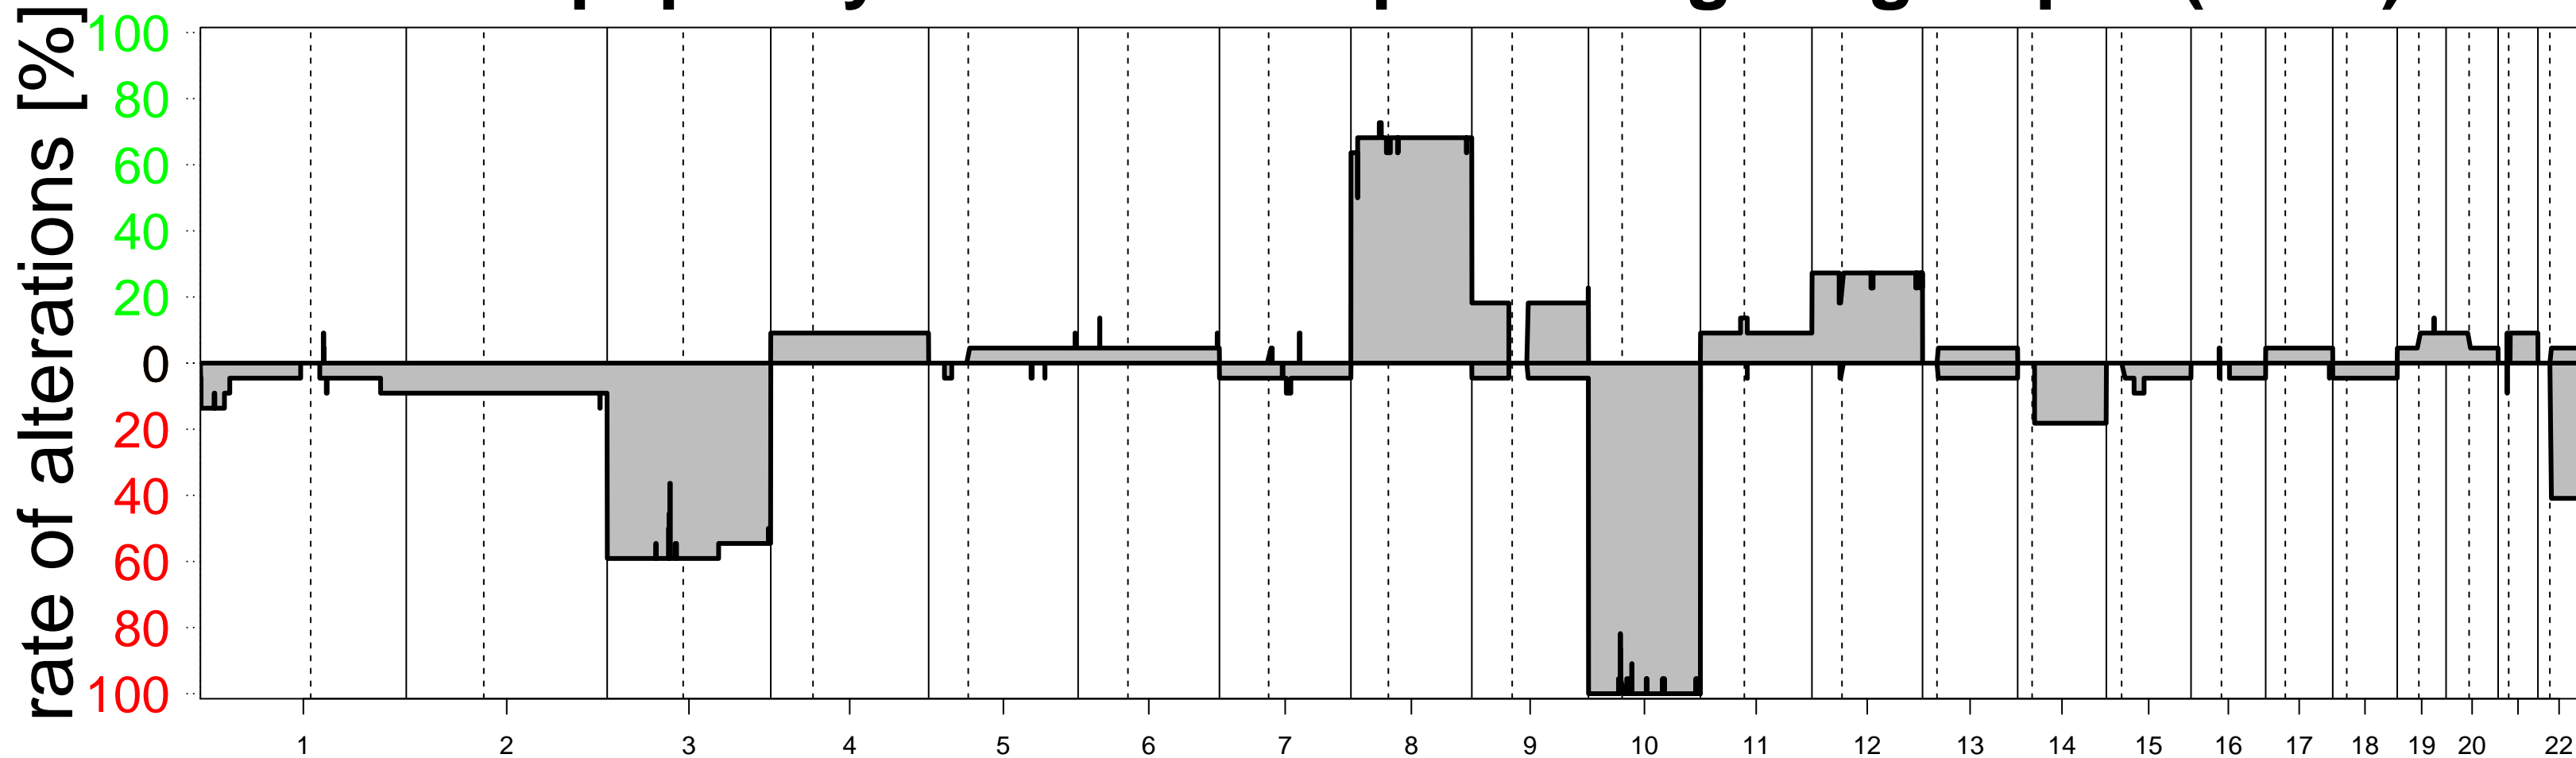

# m. c. paraganglioma, spinal non-CIMP (n=19)

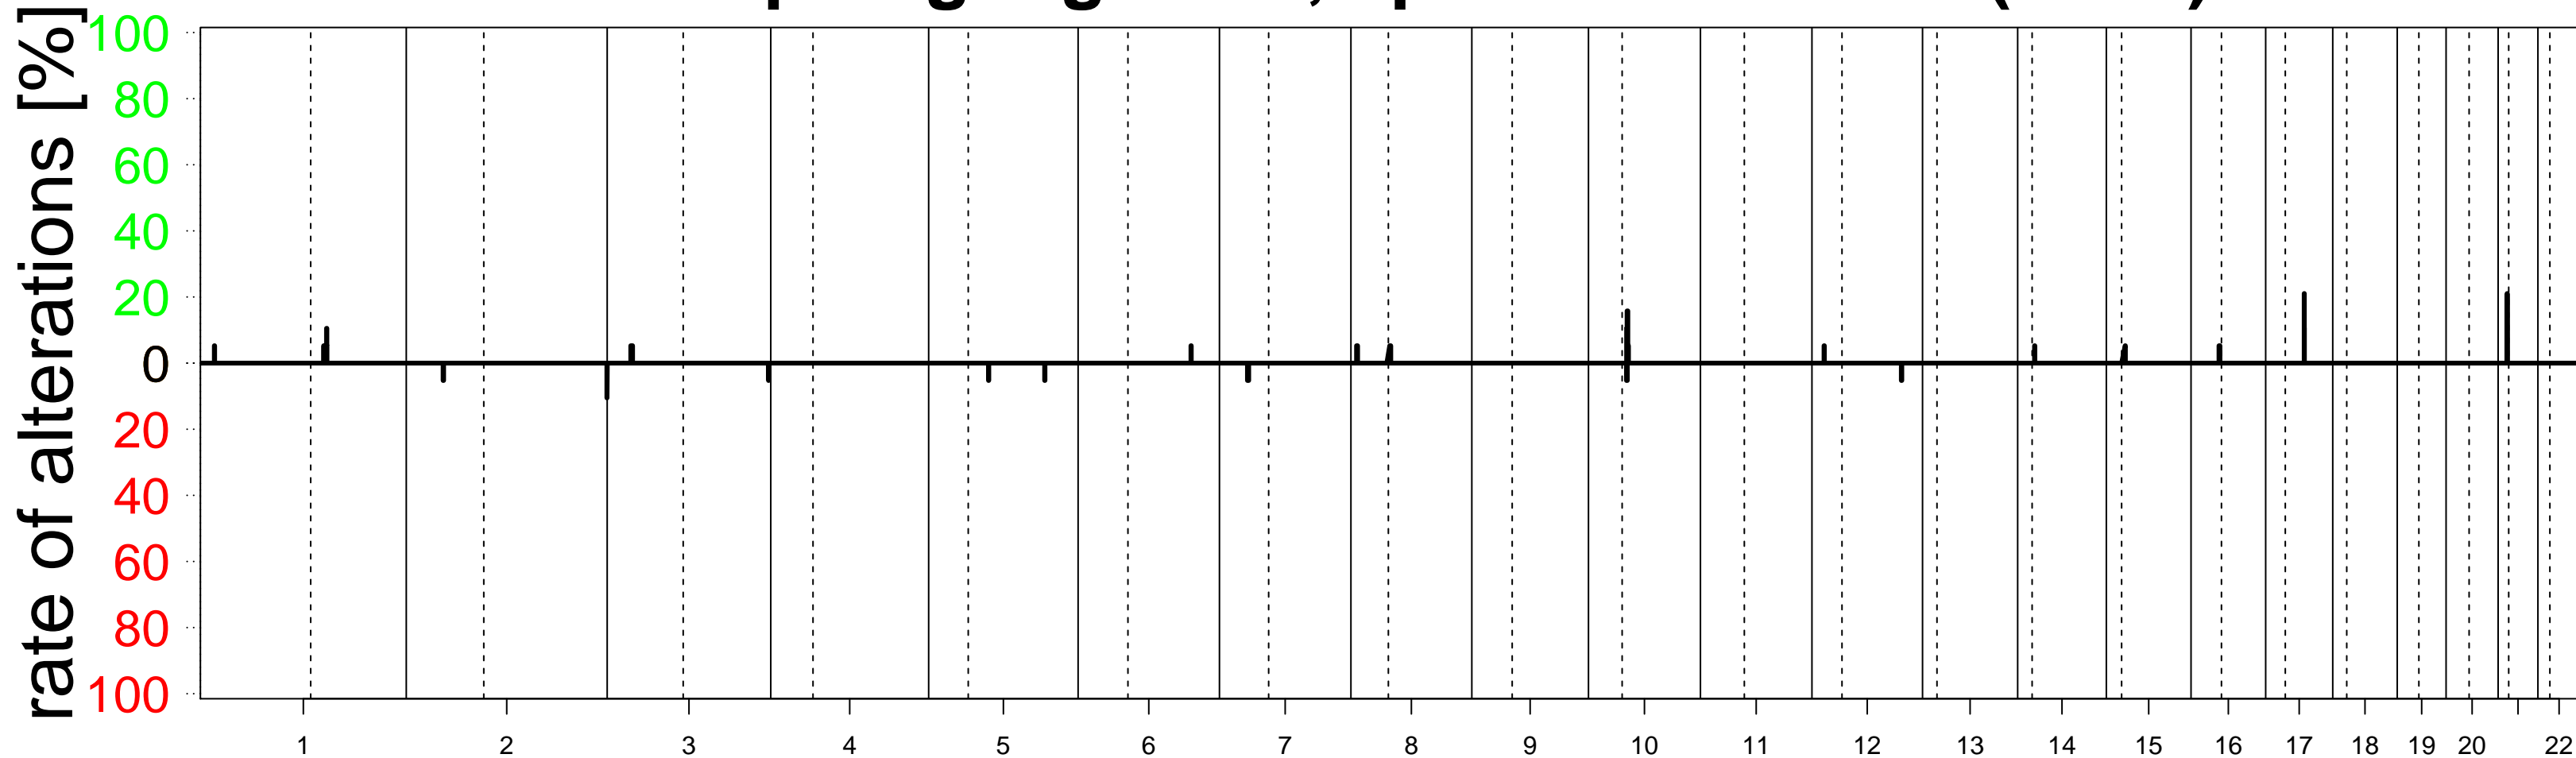

# m. c. pineal parenchymal tumor (n=19)

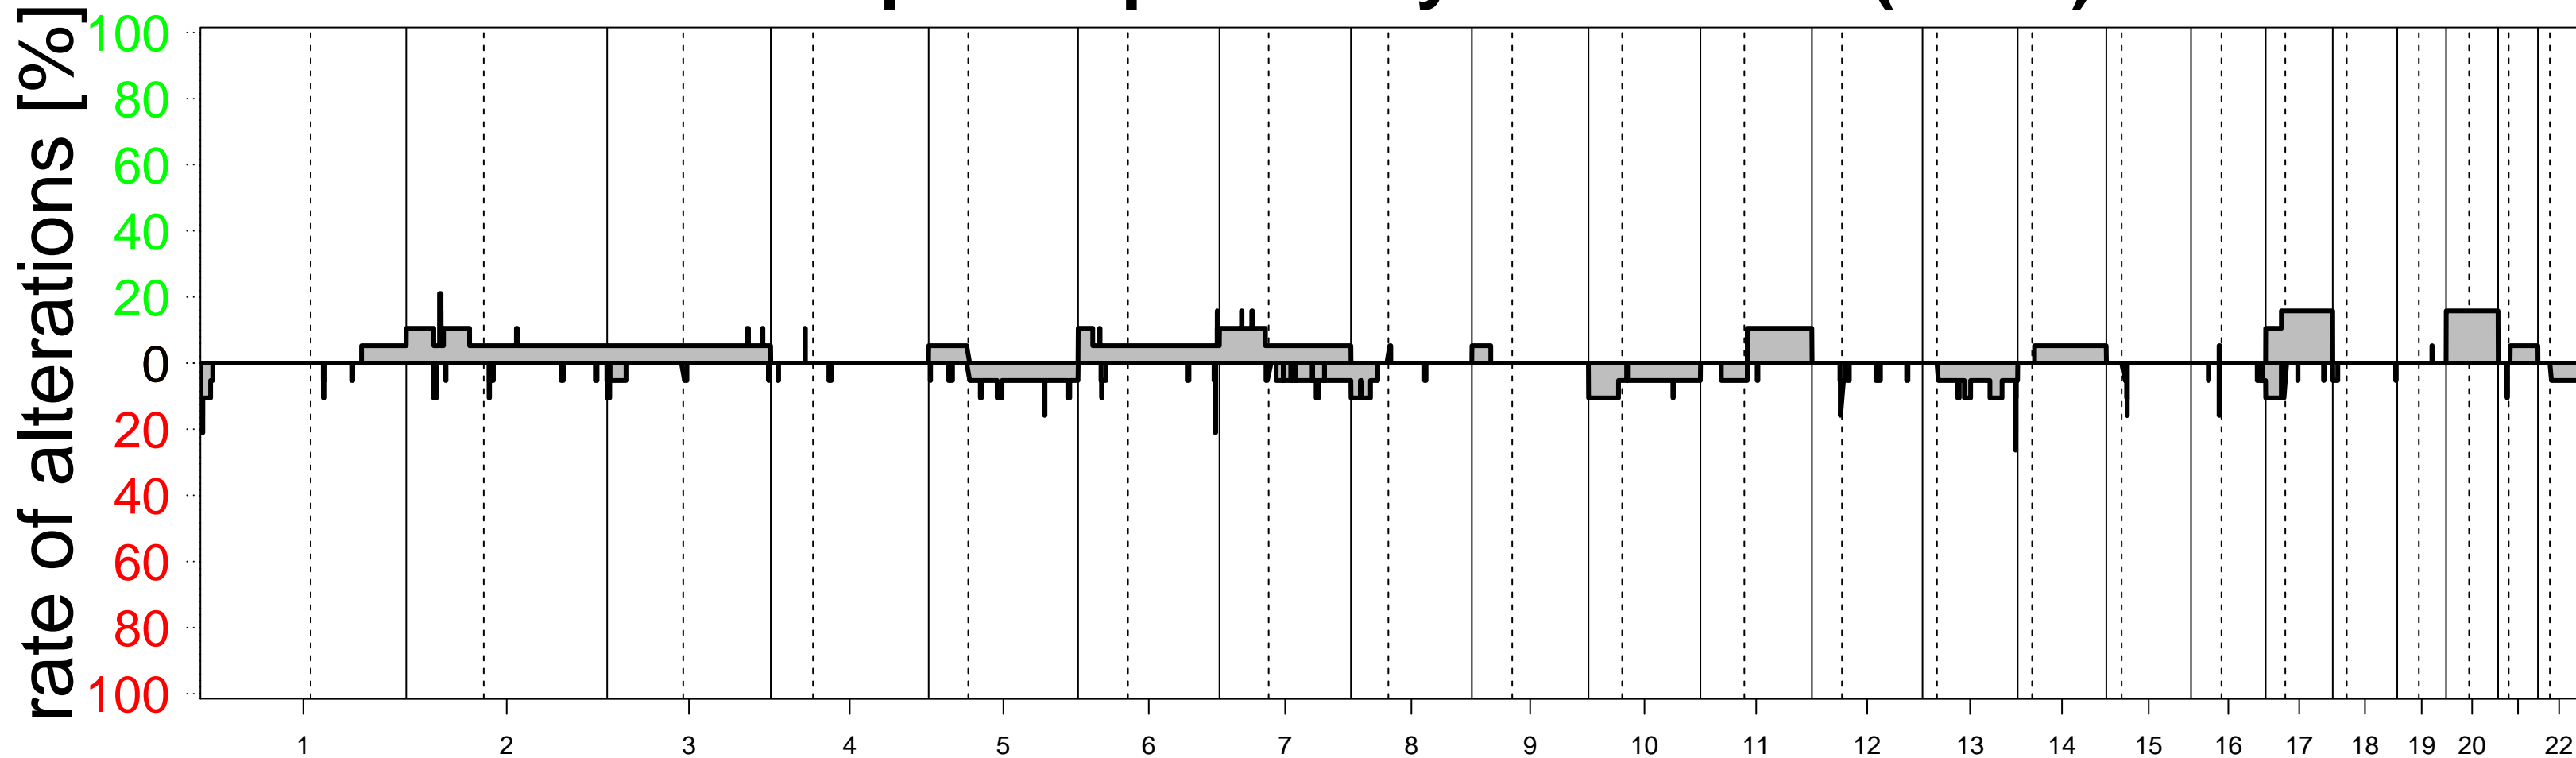

# m. c. pineoblastoma group A – intracranial retinoblastoma (n=9)

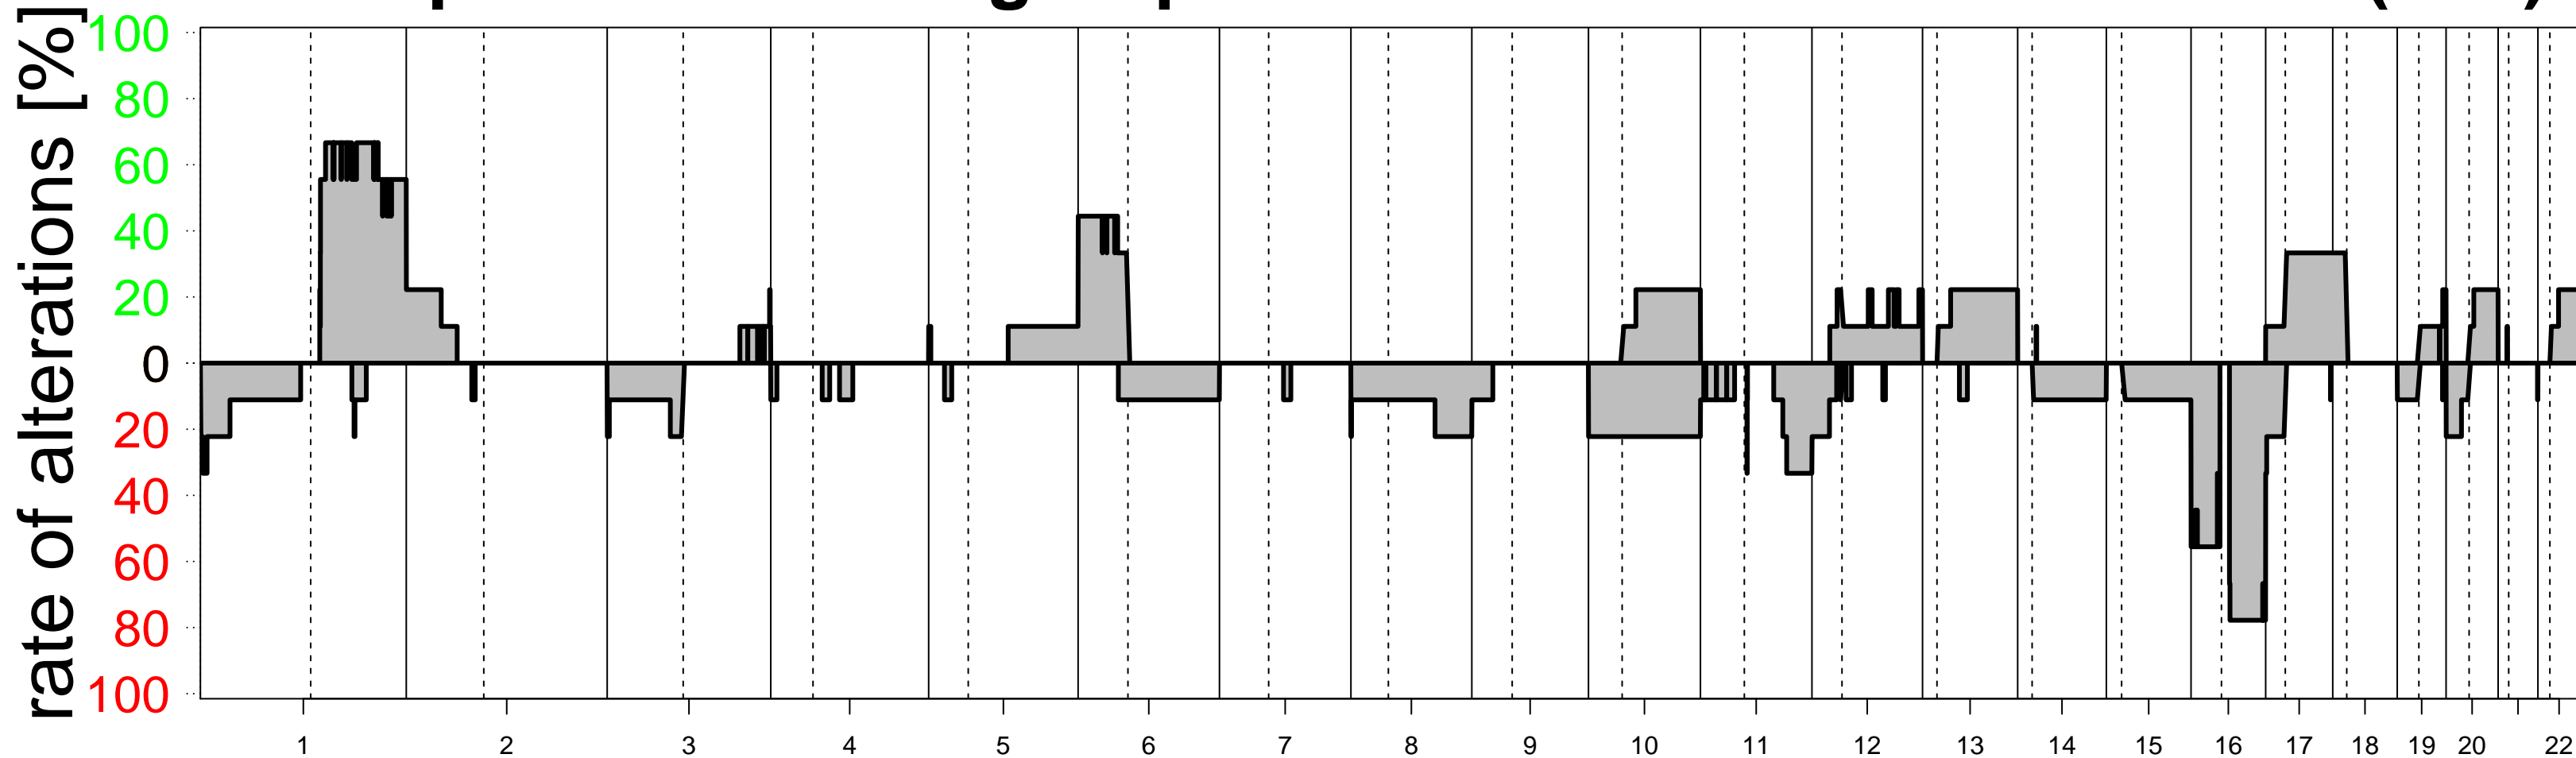

# m. c. pineoblastoma group B (n=22)

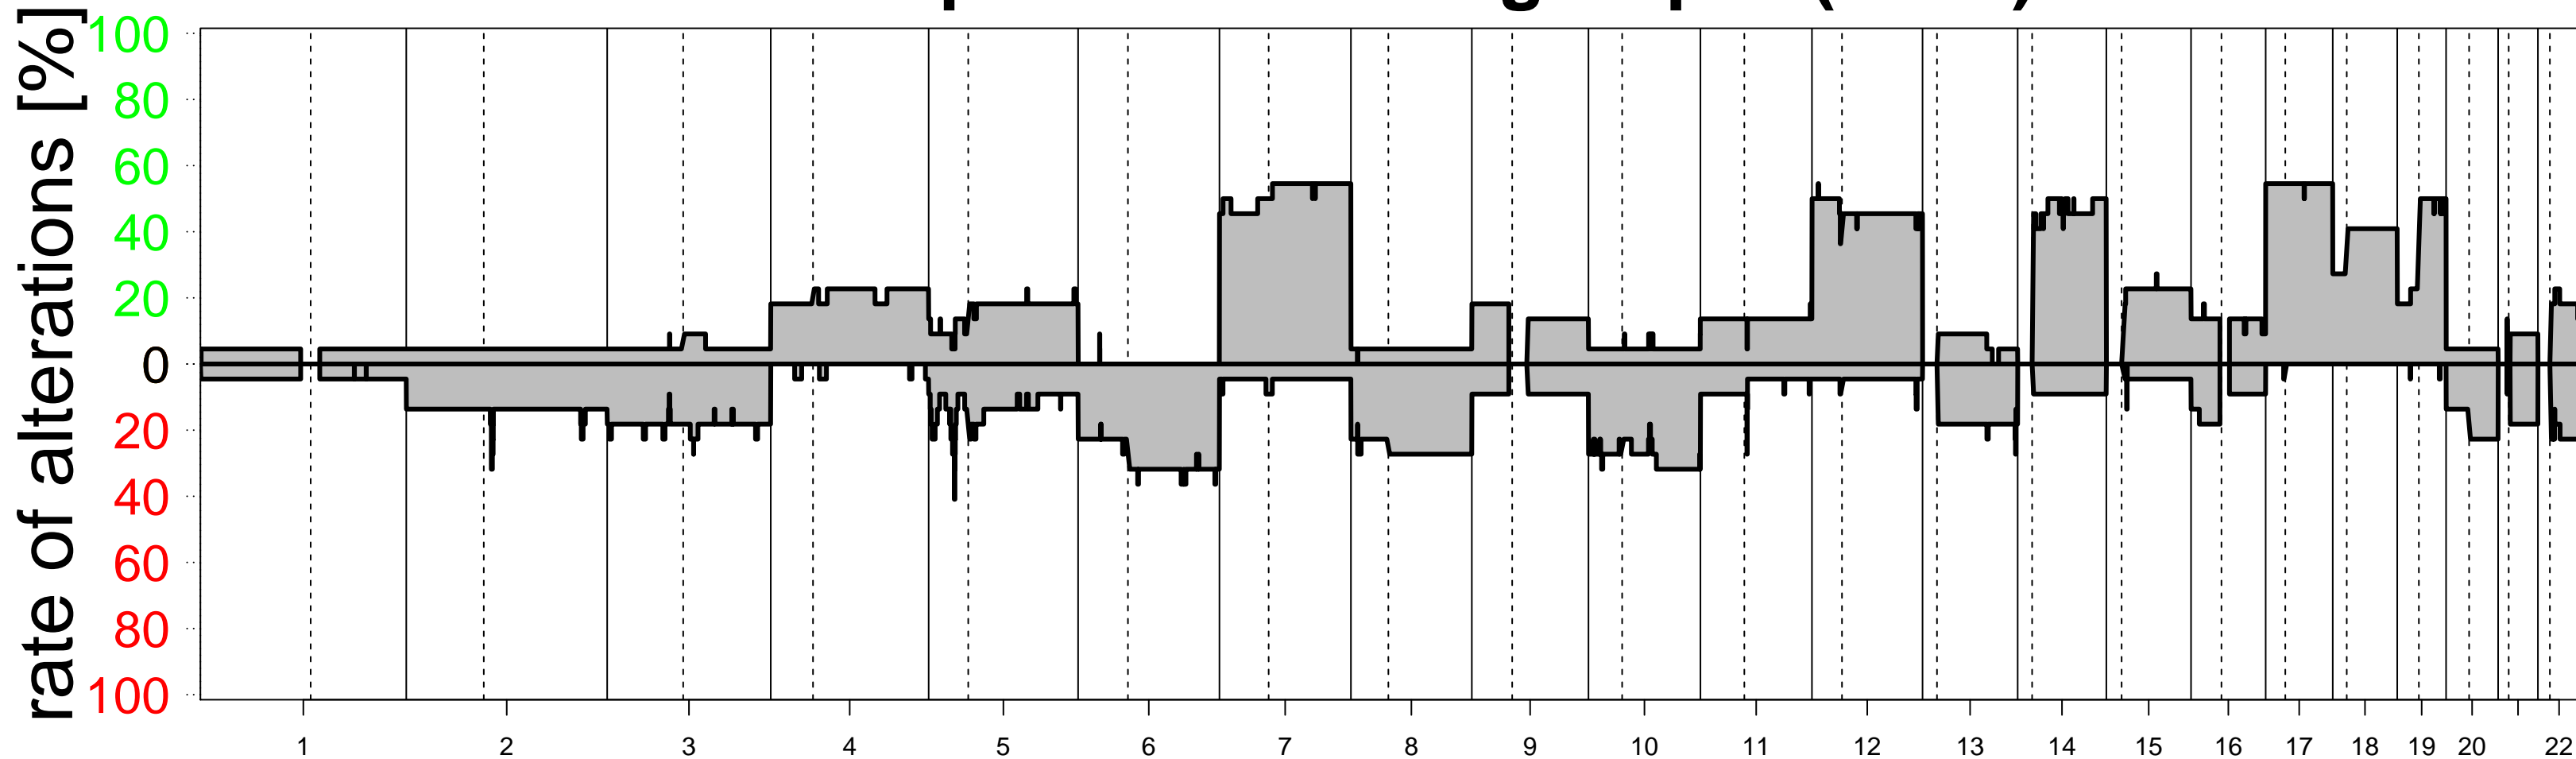



# m. c. pituicytoma – granular cell tumor – spindle cell oncocytoma (n=29)

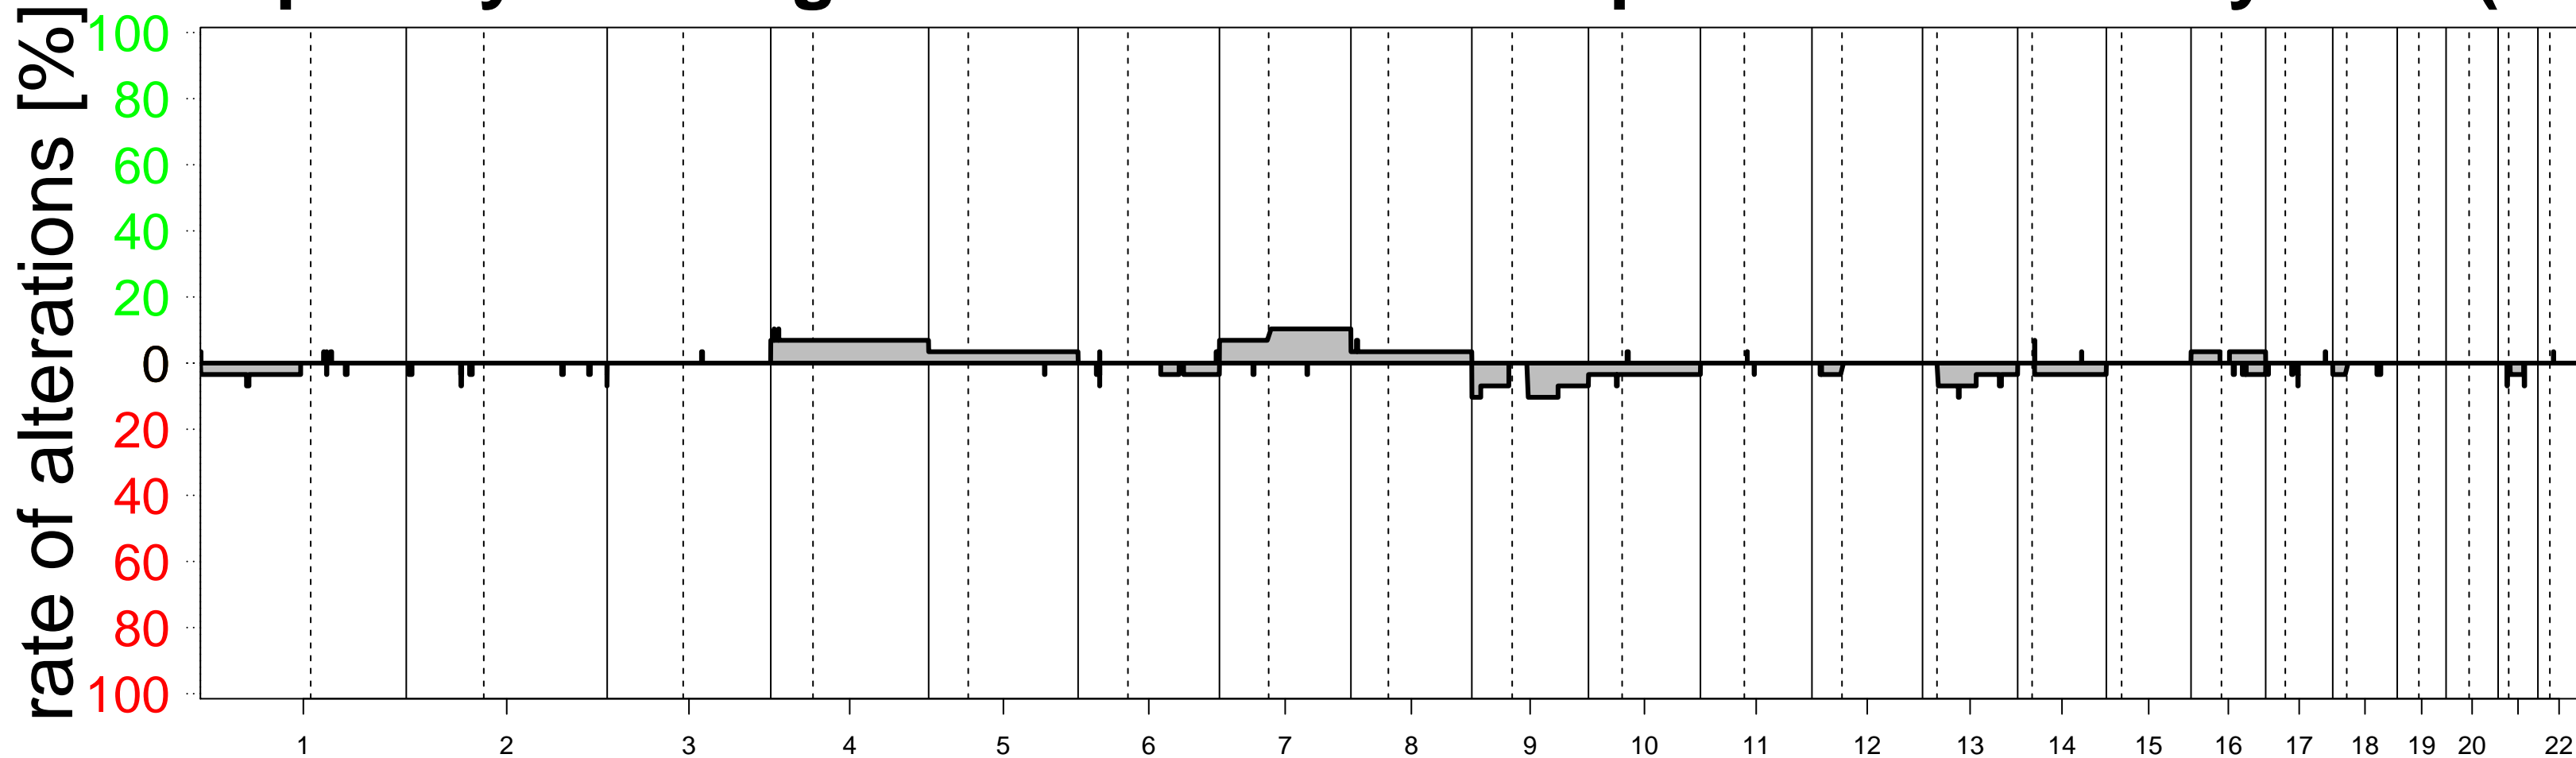

# m. c. pituitary adenoma, ACTH (n=18)

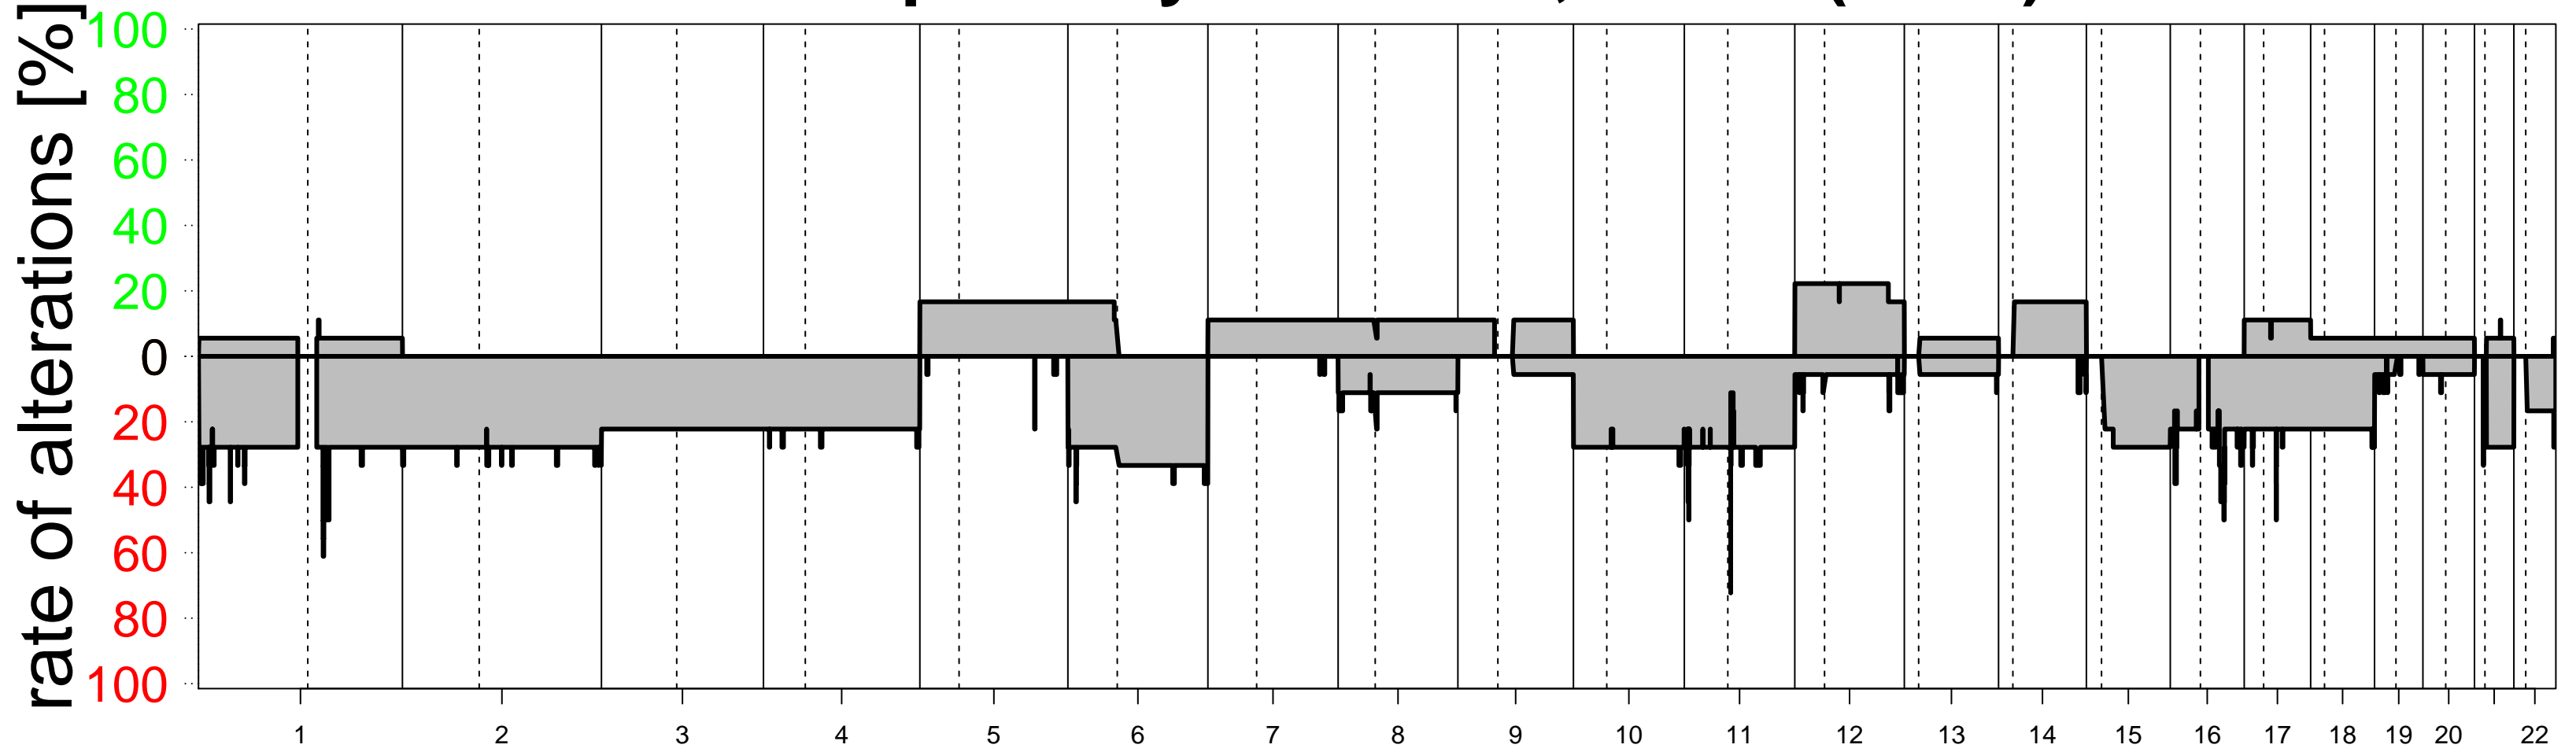

# m. c. pituitary adenoma, FSH-LH (n=21)

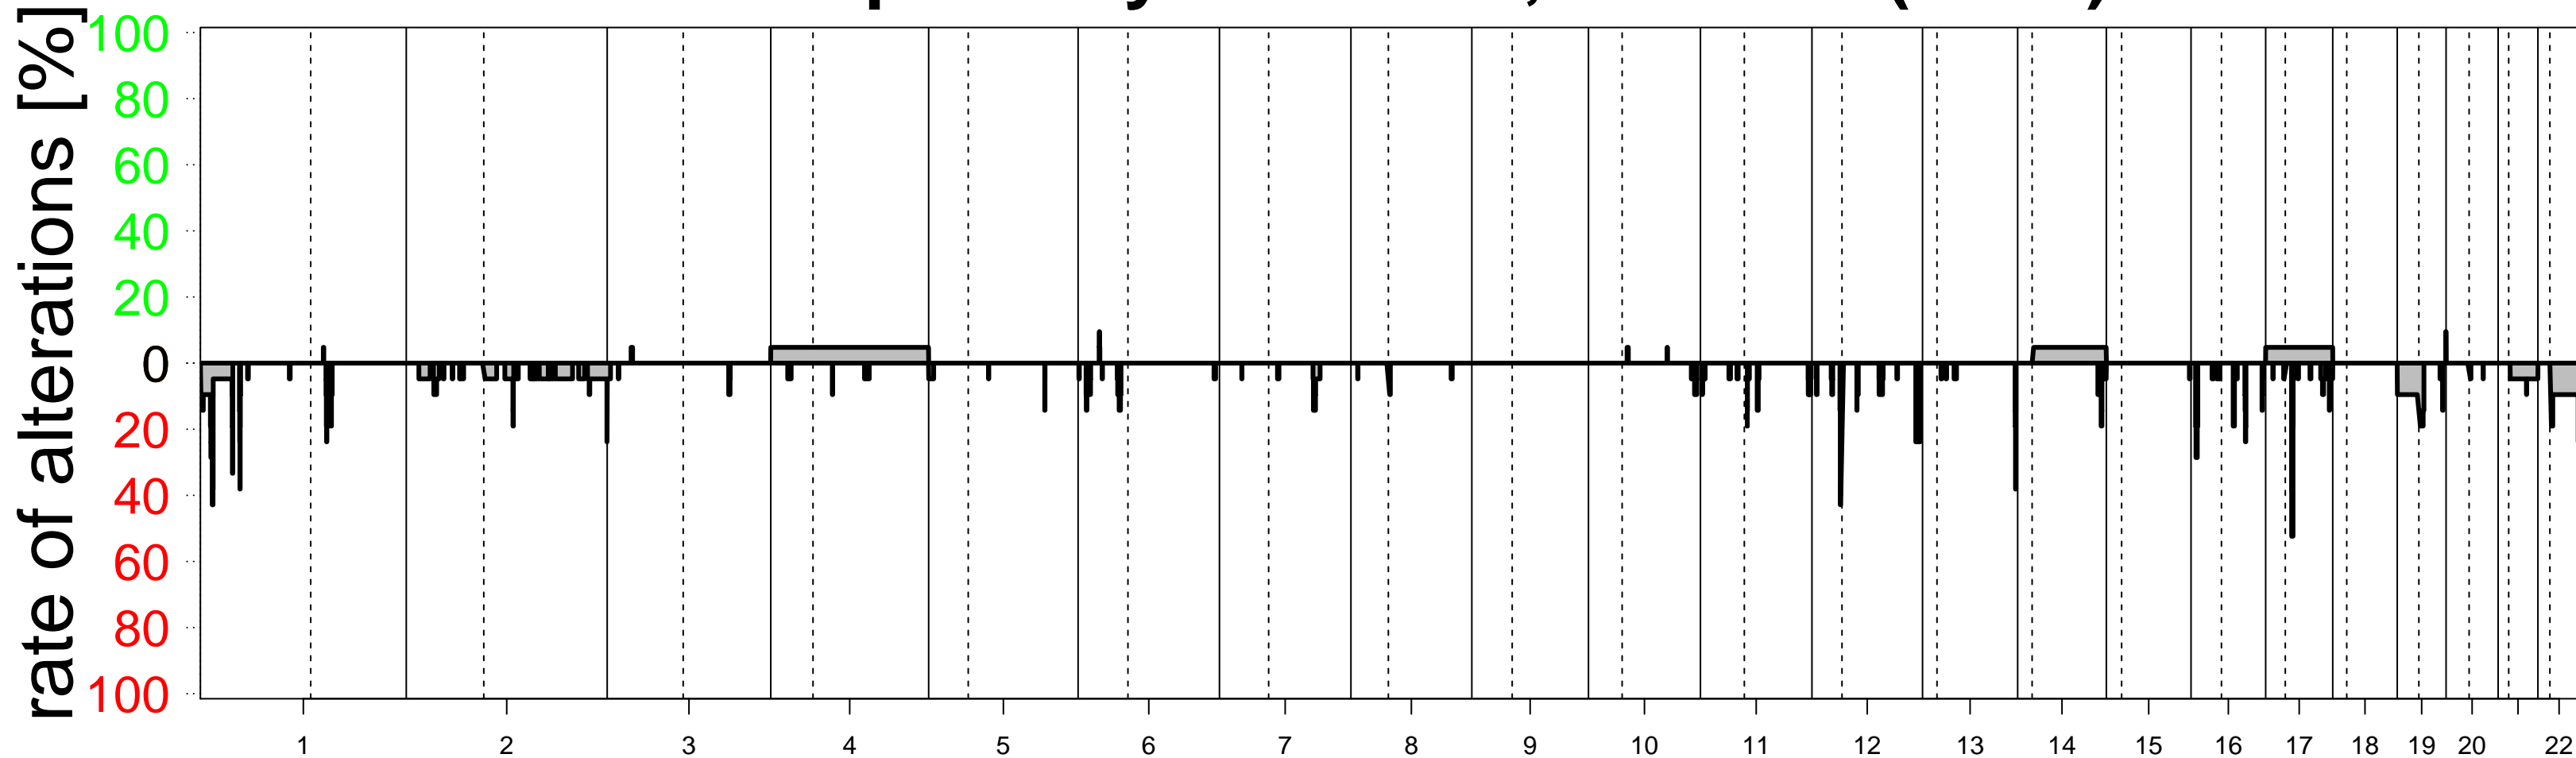

# m. c. pituitary adenoma, prolactin (n=8)

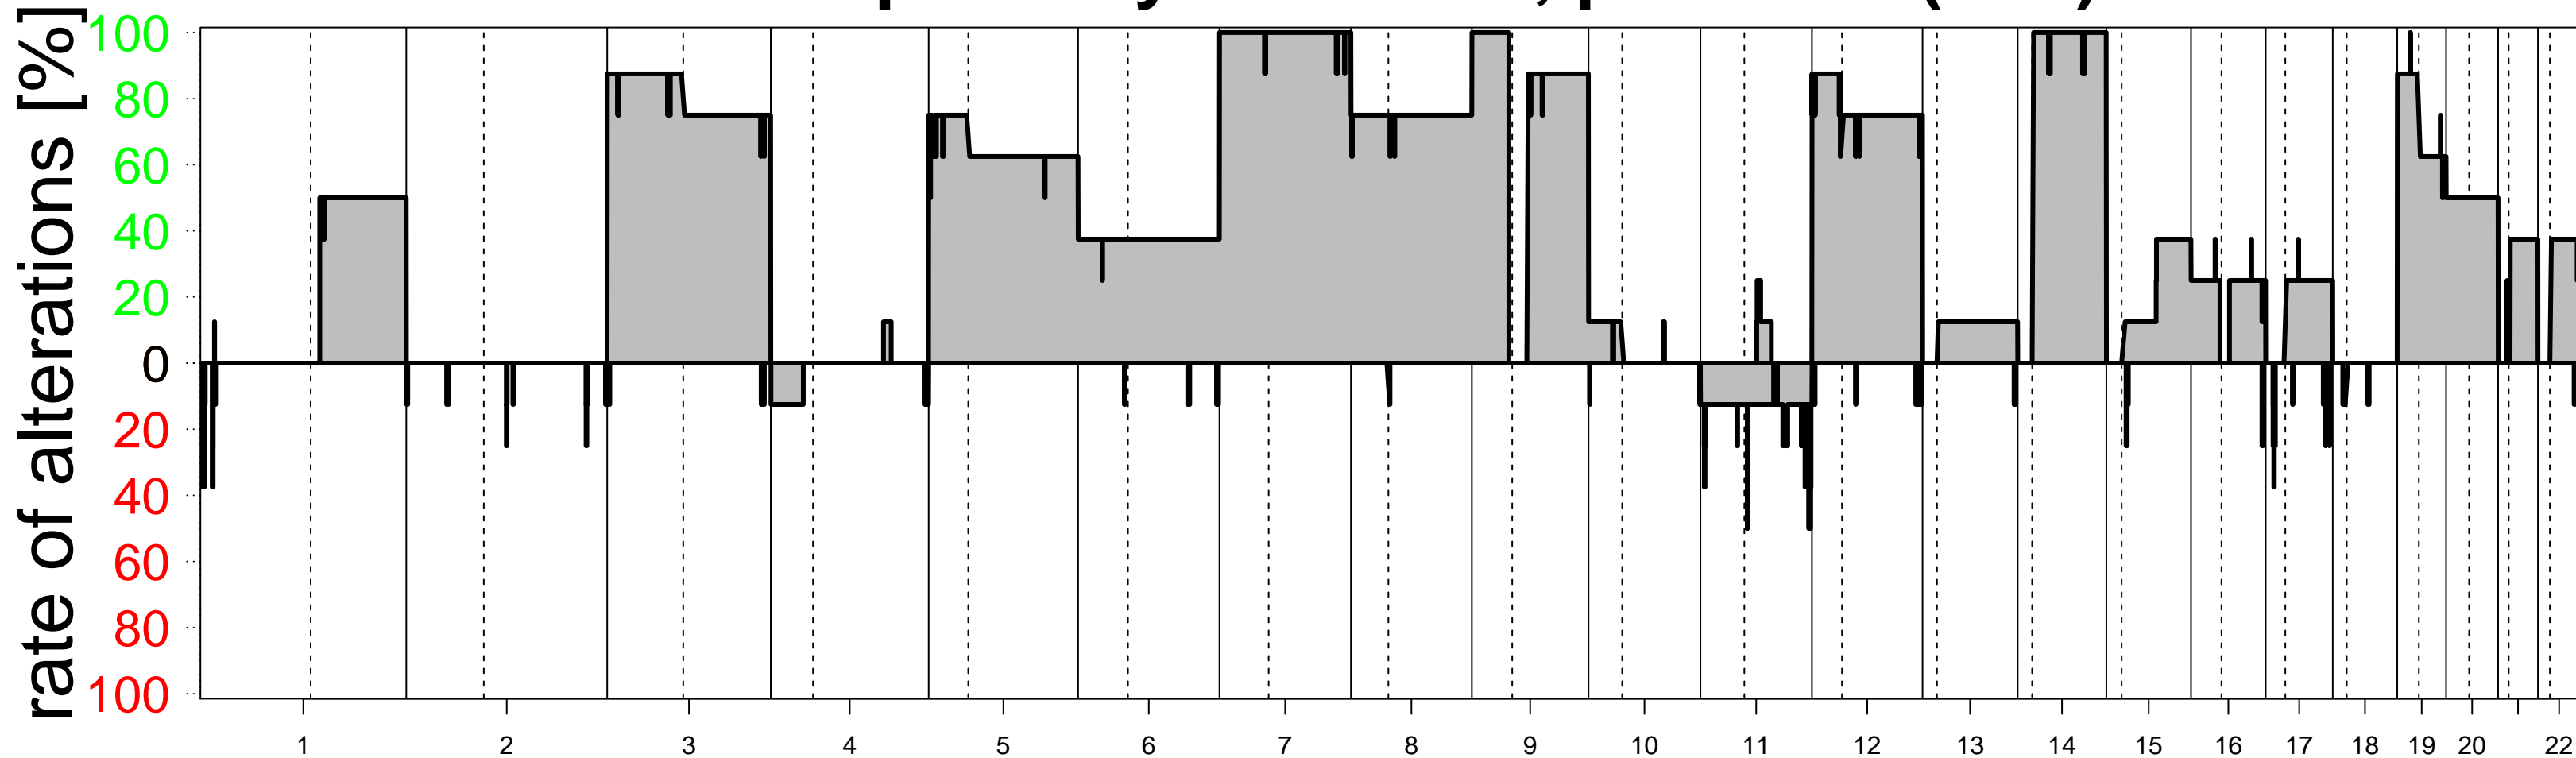

# m. c. pituitary adenoma, STH densely granulated, group A (n=9)

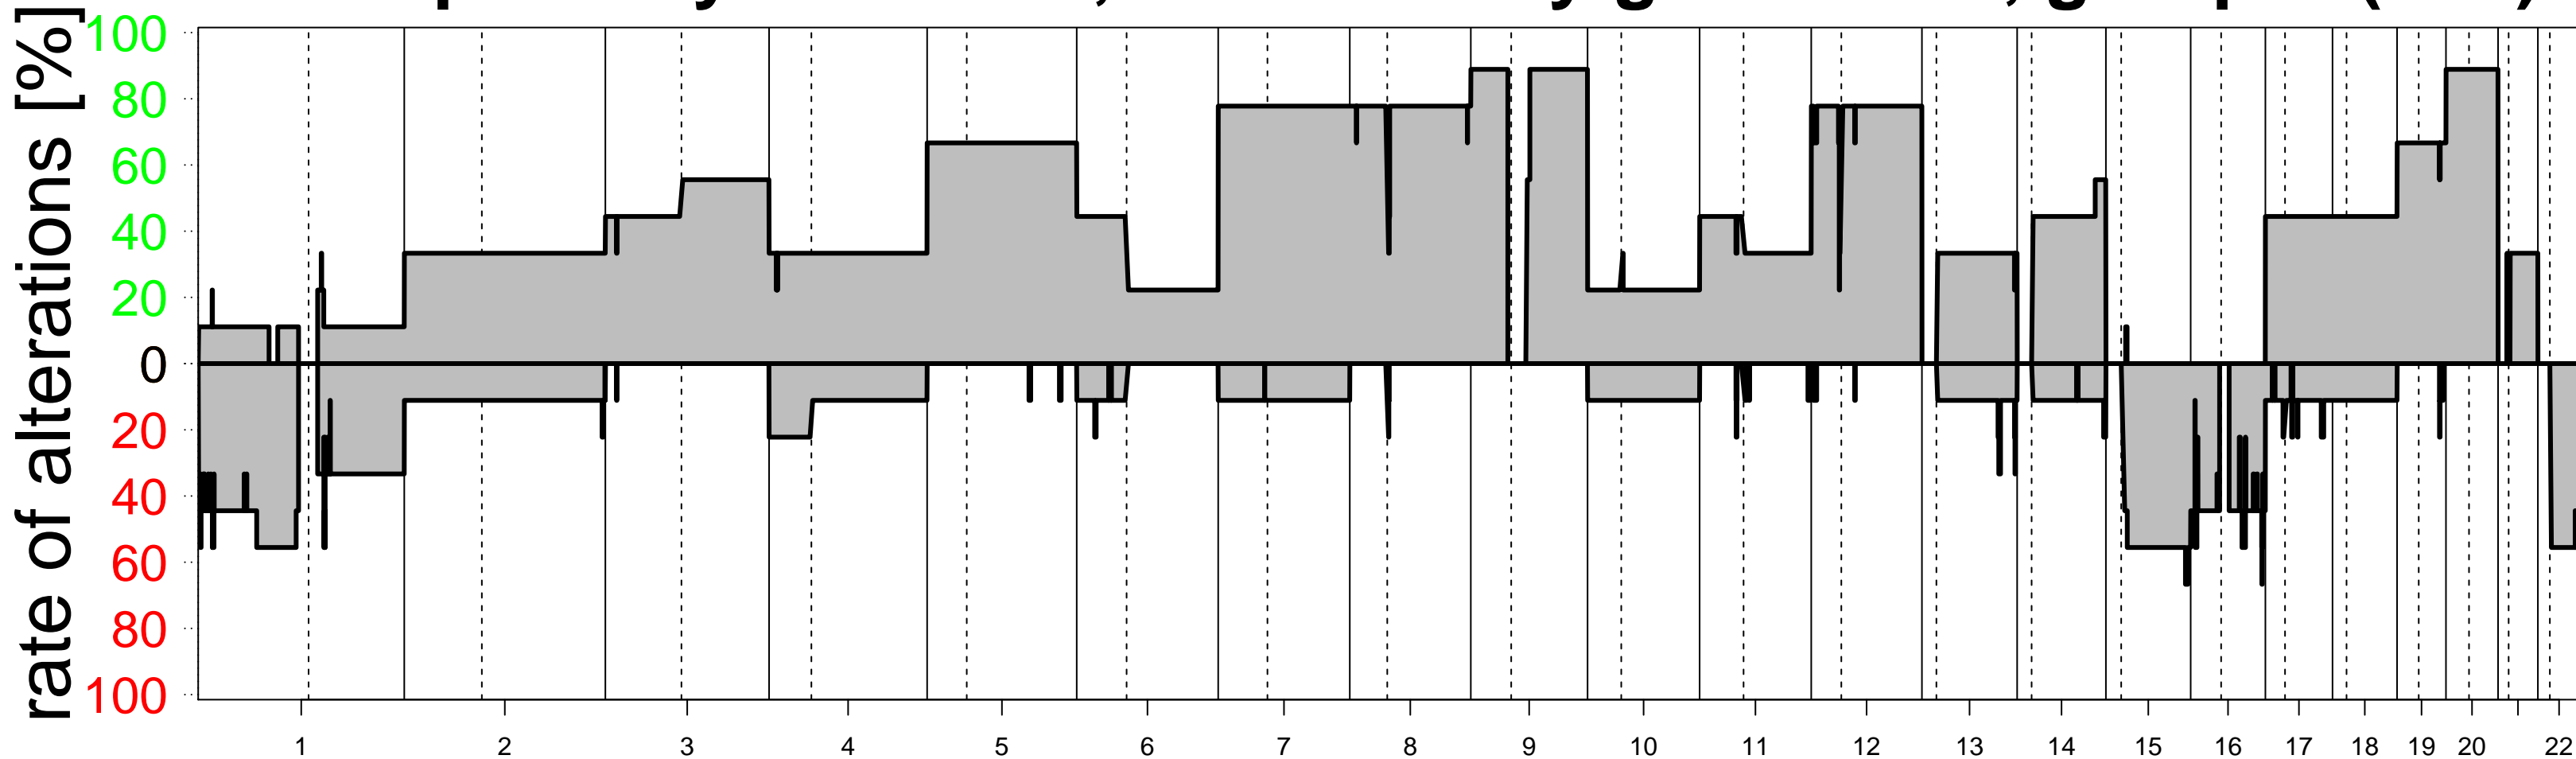

# m. c. pituitary adenoma, STH densely granulated, group B (n=12)

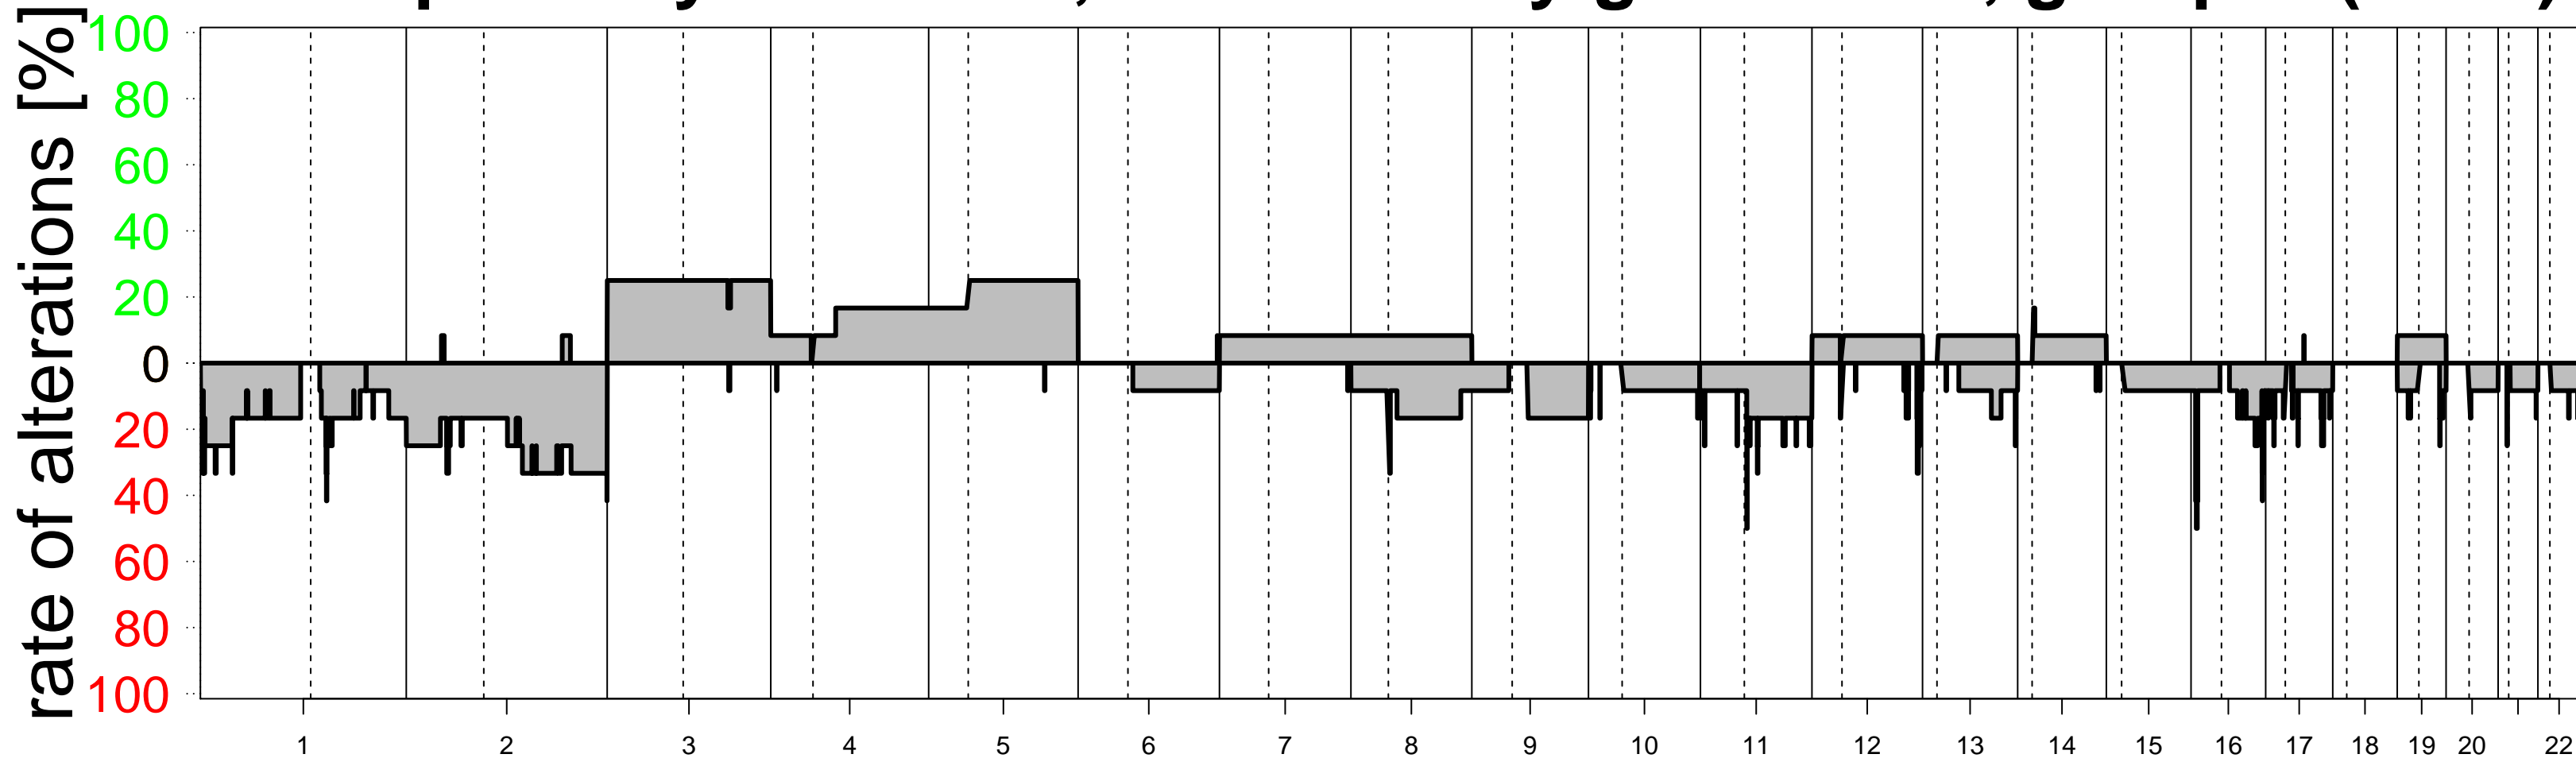

# m. c. pituitary adenoma, STH sparsely granulated (n=17)

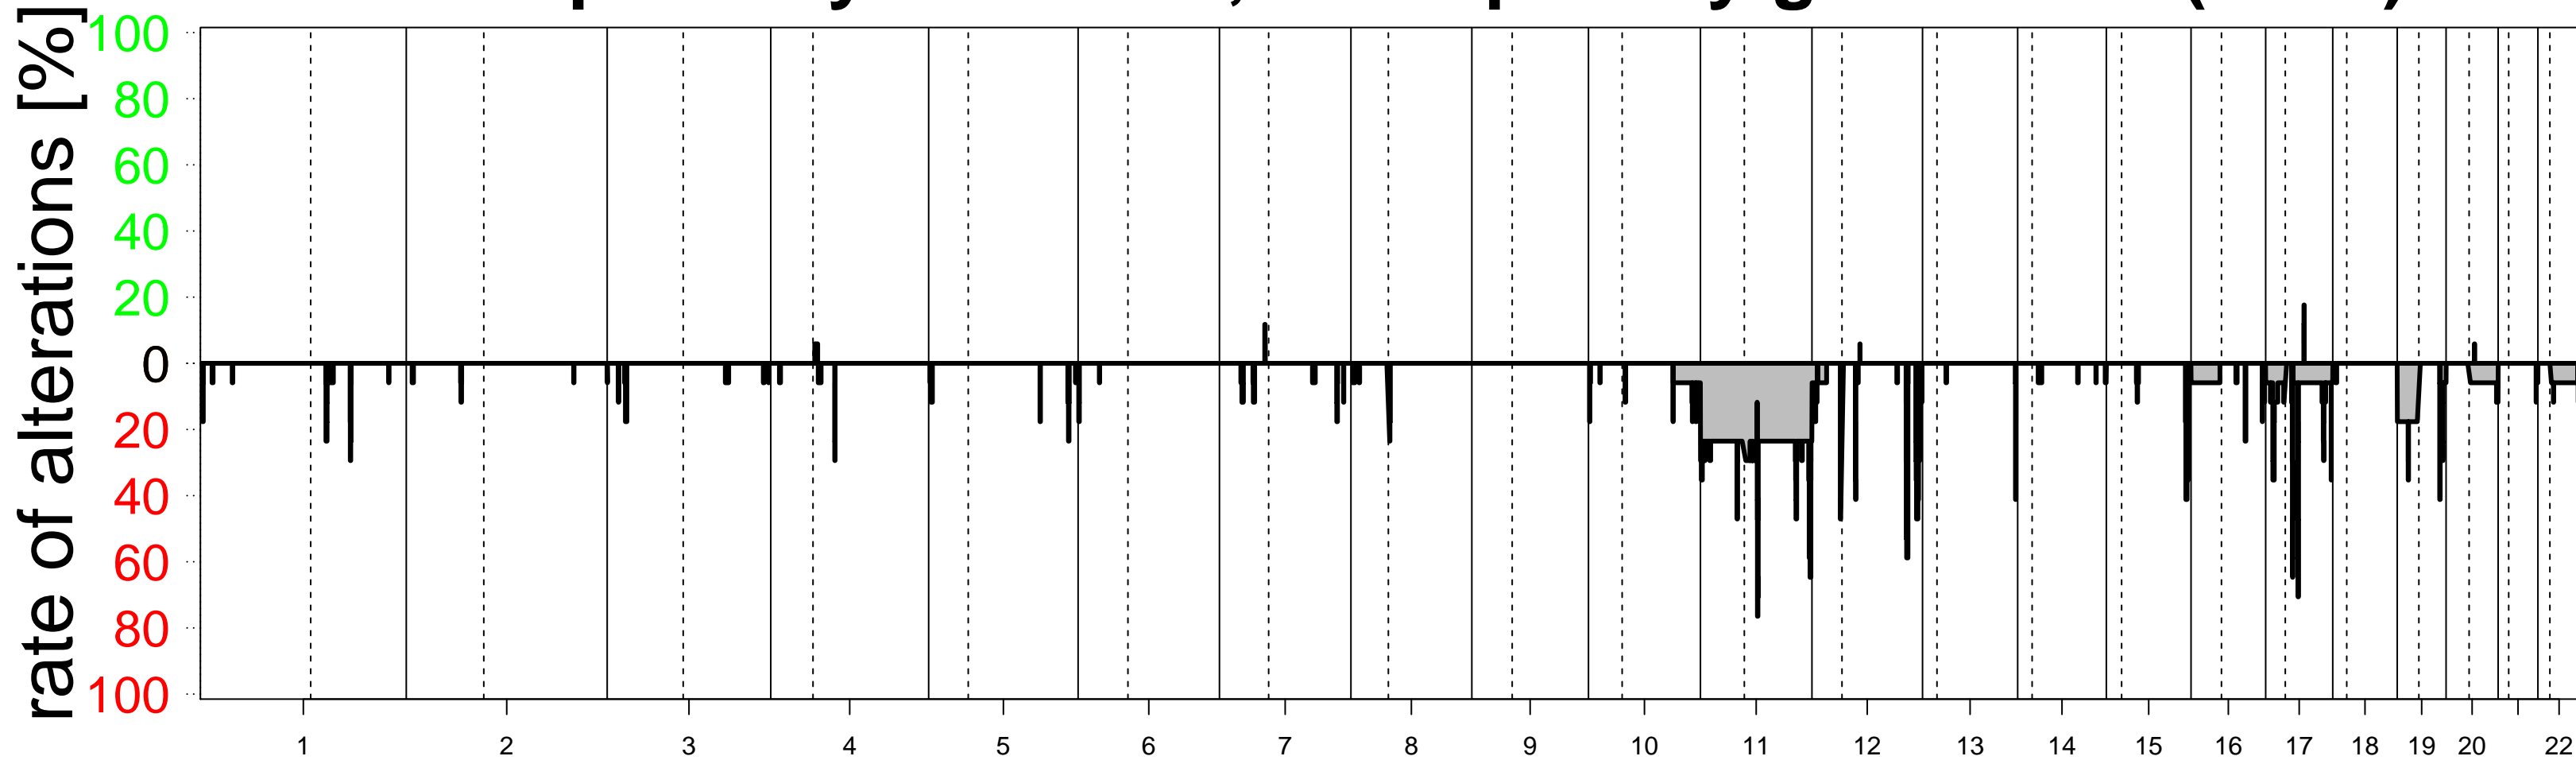

# m. c. pituitary adenoma, TSH (n=10)

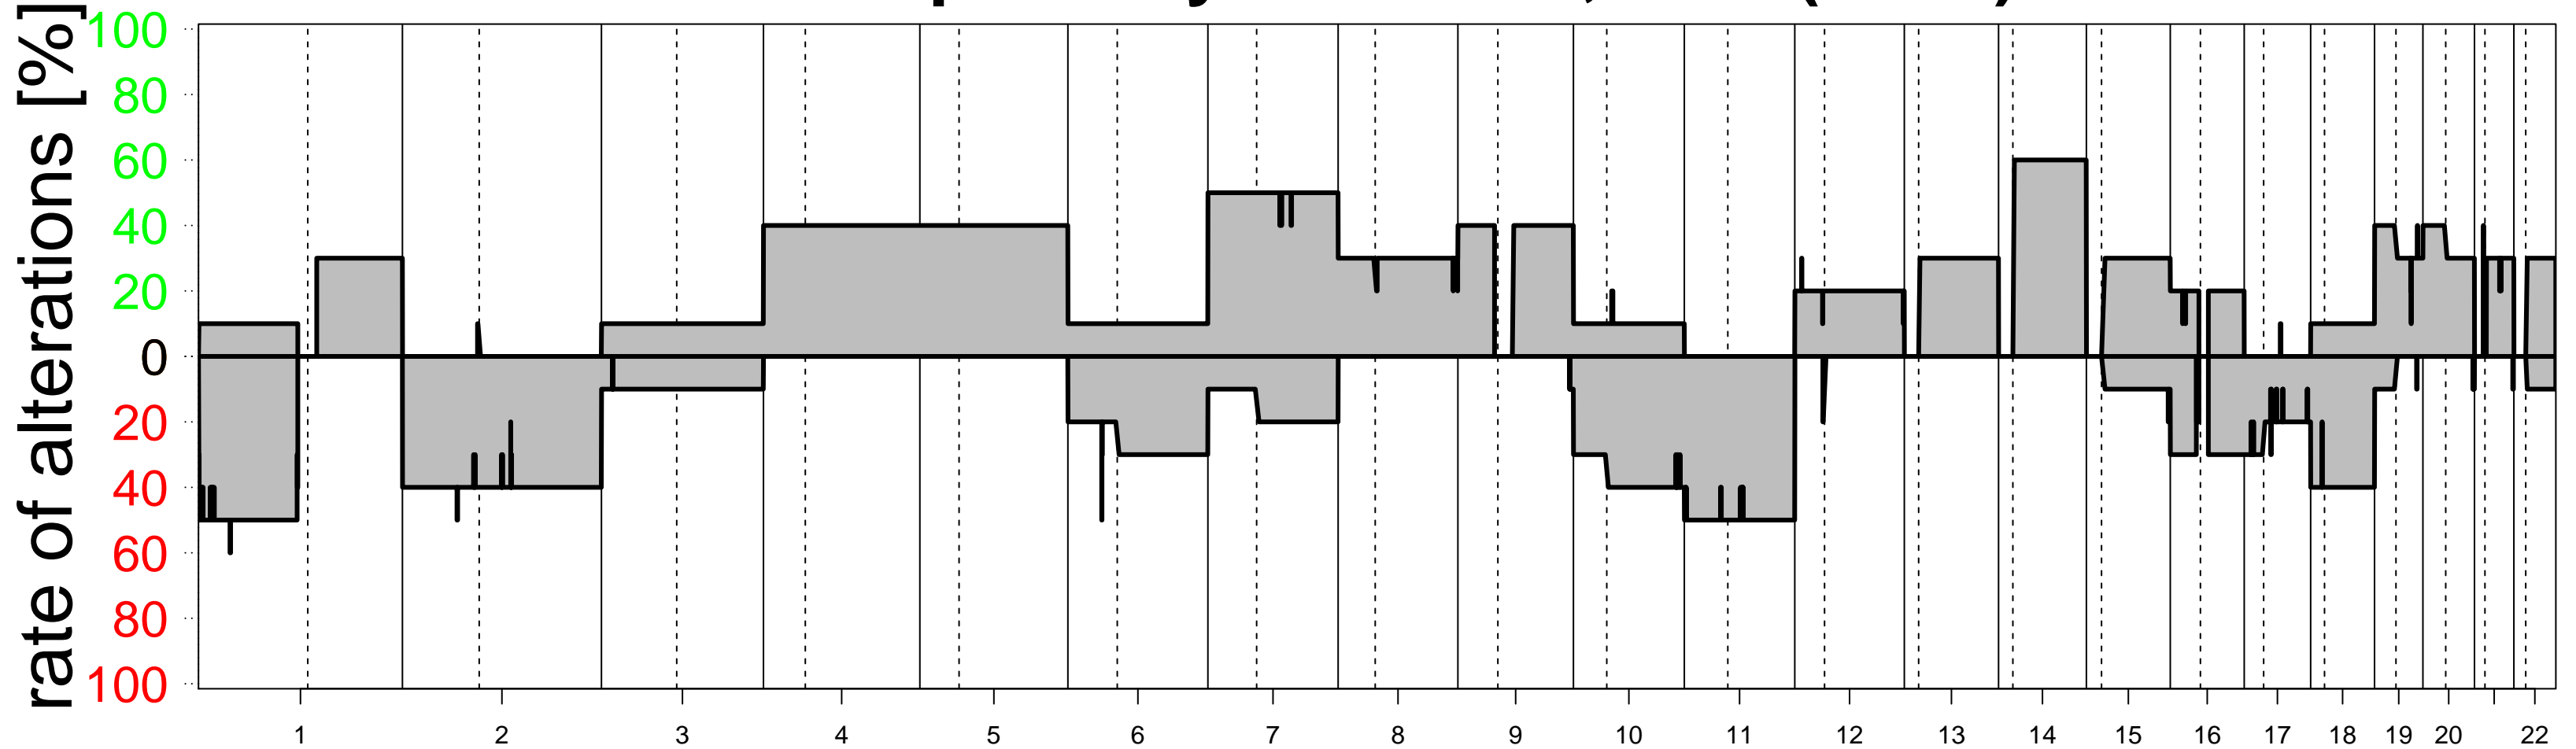



# m. c. plasmacytoma (n=8)

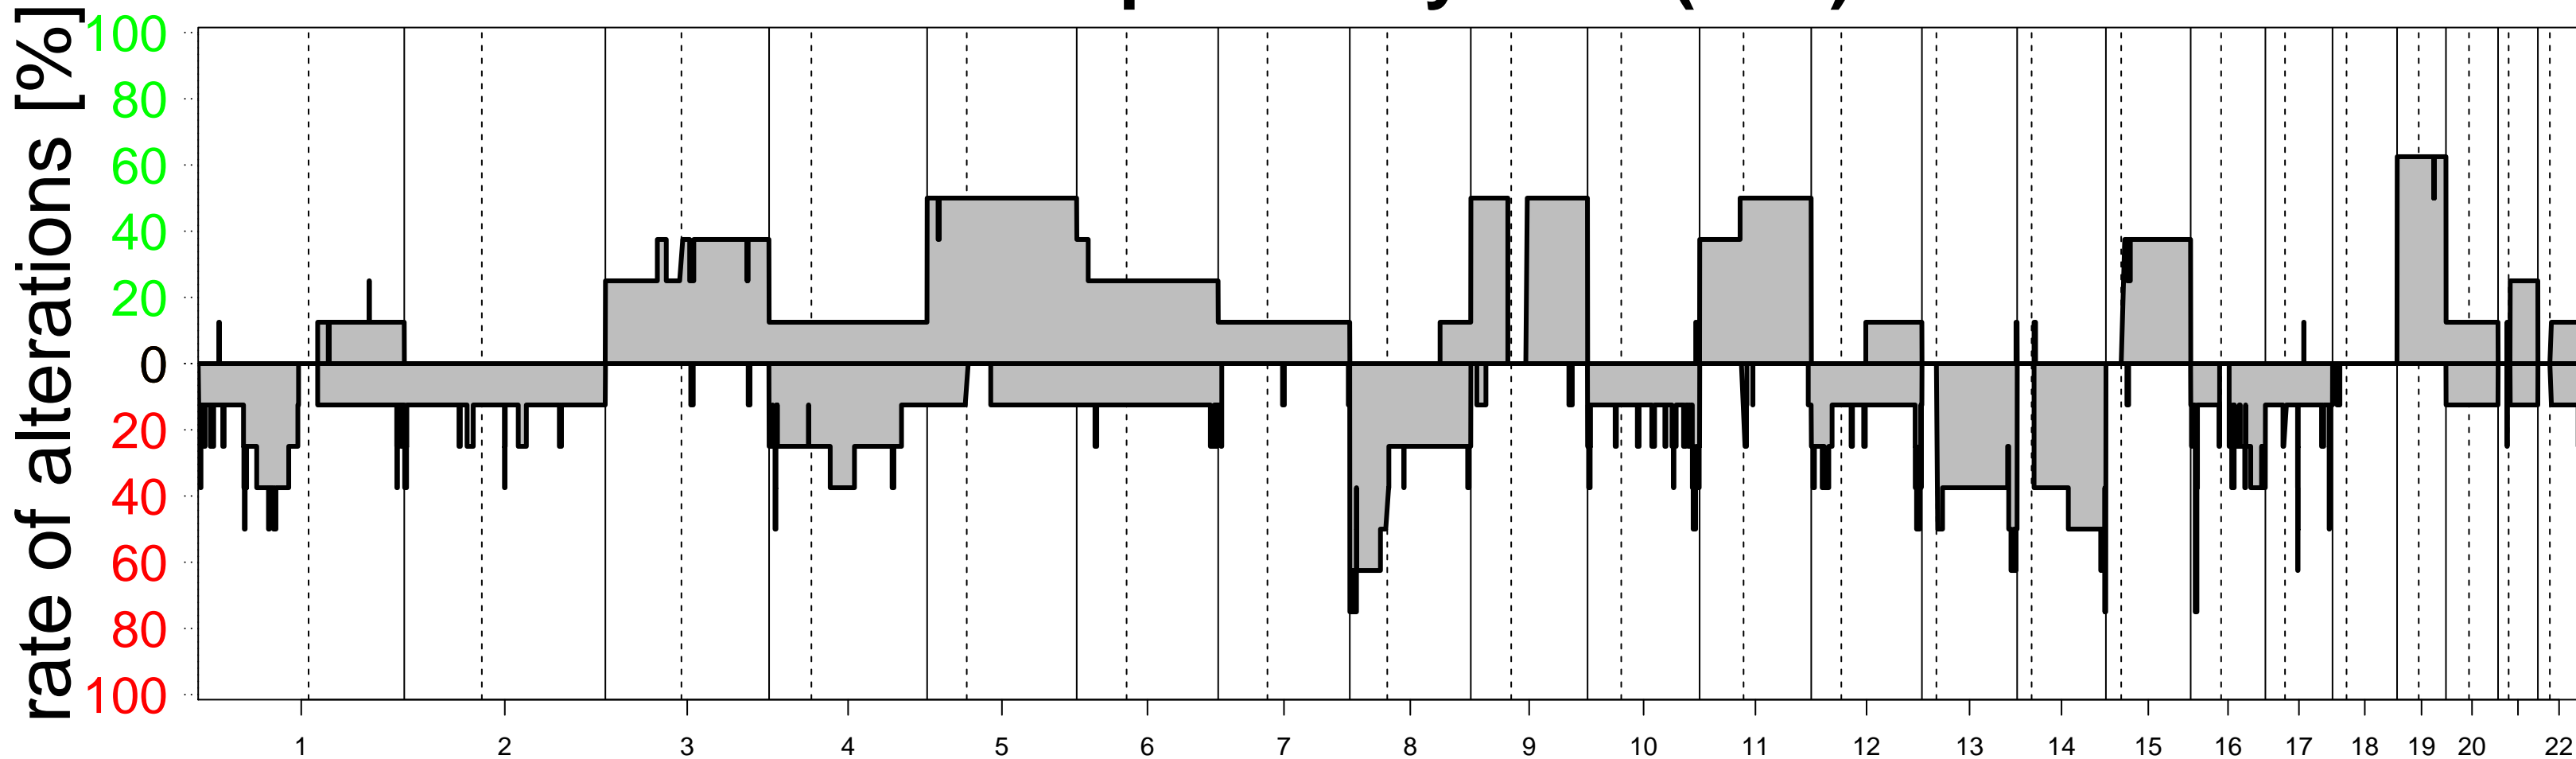

# m. c. plexus tumor, subclass adult (n=22)

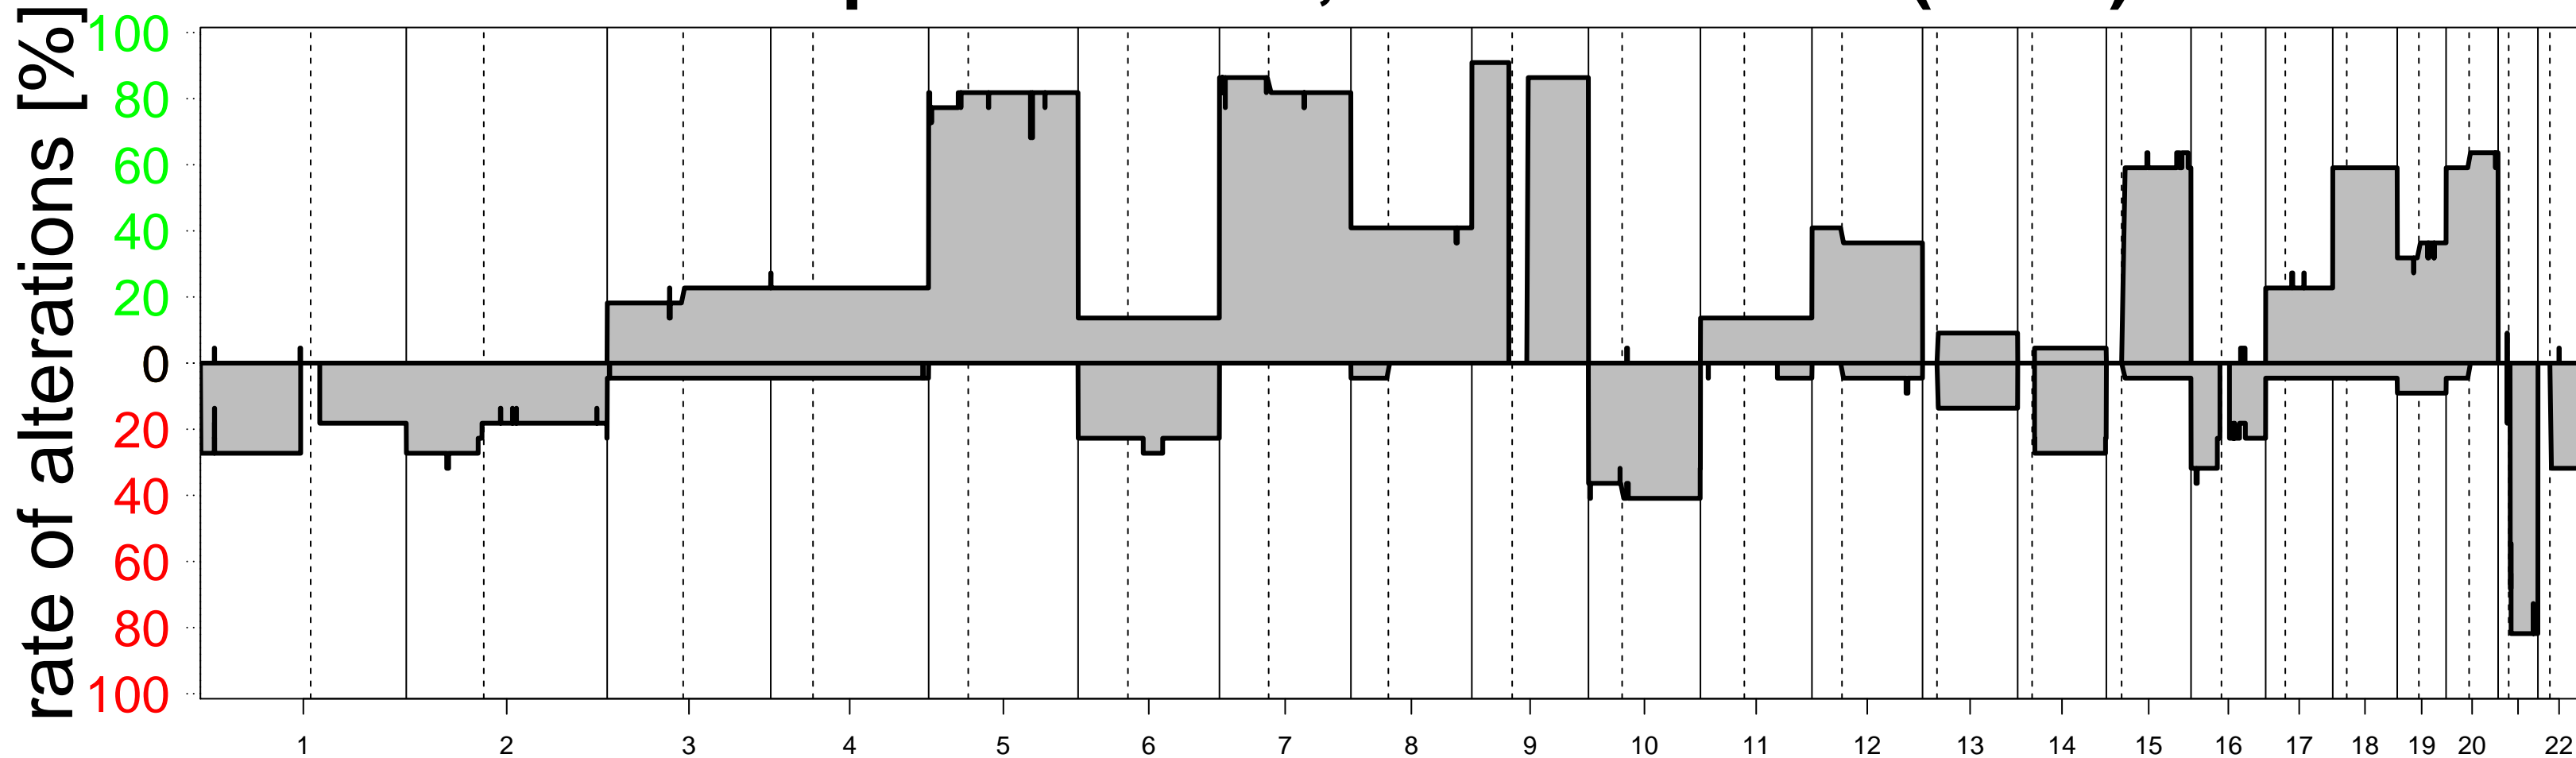

# m. c. plexus tumor, subclass paediatric A (n=15)

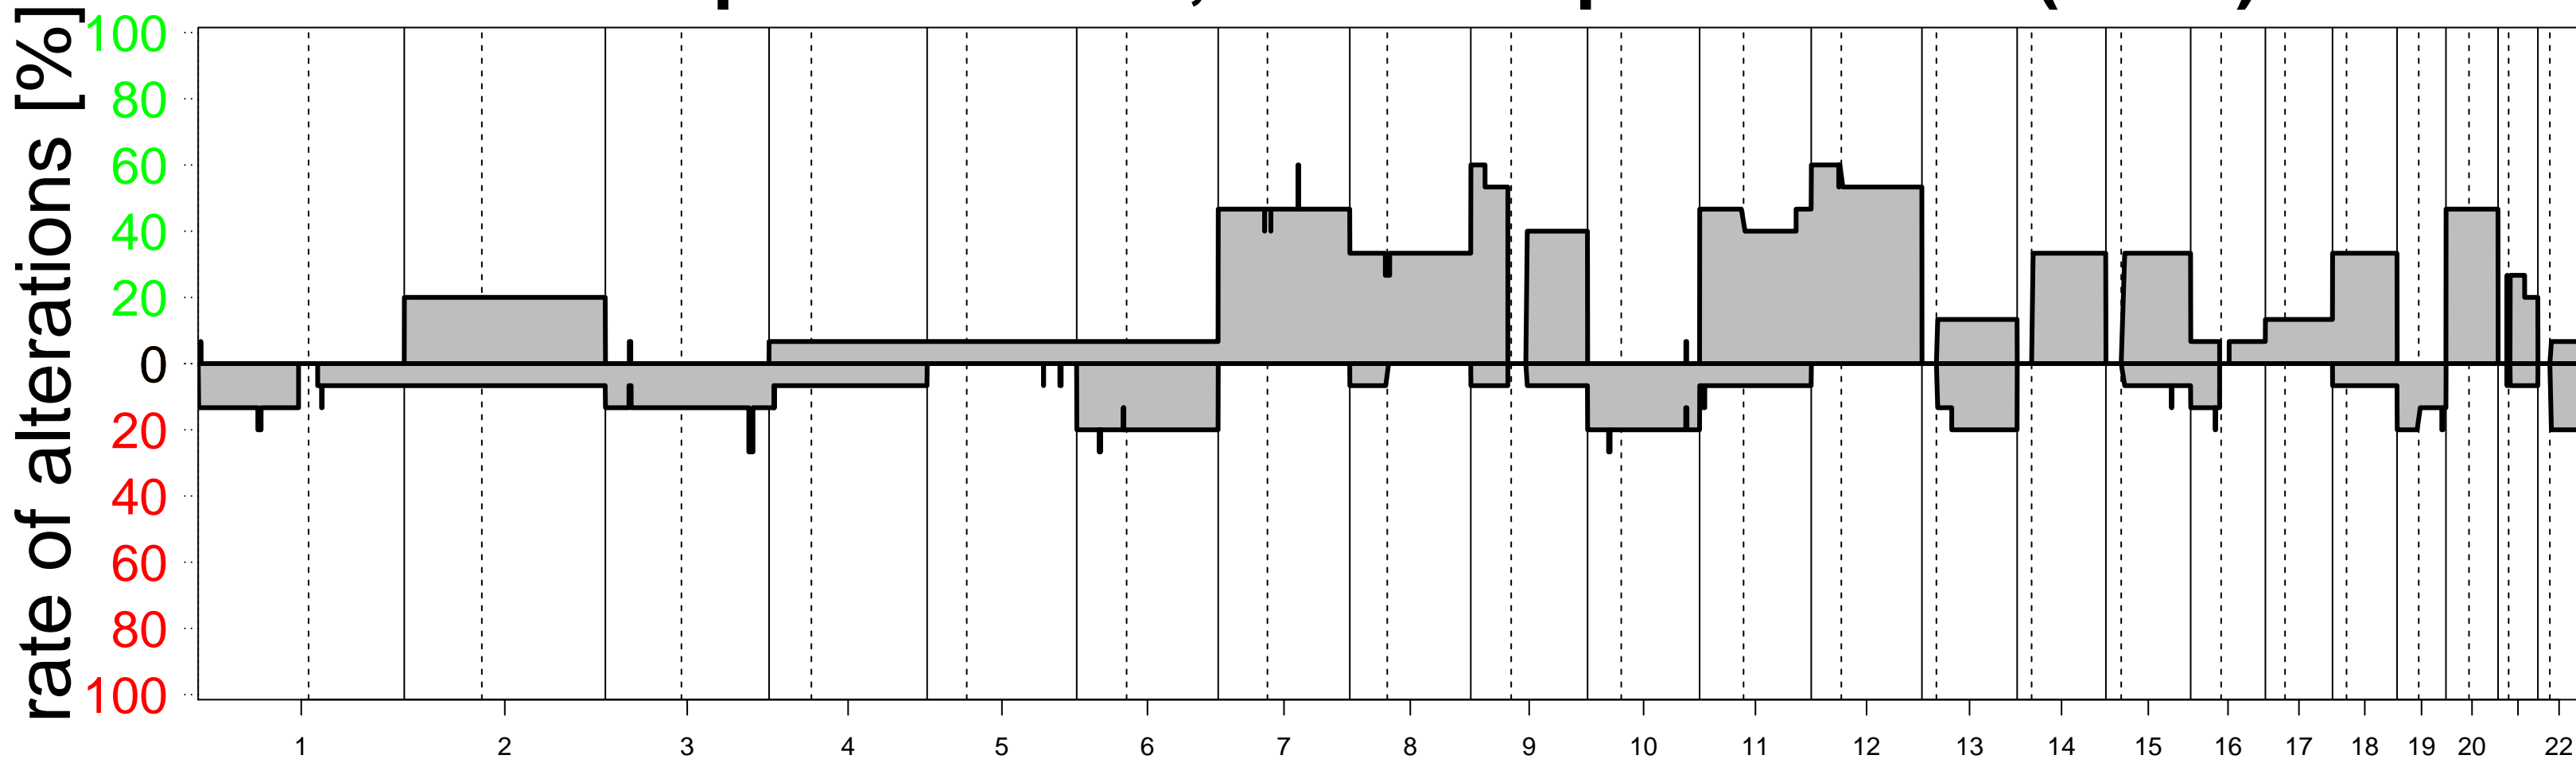

# m. c. plexus tumor, subclass paediatric B (n=46)

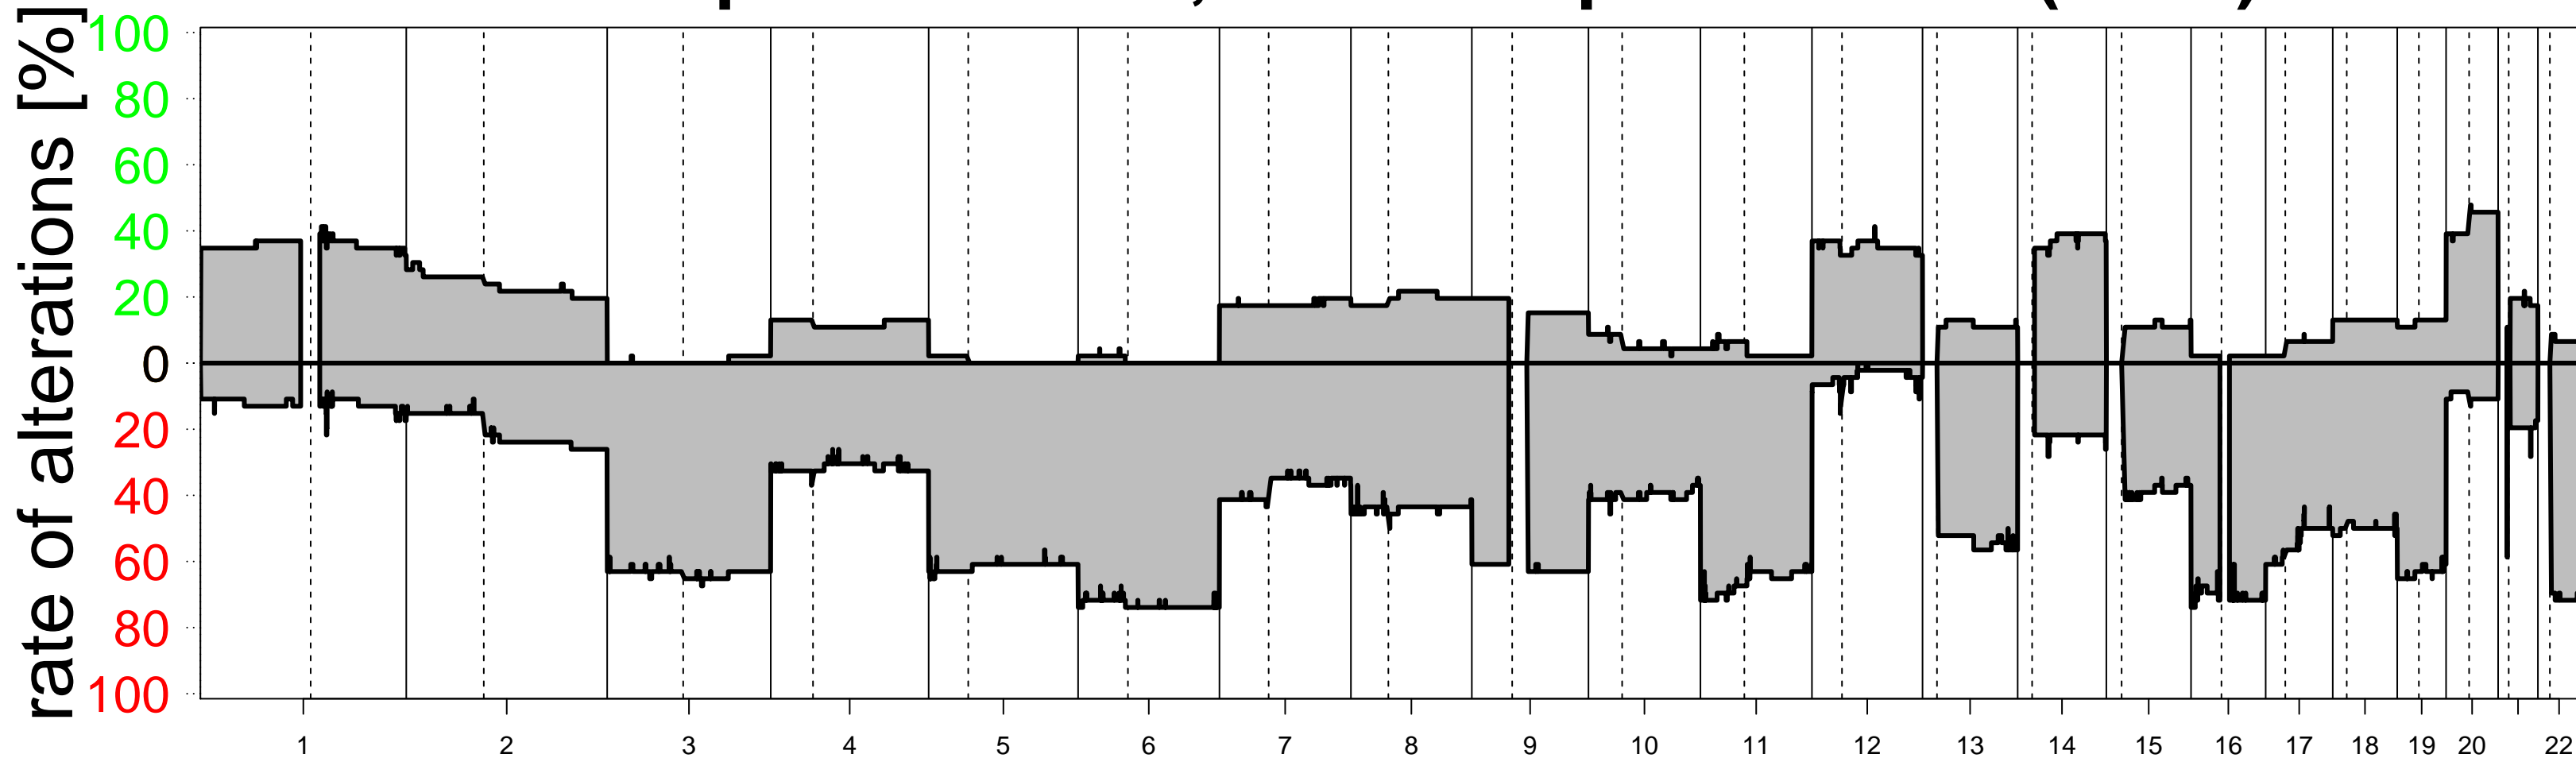

# m. c. retinoblastoma (n=19)

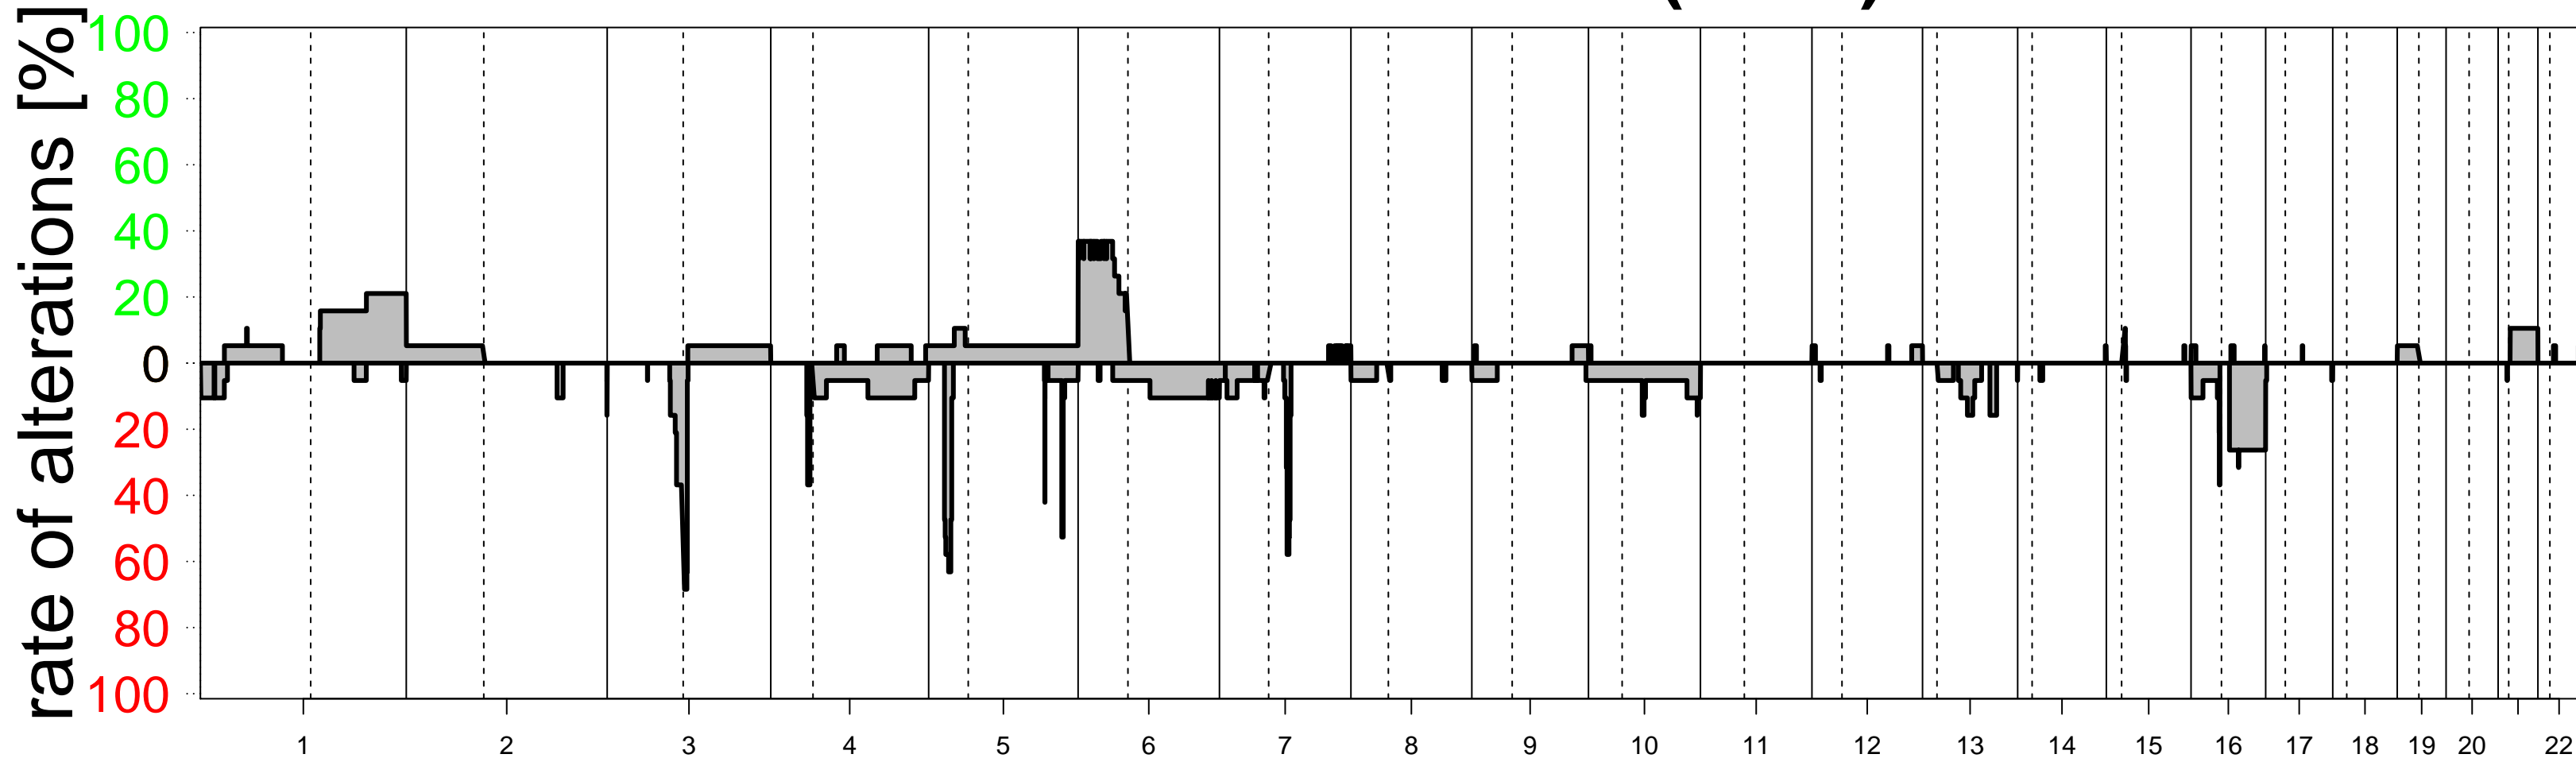

# m. c. schwannoma (n=23)

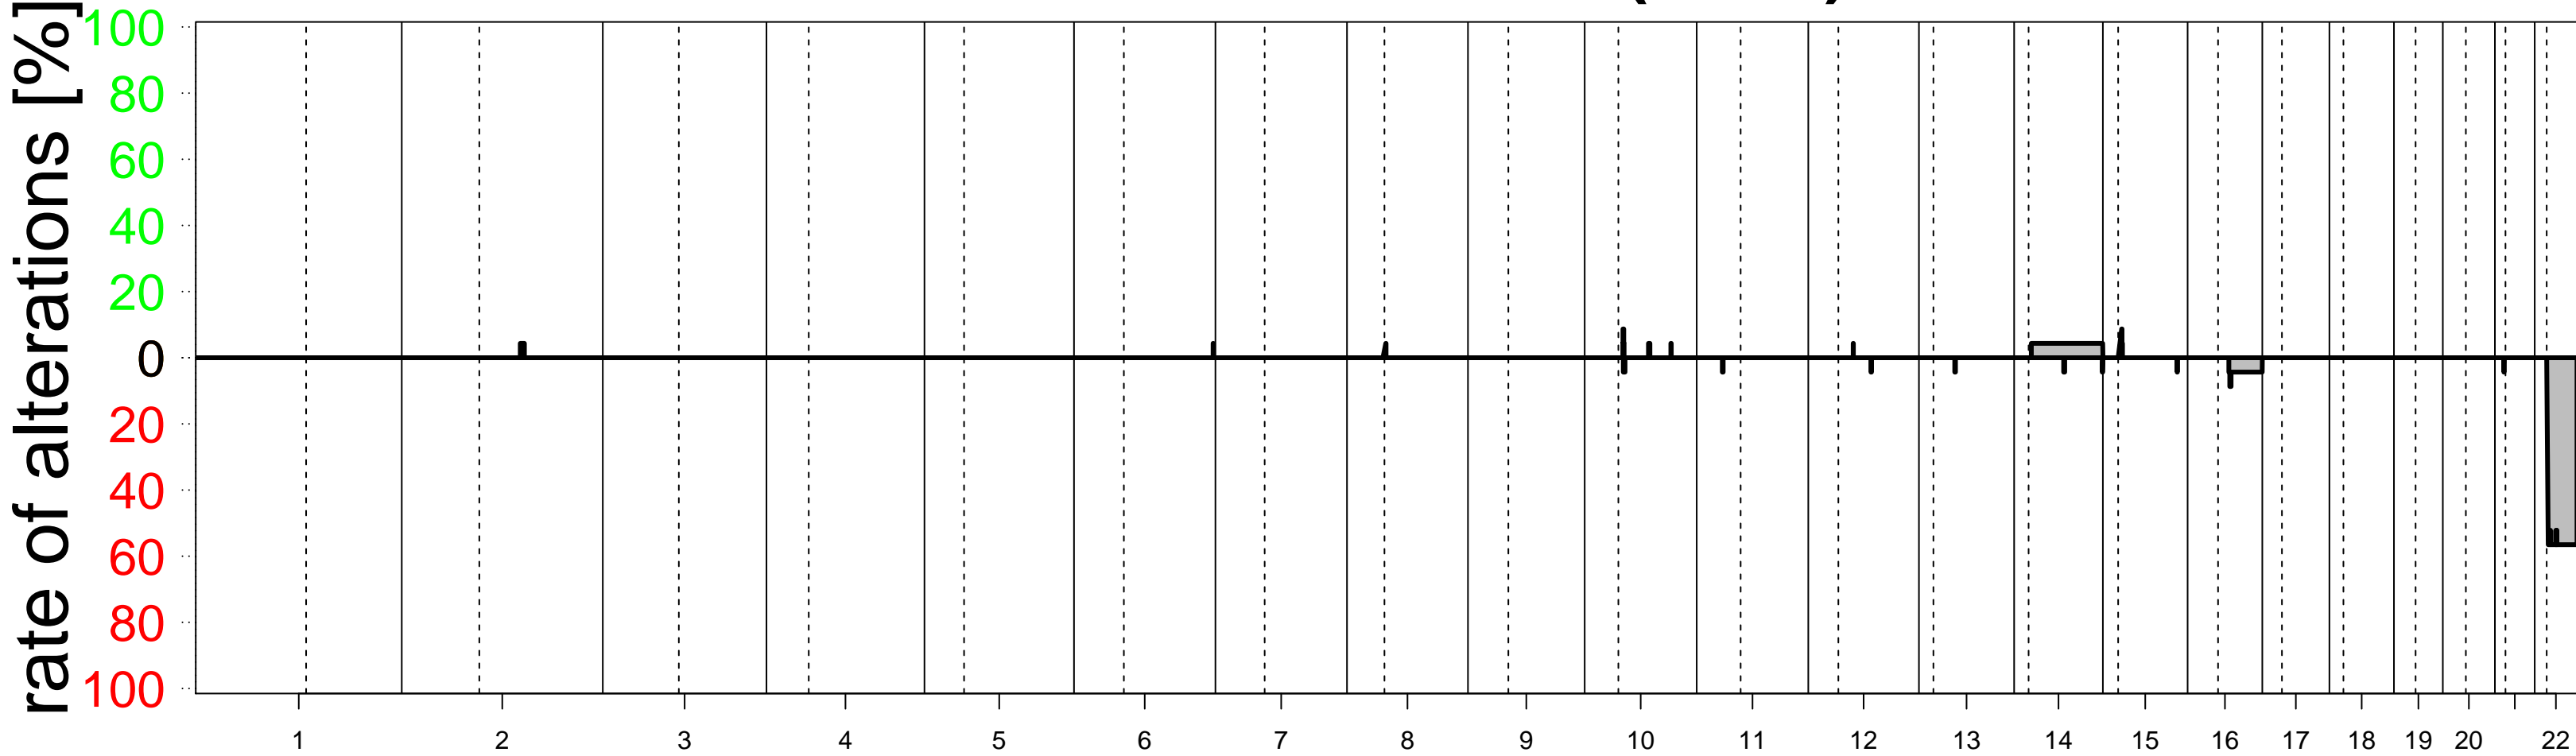

# m. c. solitary fibrous tumor – hemangiopericytoma (n=16)

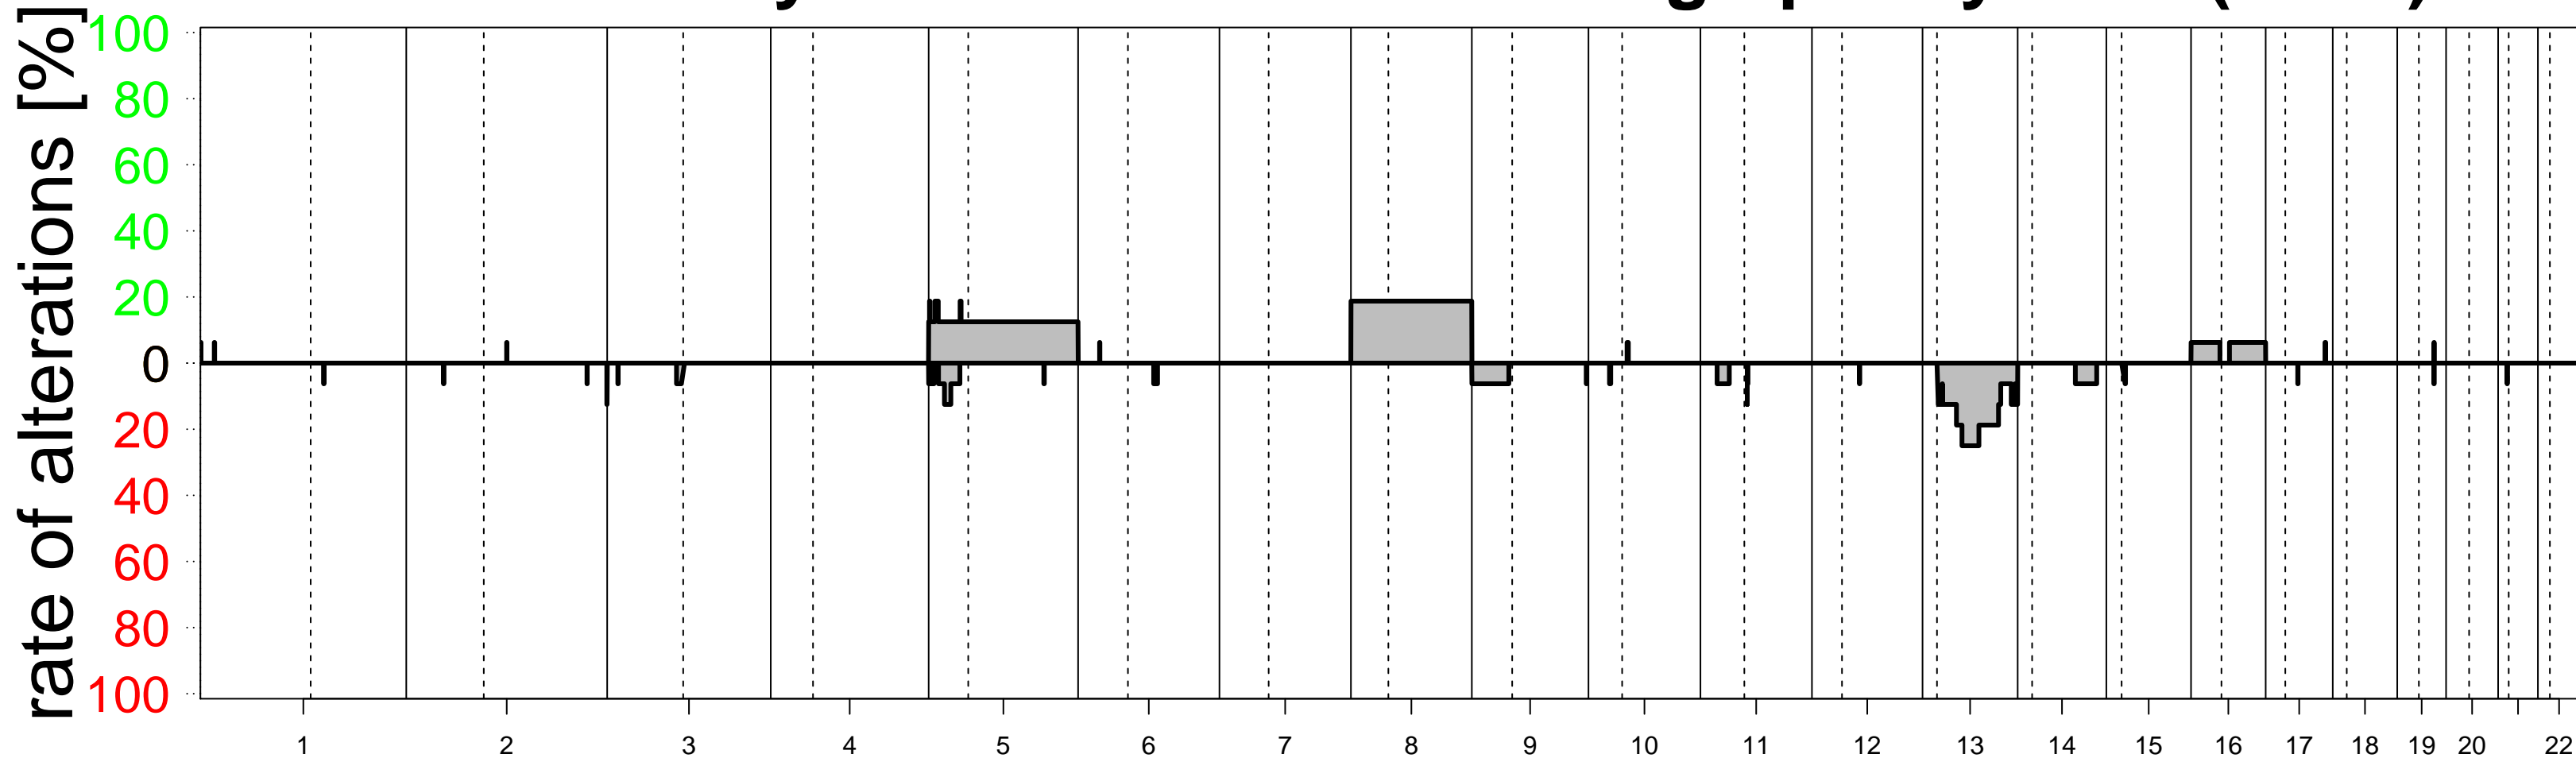

# m. c. subependymoma, posterior fossa (n=37)

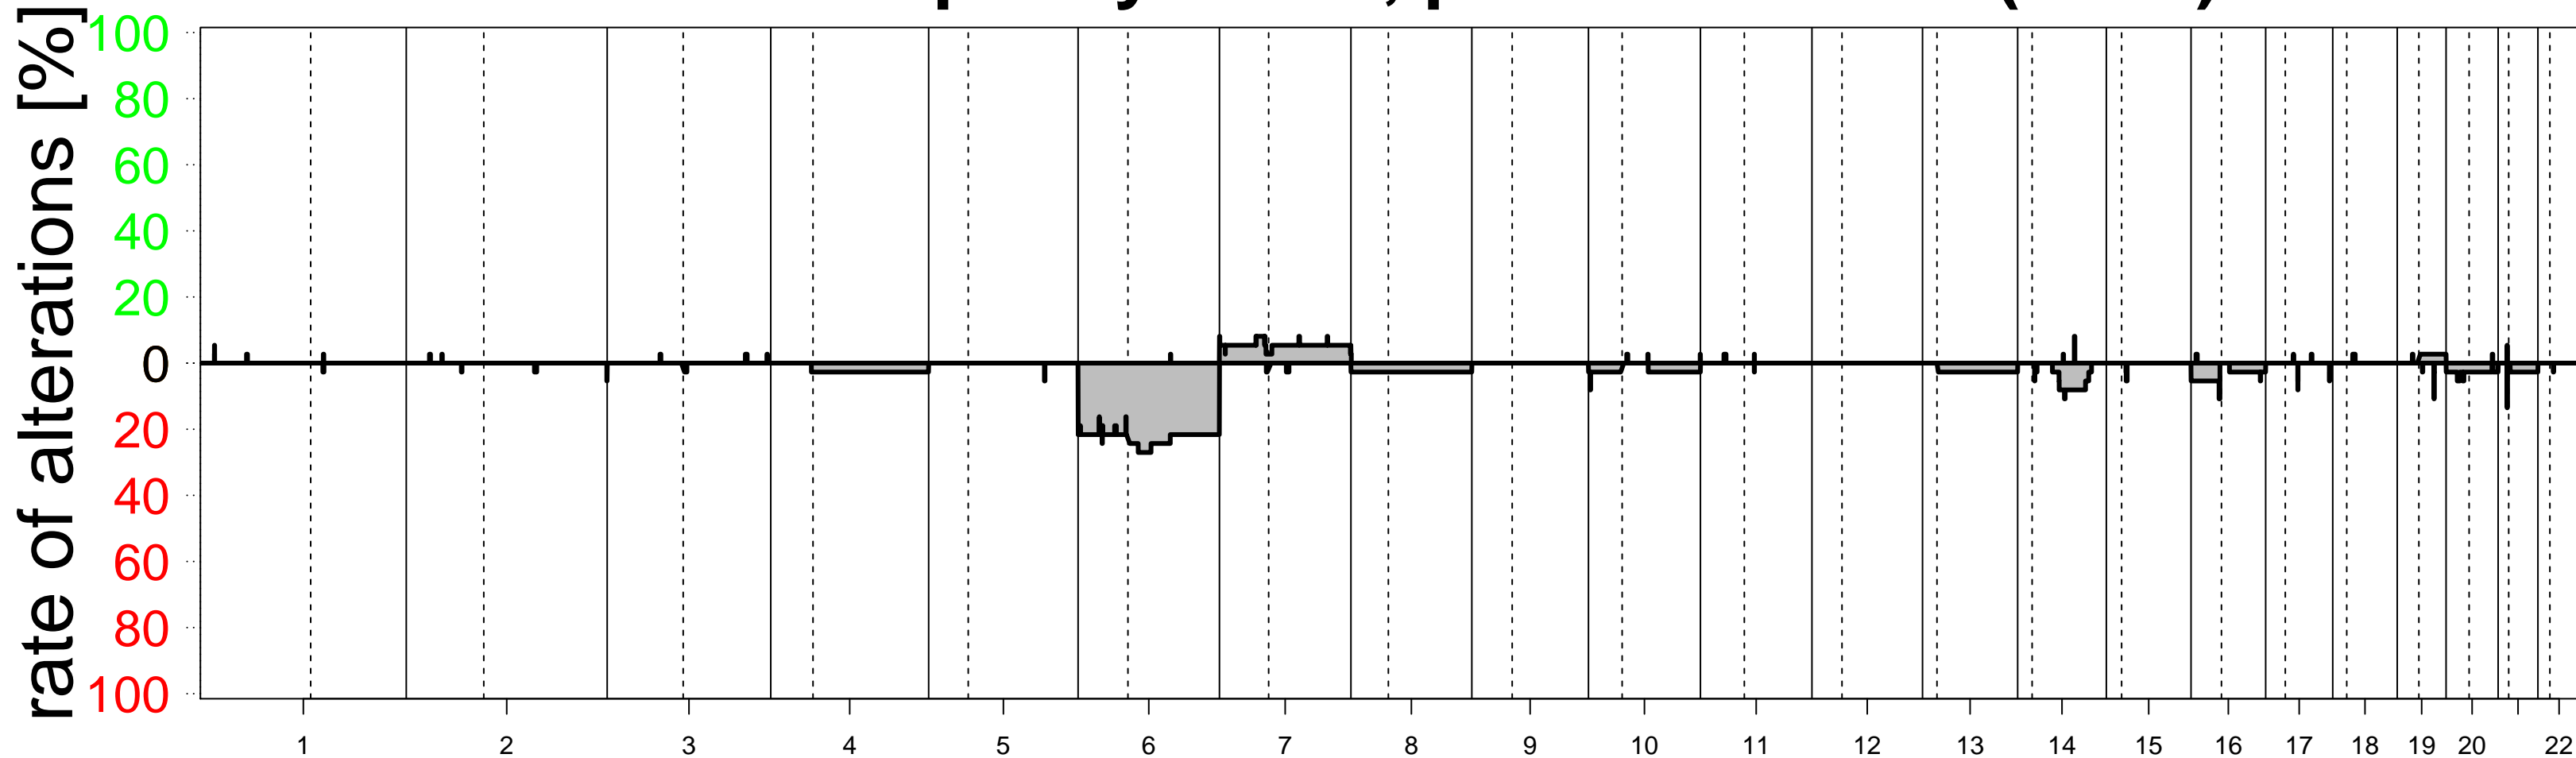



# m. c. subependymoma, spinal (n=9)

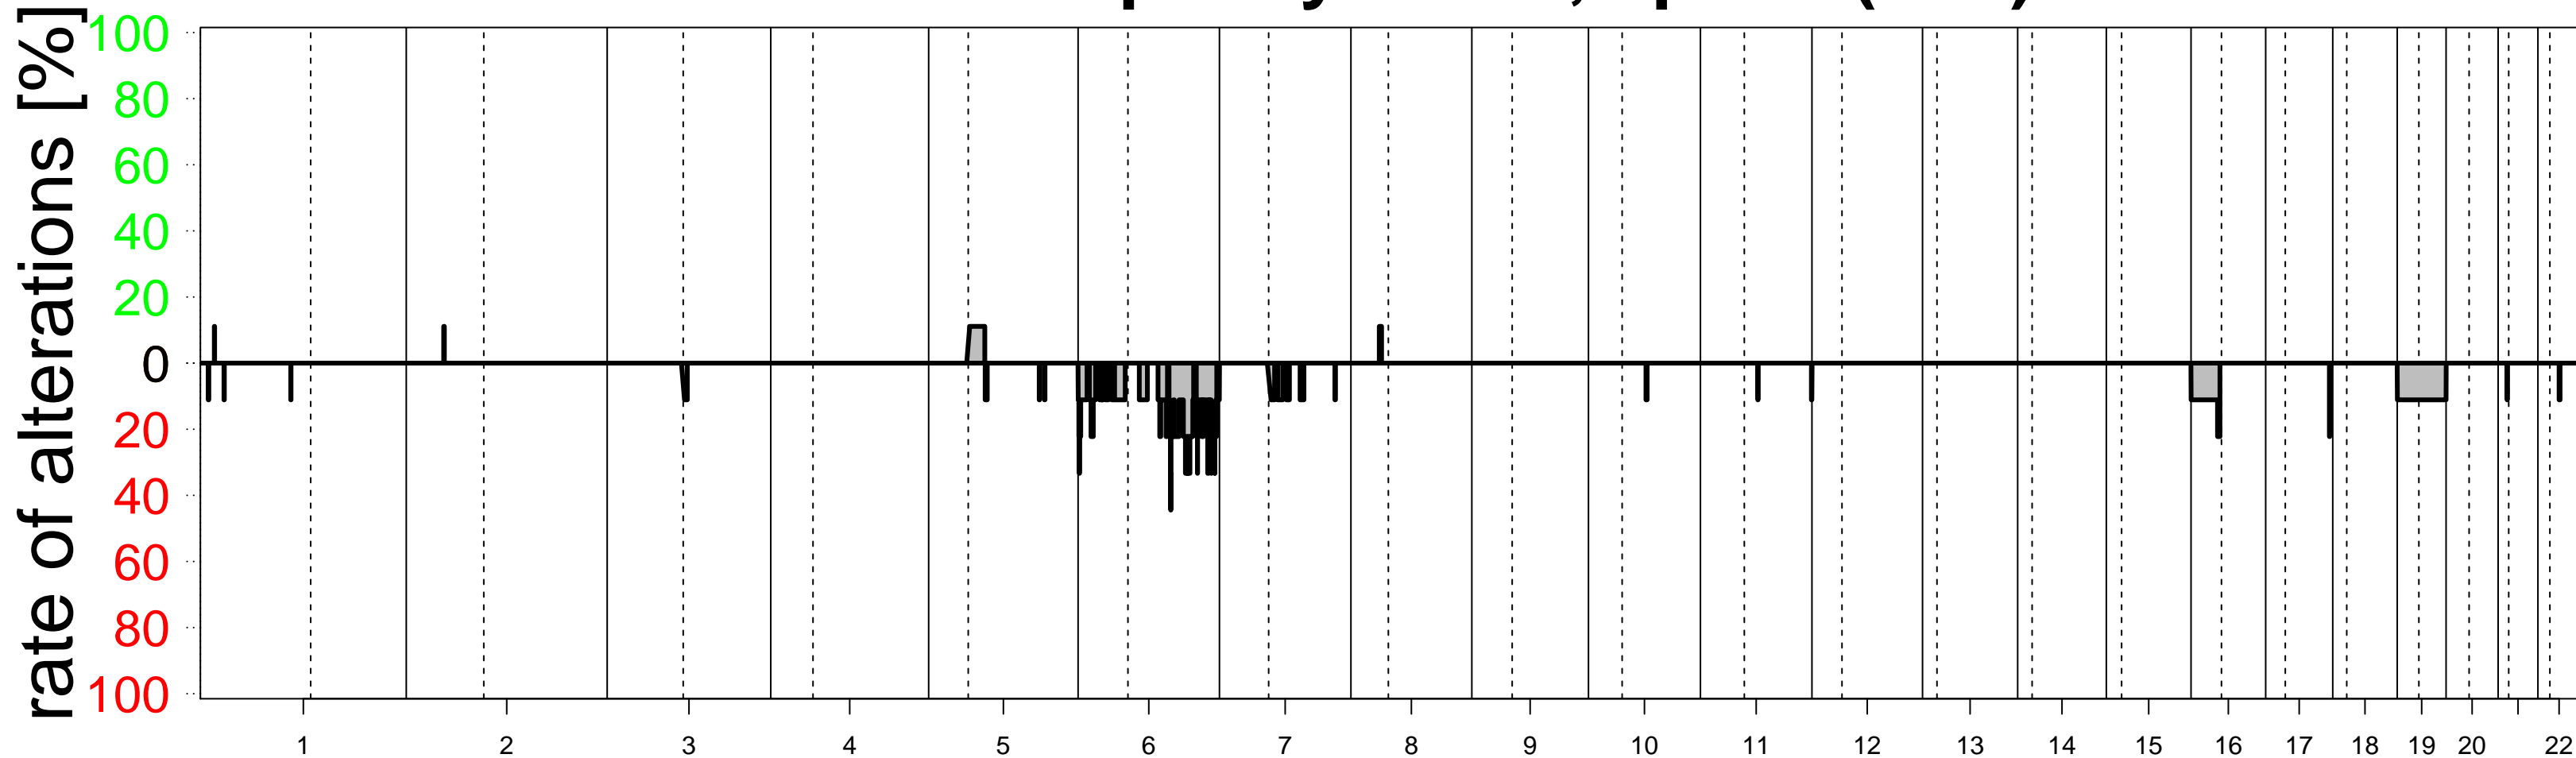

# m. c. subependymoma, supratentorial (n=19)

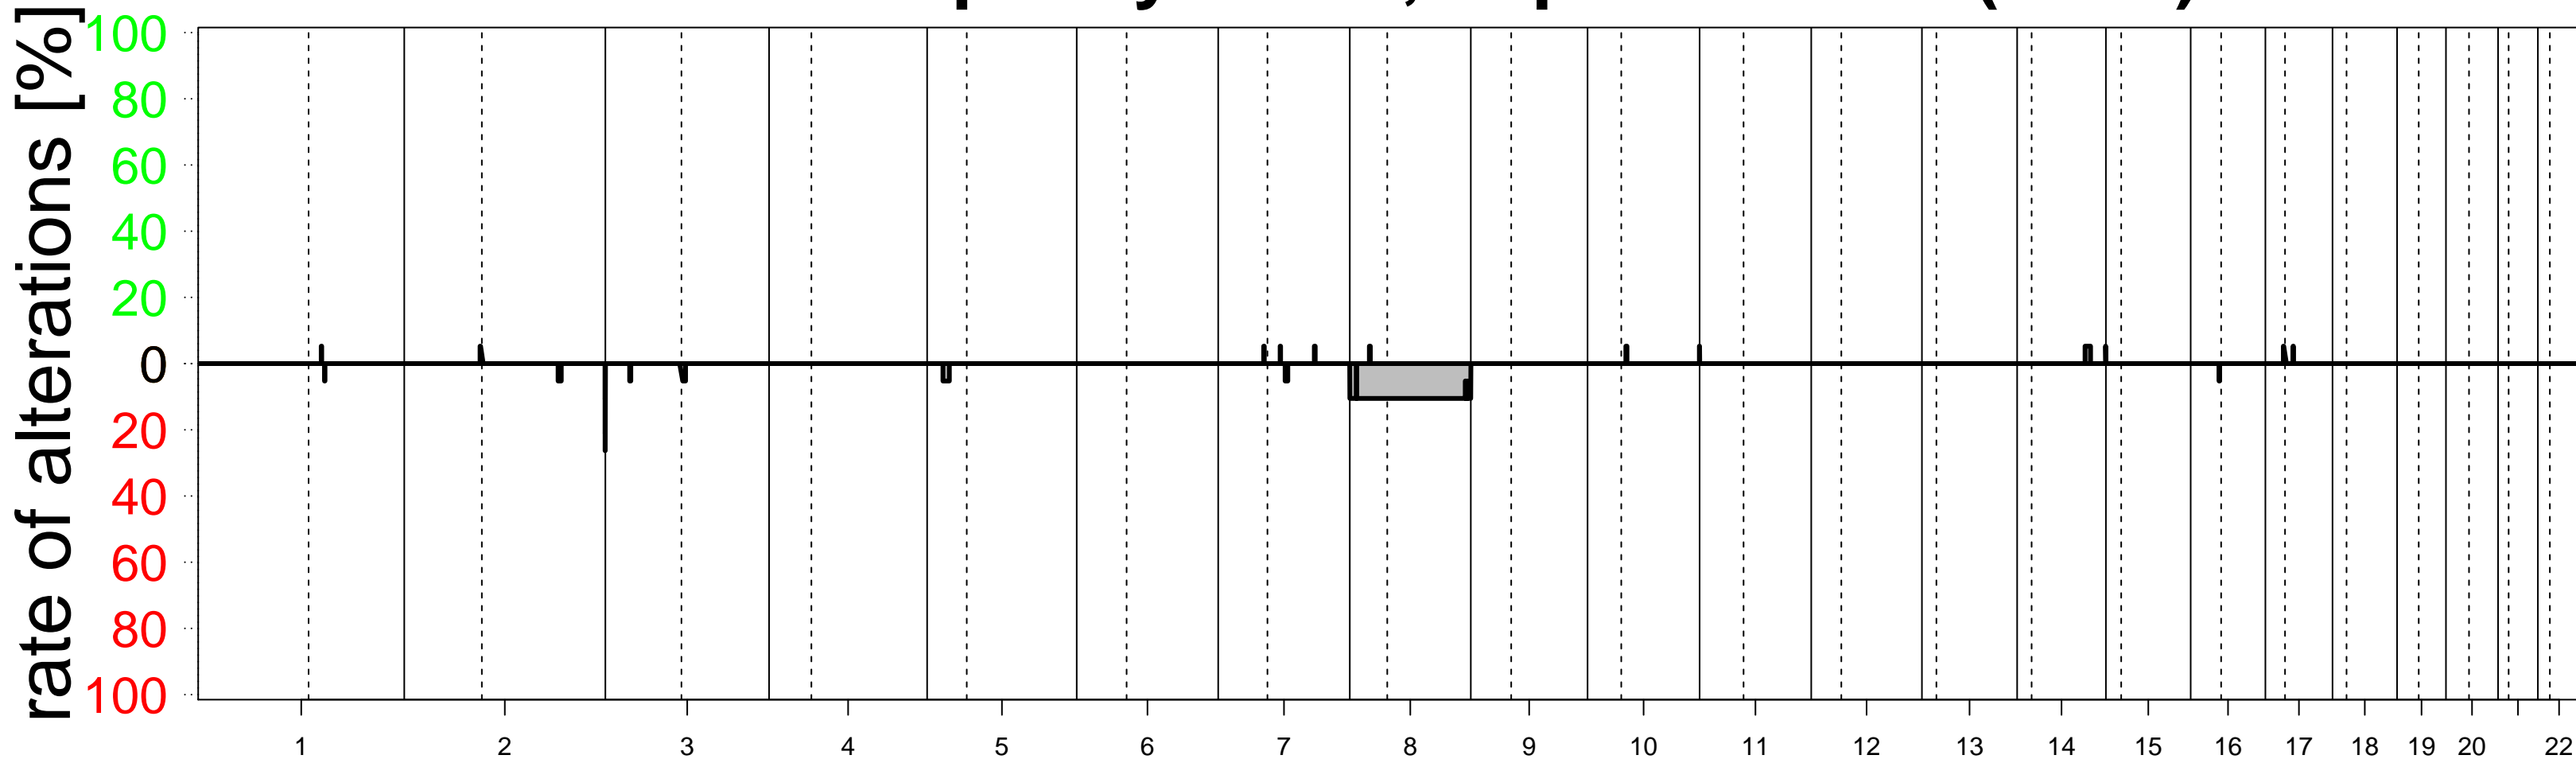

Supplement: MOESM1 [file 15900912]
